# Supplementary material for: Transcriptome Classification Reveals Molecular Subgroups in Patients with Hepatitis B Virus
Source: Hindawi journal article supplement (doi:10.1155/2021/5543747), 2021-03-30
Supplement: f1 [file 5543747.f1.pdf]

Table S1. The differentially expressed genes in the subgroups

| gene           | FDR (C1 vs. C2) | FDR (C1 vs. C3) | FDR (C2 vs. C3) | log2-FoldChange (C1 vs. C2) | log2-FoldChange (C1 vs. C3) | log2-FoldChange (C2 vs. C3) |
|----------------|-----------------|-----------------|-----------------|-----------------------------|-----------------------------|-----------------------------|
| A1CF           | 0.039514        | 9.93E-09        | 6.34E-09        | -0.07873                    | 0.554932                    | 0.633657                    |
| AACS           | 5.23E-05        | 5.73E-05        | 1.87E-09        | 0.454532                    | -0.45063                    | -0.90516                    |
| AADACP1        | 0.109525        | 0.003681        | 1.33E-05        | -0.24134                    | 0.454731                    | 0.69607                     |
| AADAT          | 0.000422        | 3.24E-09        | 3.59E-11        | -0.23948                    | 0.54361                     | 0.783087                    |
| AAED1          | 0.000107        | 1.56E-05        | 2.08E-10        | 0.239444                    | -0.28576                    | -0.5252                     |
| AASS           | 0.118714        | 7.10E-06        | 2.85E-07        | -0.11915                    | 0.61097                     | 0.730116                    |
| ABCA6          | 0.081872        | 2.39E-09        | 3.11E-09        | -0.07691                    | 0.544622                    | 0.621536                    |
| ABCB1          | 0.000481        | 9.05E-08        | 1.57E-11        | 0.319941                    | -0.51188                    | -0.83182                    |
| ABCB4          | 0.025223        | 0.00746         | 6.44E-06        | 0.235767                    | -0.33733                    | -0.5731                     |
| ABCC1          | 1.94E-06        | 1.62E-07        | 9.12E-11        | 0.297857                    | -0.38921                    | -0.68707                    |
| ABCG2          | 0.020901        | 1.08E-07        | 7.37E-10        | -0.1859                     | 0.7734                      | 0.959298                    |
| ABHD15         | 0.385513        | 3.14E-07        | 1.29E-08        | -0.04885                    | 0.466745                    | 0.515592                    |
| abParts        | 1.79E-08        | 9.69E-05        | 5.17E-11        | 0.929474                    | -0.96489                    | -1.89437                    |
| ABRACL         | 0.029467        | 0.008079        | 3.90E-05        | 0.266086                    | -0.30934                    | -0.57543                    |
| AC00453<br>8.3 | 0.92733         | 1.37E-07        | 1.38E-07        | 0.015908                    | 0.633685                    | 0.617776                    |
| AC01206<br>5.7 | 0.149521        | 2.31E-06        | 6.50E-07        | -0.10922                    | 0.481611                    | 0.590827                    |
| AC01700<br>2.2 | 0.022274        | 0.000223        | 5.44E-08        | 0.201984                    | -0.53709                    | -0.73908                    |
| AC07976<br>7.4 | 0.001294        | 0.001043        | 5.97E-08        | 0.28002                     | -0.53505                    | -0.81507                    |
| AC12867<br>7.4 | 6.03E-07        | 0.000575        | 5.45E-10        | 0.599582                    | -0.64625                    | -1.24583                    |
| ACACB          | 0.050444        | 1.08E-08        | 4.03E-09        | -0.13212                    | 0.446159                    | 0.578279                    |
| ACADL          | 0.173653        | 3.63E-09        | 1.51E-09        | -0.07332                    | 0.520692                    | 0.594012                    |
| ACADS          | 0.007314        | 9.55E-12        | 1.57E-11        | -0.16408                    | 0.589308                    | 0.753384                    |
| ACADSB         | 0.00112         | 7.37E-10        | 8.29E-11        | -0.21801                    | 0.730699                    | 0.948712                    |
| ACE2           | 0.094243        | 0.000635        | 1.02E-06        | 0.244373                    | -0.89305                    | -1.13743                    |
| ACLY           | 0.032081        | 2.35E-08        | 1.43E-09        | 0.156517                    | -0.48452                    | -0.64104                    |
| ACMSD          | 0.003147        | 8.10E-06        | 1.72E-10        | -0.28644                    | 0.458485                    | 0.744921                    |
| ACOT13         | 0.000164        | 1.48E-07        | 9.01E-10        | -0.16278                    | 0.358757                    | 0.521533                    |
| ACOT9          | 7.74E-07        | 1.98E-12        | 1.57E-11        | 0.221838                    | -0.44497                    | -0.66681                    |
| ACOX2          | 0.000742        | 3.17E-10        | 2.49E-11        | -0.15928                    | 0.471716                    | 0.630997                    |
| ACP5           | 0.009513        | 0.000667        | 3.35E-08        | 0.316956                    | -0.36536                    | -0.68231                    |
| ACSL4          | 1.68E-06        | 2.46E-07        | 4.42E-10        | 0.365945                    | -1.02593                    | -1.39187                    |
| ACSM2A         | 0.046903        | 2.03E-05        | 1.06E-07        | -0.12566                    | 0.470927                    | 0.596591                    |
| ACSM2B         | 0.034876        | 5.39E-06        | 1.11E-09        | -0.16966                    | 0.474304                    | 0.643961                    |
| ACSM3          | 0.022764        | 3.42E-11        | 7.58E-11        | -0.17781                    | 0.843738                    | 1.021547                    |
| ACSM5          | 0.313409        | 3.12E-05        | 3.11E-07        | -0.10455                    | 0.44798                     | 0.552526                    |
| ACTB           | 0.002955        | 2.65E-09        | 3.23E-10        | 0.212867                    | -0.34634                    | -0.55921                    |
| ACTG1          | 0.009161        | 1.61E-08        | 1.29E-09        | 0.217554                    | -0.37757                    | -0.59513                    |
| ACYP1          | 2.88E-05        | 0.001737        | 1.23E-09        | 0.317398                    | -0.24325                    | -0.56065                    |
| ADA            | 3.48E-06        | 8.73E-07        | 5.62E-11        | 0.364471                    | -0.54631                    | -0.91078                    |
| ADAMDE<br>C1   | 0.000797        | 6.09E-05        | 4.91E-09        | 0.505588                    | -1.28037                    | -1.78596                    |
| ADAMTS         | 1.33E-07        | 6.10E-10        | 1.57E-11        | 0.345108                    | -0.5476                     | -0.89271                    |
| ADAMTSL<br>2   | 0.003354        | 0.028974        | 5.89E-05        | 0.276379                    | -0.32946                    | -0.60584                    |
| ADAP2          | 1.20E-06        | 0.003236        | 3.63E-09        | 0.318618                    | -0.25159                    | -0.57021                    |
| ADCY1          | 0.050444        | 7.36E-09        | 1.79E-10        | -0.12765                    | 0.50463                     | 0.63228                     |
| ADCY10         | 0.002153        | 1.66E-05        | 2.42E-09        | -0.23518                    | 0.350973                    | 0.586154                    |
| ADCY7          | 4.36E-08        | 9.27E-06        | 2.43E-11        | 0.337494                    | -0.25301                    | -0.5905                     |

|          |          |          |          |          |          |          |
|----------|----------|----------|----------|----------|----------|----------|
| ADH6     | 0.518097 | 6.70E-10 | 2.92E-10 | -0.03377 | 0.5666   | 0.60037  |
| ADHFE1   | 0.042642 | 2.00E-06 | 1.87E-09 | -0.14813 | 0.477632 | 0.625765 |
| ADIRF    | 0.883163 | 0.014722 | 0.005239 | 0.081742 | -0.50479 | -0.58653 |
| ADORA2   | 0.009684 | 0.000128 | 2.14E-08 | -0.21634 | 0.33944  | 0.555785 |
| A-AS1    |          |          |          |          |          |          |
| ADORA3   | 0.357219 | 0.000171 | 5.47E-06 | 0.124399 | -0.52969 | -0.65408 |
| ADRA1A   | 0.757034 | 1.60E-06 | 3.11E-07 | -0.01894 | 0.539521 | 0.558458 |
| ADRA2A   | 8.40E-06 | 0.004183 | 2.18E-09 | 0.421938 | -0.53303 | -0.95497 |
| ADRBK2   | 6.94E-08 | 9.05E-08 | 1.91E-11 | 0.338651 | -0.35523 | -0.69388 |
| AEBP1    | 8.67E-08 | 7.02E-08 | 1.57E-11 | 0.684969 | -1.11383 | -1.7988  |
| AF070581 | 0.130247 | 3.39E-07 | 4.23E-09 | 0.087505 | -0.57975 | -0.66725 |
| AGA      | 1.80E-06 | 2.15E-08 | 2.58E-11 | 0.30088  | -0.37993 | -0.68081 |
| AGBL2    | 0.460806 | 7.59E-08 | 1.43E-08 | -0.11048 | 0.885321 | 0.995798 |
| AGL      | 0.205118 | 4.02E-09 | 1.87E-07 | -0.00499 | 0.502674 | 0.507663 |
| AGXT2    | 0.169737 | 4.49E-05 | 1.02E-07 | -0.10384 | 0.457516 | 0.561358 |
| AIF1     | 0.00047  | 0.000161 | 3.87E-08 | 0.20164  | -0.32685 | -0.52849 |
| AIM2     | 0.000383 | 0.001386 | 2.75E-08 | 0.565048 | -0.74199 | -1.30704 |
| AJUBA    | 5.37E-05 | 0.000342 | 2.54E-09 | 0.444096 | -0.37766 | -0.82175 |
| AKIP1    | 4.44E-06 | 3.14E-07 | 2.38E-11 | 0.232928 | -0.28915 | -0.52208 |
| AKR1B1   | 2.73E-08 | 1.48E-08 | 3.48E-11 | 0.438423 | -0.52032 | -0.95874 |
| AKR1B10  | 0.202778 | 1.48E-06 | 6.34E-09 | 0.573202 | -2.95599 | -3.52919 |
| AKR1D1   | 0.229723 | 1.93E-07 | 2.07E-09 | -0.08066 | 0.574537 | 0.655197 |
| ALAD     | 0.202778 | 4.45E-10 | 4.91E-10 | -0.05803 | 0.466833 | 0.524863 |
| ALDH1L1  | 0.07627  | 3.93E-10 | 7.58E-11 | -0.09976 | 0.550803 | 0.65056  |
| ALDH6A1  | 0.569099 | 1.61E-08 | 3.68E-08 | -0.01385 | 0.520581 | 0.534433 |
| ALDOA    | 6.84E-05 | 1.08E-08 | 1.06E-10 | 0.247262 | -0.48971 | -0.73697 |
| ALOX5    | 5.98E-08 | 7.74E-05 | 3.59E-11 | 0.290754 | -0.22902 | -0.51977 |
| ALOX5AP  | 1.68E-08 | 7.59E-08 | 3.36E-11 | 0.494243 | -0.6595  | -1.15375 |
| ALPK2    | 0.392802 | 0.086372 | 0.001462 | -0.27574 | 0.620526 | 0.896262 |
| AMICA1   | 6.77E-09 | 1.98E-10 | 1.57E-11 | 0.521011 | -0.65021 | -1.17122 |
| AMIGO2   | 5.53E-05 | 0.000223 | 1.29E-09 | 0.416289 | -0.306   | -0.72229 |
| AMN      | 0.071056 | 9.89E-06 | 5.73E-09 | -0.18591 | 0.494626 | 0.680532 |
| AMT      | 0.004939 | 9.93E-09 | 1.41E-10 | -0.12686 | 0.412992 | 0.539854 |
| ANGPTL2  | 0.000117 | 3.39E-07 | 4.72E-11 | 0.19304  | -0.42923 | -0.62227 |
| ANKRD22  | 3.93E-05 | 0.000109 | 1.34E-10 | 0.605565 | -0.83434 | -1.4399  |
| ANKRD29  | 0.000838 | 1.18E-06 | 5.92E-11 | 0.407676 | -0.82416 | -1.23183 |
| ANKRD35  | 0.066653 | 2.03E-05 | 1.17E-07 | -0.13612 | 0.601444 | 0.737561 |
| ANLN     | 0.000138 | 1.29E-05 | 2.31E-10 | 0.340749 | -0.75703 | -1.09778 |
| ANXA1    | 1.06E-07 | 1.75E-09 | 1.57E-11 | 0.307302 | -0.37121 | -0.67851 |
| ANXA10   | 0.003786 | 5.86E-08 | 2.43E-10 | -0.25055 | 0.834478 | 1.085023 |
| ANXA13   | 0.09815  | 5.73E-05 | 1.28E-07 | 0.328071 | -0.84742 | -1.17549 |
| ANXA2    | 2.94E-06 | 3.03E-12 | 1.57E-11 | 0.368417 | -0.73363 | -1.10205 |
| ANXA2P2  | 4.18E-05 | 3.03E-12 | 1.57E-11 | 0.426206 | -1.00028 | -1.42649 |
| ANXA3    | 0.000965 | 1.29E-05 | 4.42E-10 | 0.513924 | -0.90798 | -1.4219  |
| ANXA4    | 2.65E-05 | 7.59E-08 | 1.69E-11 | 0.30297  | -0.54359 | -0.84656 |
| ANXA5    | 1.17E-05 | 9.55E-12 | 2.38E-11 | 0.364134 | -0.72152 | -1.08565 |
| AOAH     | 5.66E-06 | 0.000144 | 2.19E-10 | 0.364667 | -0.37017 | -0.73484 |
| AOX1     | 0.092936 | 1.26E-09 | 9.01E-10 | -0.07345 | 0.588884 | 0.662336 |
| AP000253 | 0.906416 | 4.16E-08 | 2.36E-07 | 0.039451 | 0.834421 | 0.79497  |
| .1       |          |          |          |          |          |          |
| AP1S2    | 1.80E-06 | 1.18E-06 | 4.10E-11 | 0.269066 | -0.35531 | -0.62437 |
| APCDD1   | 0.005249 | 0.002595 | 3.68E-08 | 0.255183 | -0.42445 | -0.67964 |
| APH1B    | 3.71E-05 | 2.18E-09 | 2.49E-11 | 0.172226 | -0.35991 | -0.53214 |
| APOA5    | 0.074119 | 0.000263 | 2.59E-07 | -0.23375 | 0.66176  | 0.89551  |
| APOBEC3  | 0.024383 | 0.044945 | 6.33E-05 | 0.24175  | -0.30531 | -0.54706 |
| A        |          |          |          |          |          |          |
| APOBEC3  | 0.024383 | 0.044945 | 6.33E-05 | 0.24175  | -0.30531 | -0.54706 |
| A_B      |          |          |          |          |          |          |

|              |          |          |          |          |          |          |
|--------------|----------|----------|----------|----------|----------|----------|
| APOBEC3<br>B | 4.06E-05 | 9.27E-06 | 1.06E-10 | 0.538528 | -0.98604 | -1.52457 |
| APOBEC3<br>G | 4.18E-05 | 4.33E-11 | 1.69E-11 | 0.229582 | -0.56801 | -0.7976  |
| APOF         | 0.044713 | 4.52E-09 | 8.59E-10 | -0.11632 | 0.830736 | 0.947058 |
| APOL3        | 2.55E-06 | 2.00E-06 | 5.62E-11 | 0.654135 | -0.92034 | -1.57447 |
| AQP1         | 2.31E-06 | 0.000103 | 7.37E-10 | 0.889771 | -0.93995 | -1.82973 |
| AR           | 0.054414 | 2.16E-11 | 3.40E-10 | -0.06624 | 0.694839 | 0.761079 |
| ARF4         | 0.177862 | 3.78E-08 | 3.03E-08 | 0.099564 | -0.43127 | -0.53084 |
| ARHGAP1<br>0 | 0.175754 | 9.47E-07 | 5.44E-08 | -0.12207 | 0.509201 | 0.631267 |
| ARHGAP1<br>8 | 6.90E-07 | 1.61E-08 | 2.49E-11 | 0.360889 | -0.46352 | -0.82441 |
| ARHGAP2<br>5 | 1.56E-07 | 6.20E-06 | 4.51E-11 | 0.253125 | -0.29422 | -0.54734 |
| ARHGAP4      | 8.67E-06 | 0.000171 | 4.42E-10 | 0.235842 | -0.26499 | -0.50084 |
| ARHGAP9      | 2.41E-08 | 9.89E-06 | 2.43E-11 | 0.52114  | -0.5322  | -1.05334 |
| ARHGDI8      | 6.06E-05 | 1.48E-07 | 1.79E-10 | 0.201527 | -0.38184 | -0.58337 |
| ARHGEF1<br>8 | 2.80E-05 | 7.48E-07 | 3.07E-10 | 0.237872 | -0.28    | -0.51787 |
| ARHGEF2<br>6 | 0.811944 | 9.69E-05 | 0.000275 | 0.085473 | 0.56172  | 0.476247 |
| ARHGEF3      | 3.65E-09 | 8.21E-11 | 1.57E-11 | 0.574333 | -0.67842 | -1.25275 |
| ARHGEF6      | 1.55E-06 | 1.48E-06 | 1.01E-10 | 0.297831 | -0.31639 | -0.61422 |
| ARL4C        | 3.44E-07 | 1.37E-07 | 1.57E-11 | 0.32718  | -0.39011 | -0.71729 |
| ARL6IP5      | 0.008665 | 3.53E-06 | 3.28E-09 | 0.17407  | -0.33509 | -0.50916 |
| ARMCX1       | 2.08E-06 | 6.45E-05 | 3.73E-11 | 0.467948 | -0.39239 | -0.86034 |
| ARMCX2       | 2.51E-07 | 4.06E-06 | 2.49E-11 | 0.454566 | -0.47303 | -0.9276  |
| ARMCX3       | 0.015866 | 9.69E-05 | 1.62E-07 | 0.241367 | -0.36963 | -0.611   |
| ARNTL        | 0.666416 | 0.003236 | 0.010167 | 0.103147 | 0.592626 | 0.489478 |
| ARNTL2       | 0.042642 | 6.10E-10 | 9.63E-11 | 0.113077 | -0.49815 | -0.61123 |
| ARPC1B       | 1.11E-06 | 1.36E-11 | 1.57E-11 | 0.415549 | -0.64886 | -1.06441 |
| ARPC2        | 1.13E-05 | 2.41E-12 | 1.57E-11 | 0.185861 | -0.42044 | -0.6063  |
| ARPC3        | 0.000493 | 1.12E-09 | 4.10E-11 | 0.188038 | -0.41117 | -0.59921 |
| ARRDC2       | 0.003636 | 1.38E-06 | 9.52E-10 | 0.165896 | -0.4452  | -0.6111  |
| ARRDC3       | 0.477079 | 1.90E-05 | 3.02E-06 | -0.11477 | 0.549583 | 0.66435  |
| ARRDC4       | 0.224626 | 0.044945 | 0.000479 | 0.231654 | -0.27725 | -0.5089  |
| ARSE         | 0.292008 | 2.93E-05 | 9.75E-07 | -0.06767 | 0.485637 | 0.553309 |
| ARSJ         | 0.012307 | 0.000223 | 6.02E-09 | 0.182247 | -0.42175 | -0.604   |
| ASB9         | 0.144149 | 0.005168 | 6.99E-06 | -0.27918 | 0.657342 | 0.936521 |
| ASCC3        | 2.08E-06 | 4.77E-05 | 1.88E-10 | 0.347064 | -0.32208 | -0.66914 |
| ASNS         | 9.49E-05 | 9.47E-07 | 2.87E-11 | 0.203107 | -0.36177 | -0.56488 |
| ASPA         | 0.090373 | 1.29E-05 | 2.04E-08 | -0.19579 | 0.54347  | 0.739261 |
| ASPG         | 0.019115 | 4.06E-06 | 3.28E-09 | -0.27374 | 0.479708 | 0.753447 |
| ASPHD2       | 7.51E-05 | 3.79E-06 | 1.88E-10 | 0.254167 | -0.43382 | -0.68799 |
| ASPM         | 0.000533 | 0.000211 | 5.43E-09 | 0.277015 | -0.53772 | -0.81473 |
| ASPN         | 0.000151 | 0.00159  | 6.26E-08 | 0.383482 | -0.35241 | -0.7359  |
| ASRGL1       | 0.153348 | 5.97E-07 | 1.87E-09 | 0.119156 | -0.41777 | -0.53692 |
| ATAD2        | 0.006001 | 0.000223 | 3.03E-08 | 0.225834 | -0.35054 | -0.57637 |
| ATF5         | 0.012087 | 7.48E-07 | 3.35E-08 | -0.15948 | 0.362595 | 0.522071 |
| ATF7IP2      | 0.091674 | 1.75E-09 | 9.12E-11 | -0.11874 | 0.459709 | 0.578451 |
| ATP10D       | 1.21E-05 | 0.055229 | 2.61E-08 | 0.50504  | -0.23281 | -0.73785 |
| ATP6V0B      | 0.001882 | 1.78E-08 | 1.88E-10 | 0.161334 | -0.34873 | -0.51006 |
| ATP6V1F      | 0.000383 | 4.31E-07 | 7.00E-10 | 0.149779 | -0.3615  | -0.51128 |
| ATP8B2       | 0.007896 | 1.47E-05 | 1.51E-09 | 0.194801 | -0.31918 | -0.51398 |
| ATP8B4       | 6.71E-07 | 0.001322 | 8.13E-10 | 0.464459 | -0.295   | -0.75946 |
| AURKA        | 0.145789 | 1.66E-05 | 1.78E-07 | 0.103488 | -0.4903  | -0.59379 |
| AVPR1A       | 0.04831  | 1.86E-06 | 8.13E-10 | -0.26129 | 0.660542 | 0.921834 |

|          |          |          |          |          |          |          |
|----------|----------|----------|----------|----------|----------|----------|
| AX747132 | 0.053563 | 0.001737 | 1.50E-05 | -0.21018 | 0.42839  | 0.638568 |
| AX747135 | 0.000547 | 2.87E-06 | 2.08E-10 | -0.18882 | 0.329118 | 0.517936 |
| AZGP1    | 0.00101  | 1.75E-09 | 5.62E-11 | -0.18537 | 0.467848 | 0.653214 |
| B3GAT1   | 0.157227 | 2.75E-05 | 3.52E-08 | -0.19203 | 0.748515 | 0.940542 |
| BAAT     | 0.034291 | 9.89E-08 | 4.23E-09 | -0.15501 | 0.510721 | 0.66573  |
| BACE2    | 3.61E-09 | 3.93E-10 | 1.57E-11 | 0.483326 | -0.6857  | -1.16903 |
| BAG3     | 0.006907 | 7.28E-05 | 7.70E-10 | 0.250181 | -0.33673 | -0.58691 |
| BAMBI    | 0.022024 | 3.99E-07 | 1.76E-08 | 0.216391 | -0.65791 | -0.8743  |
| BARD1    | 3.60E-05 | 2.26E-10 | 2.04E-11 | 0.253006 | -0.55579 | -0.8088  |
| BATF     | 0.000559 | 6.09E-05 | 1.43E-09 | 0.241679 | -0.34531 | -0.58699 |
| BATF2    | 2.65E-05 | 0.002175 | 1.29E-09 | 0.30161  | -0.33089 | -0.6325  |
| BAX      | 6.64E-05 | 0.001264 | 1.58E-08 | 0.36497  | -0.32994 | -0.69491 |
| BAZ1A    | 1.95E-05 | 0.004011 | 4.71E-08 | 0.355456 | -0.24572 | -0.60118 |
| BBOX1    | 0.018194 | 4.31E-07 | 2.42E-09 | -0.20609 | 1.054804 | 1.260898 |
| BBS12    | 0.000493 | 0.000177 | 4.91E-09 | 0.304732 | -0.38459 | -0.68932 |
| BBS7     | 3.07E-05 | 0.00052  | 1.29E-09 | 0.251651 | -0.29661 | -0.54826 |
| BC034319 | 0.003419 | 7.59E-08 | 1.99E-10 | 0.285724 | -0.82921 | -1.11493 |
| BC038731 | 0.985643 | 1.02E-06 | 4.75E-07 | 0.001177 | 0.546003 | 0.544826 |
| BC040327 | 0.92733  | 1.37E-07 | 1.38E-07 | 0.015908 | 0.633685 | 0.617776 |
| BCAT1    | 0.00032  | 9.93E-09 | 1.60E-11 | 0.313185 | -0.63244 | -0.94563 |
| BCHE     | 0.441277 | 1.08E-08 | 3.11E-09 | -0.07605 | 0.952276 | 1.028323 |
| BCL11B   | 1.51E-05 | 1.86E-06 | 1.72E-11 | 0.361539 | -0.44108 | -0.80261 |
| BCL2A1   | 7.73E-09 | 4.37E-06 | 1.85E-11 | 0.763323 | -0.81749 | -1.58082 |
| BEX1     | 0.031573 | 0.001517 | 1.02E-06 | 0.235548 | -0.47896 | -0.7145  |
| BEX2     | 0.001239 | 2.27E-07 | 2.56E-10 | 0.322954 | -0.98776 | -1.31071 |
| BEX4     | 7.05E-05 | 2.00E-06 | 5.62E-11 | 0.467371 | -0.51309 | -0.98046 |
| BEX5     | 0.184388 | 0.0007   | 4.44E-06 | 0.130975 | -0.43661 | -0.56758 |
| BICC1    | 1.55E-06 | 1.18E-06 | 3.73E-11 | 0.614099 | -0.94917 | -1.56327 |
| BIN2     | 5.57E-08 | 4.70E-06 | 7.58E-11 | 0.386356 | -0.41161 | -0.79796 |
| BIRC3    | 4.33E-09 | 2.00E-06 | 1.57E-11 | 0.615302 | -0.63005 | -1.24536 |
| BLM      | 0.292008 | 1.33E-08 | 1.36E-08 | 0.055505 | -0.4718  | -0.52731 |
| BLOC1S2  | 0.000159 | 1.37E-07 | 7.95E-11 | 0.209644 | -0.32994 | -0.53958 |
| BLVRA    | 9.91E-06 | 1.75E-09 | 2.78E-11 | 0.220619 | -0.45677 | -0.67739 |
| BMS1P20  | 0.138825 | 5.47E-10 | 1.06E-09 | 0.057548 | -0.4463  | -0.50384 |
| BORA     | 0.000193 | 6.97E-07 | 5.72E-10 | 0.218181 | -0.40349 | -0.62167 |
| BTG2     | 5.06E-05 | 2.59E-08 | 1.91E-11 | 0.192916 | -0.33326 | -0.52617 |
| BTK      | 2.82E-07 | 0.004364 | 7.28E-11 | 0.431134 | -0.26585 | -0.69699 |
| BTLA     | 0.00032  | 1.10E-06 | 1.27E-10 | 0.210433 | -0.49799 | -0.70842 |
| BTN3A2   | 6.10E-06 | 0.002175 | 6.34E-10 | 0.466736 | -0.37806 | -0.8448  |
| BTN3A3   | 9.91E-06 | 8.67E-05 | 7.58E-11 | 0.47623  | -0.48458 | -0.96081 |
| BUB1B    | 0.000173 | 2.68E-06 | 6.59E-11 | 0.555754 | -1.03955 | -1.5953  |
| C10orf54 | 7.02E-06 | 1.01E-09 | 1.72E-11 | 0.276042 | -0.47932 | -0.75536 |
| C11orf71 | 0.173653 | 2.15E-08 | 3.45E-09 | -0.09209 | 0.450413 | 0.5425   |
| C11orf80 | 9.77E-05 | 1.48E-06 | 1.41E-10 | 0.239226 | -0.3865  | -0.62572 |
| C11orf96 | 0.000214 | 0.01525  | 1.27E-06 | 0.321924 | -0.27475 | -0.59667 |
| C12orf4  | 9.47E-08 | 6.37E-08 | 2.31E-11 | 0.318773 | -0.36667 | -0.68545 |
| C12orf5  | 4.11E-07 | 2.98E-12 | 1.57E-11 | 0.652547 | -0.96885 | -1.6214  |
| C12orf75 | 2.16E-07 | 5.00E-09 | 2.38E-11 | 0.817039 | -1.05633 | -1.87337 |
| C14orf13 | 0.243262 | 1.38E-06 | 1.28E-07 | -0.08998 | 0.481075 | 0.571055 |
| C15orf43 | 0.789185 | 0.000144 | 4.08E-06 | 0.017023 | 0.514939 | 0.497915 |
| C15orf48 | 4.36E-08 | 1.62E-07 | 1.57E-11 | 0.962543 | -1.36771 | -2.33025 |
| C15orf52 | 0.008205 | 0.005168 | 1.70E-07 | 0.251987 | -0.32447 | -0.57645 |
| C16orf54 | 3.61E-09 | 4.67E-07 | 1.70E-11 | 0.858306 | -0.81117 | -1.66948 |
| C17orf67 | 0.015305 | 1.13E-05 | 5.73E-09 | -0.18163 | 0.338528 | 0.52016  |
| C1orf106 | 0.023556 | 1.34E-05 | 8.13E-10 | 0.264149 | -1.03084 | -1.29499 |
| C1orf162 | 1.73E-05 | 1.29E-05 | 3.58E-10 | 0.341705 | -0.46506 | -0.80676 |
| C1orf198 | 0.00047  | 1.77E-07 | 4.72E-11 | 0.300412 | -0.66498 | -0.96539 |
| C1orf216 | 4.90E-05 | 0.010949 | 1.23E-09 | 0.365339 | -0.26672 | -0.63206 |

|              |          |          |          |          |          |          |
|--------------|----------|----------|----------|----------|----------|----------|
| C1orf54      | 8.05E-07 | 1.10E-06 | 1.79E-10 | 0.40577  | -0.56916 | -0.97493 |
| C1QA         | 5.70E-05 | 3.74E-05 | 2.30E-09 | 0.382279 | -0.47056 | -0.85284 |
| C1QB         | 5.66E-06 | 8.10E-06 | 4.72E-11 | 0.456586 | -0.63986 | -1.09645 |
| C1QC         | 5.42E-07 | 0.000189 | 2.66E-10 | 0.441943 | -0.40042 | -0.84236 |
| C1R          | 0.195725 | 7.59E-08 | 6.26E-08 | -0.05406 | 0.471725 | 0.525786 |
| C3AR1        | 4.87E-09 | 7.57E-06 | 1.70E-11 | 0.543291 | -0.45659 | -0.99988 |
| C3P1         | 3.49E-05 | 3.53E-10 | 1.85E-11 | -0.22786 | 0.651743 | 0.8796   |
| C4orf48      | 0.002778 | 6.10E-10 | 2.96E-11 | 0.182137 | -0.57143 | -0.75356 |
| C5AR1        | 0.000412 | 2.31E-06 | 4.97E-11 | 0.332175 | -0.59495 | -0.92713 |
| C5orf27      | 0.339892 | 5.73E-05 | 1.79E-06 | -0.33709 | 1.635289 | 1.97238  |
| C6           | 0.036005 | 1.08E-08 | 1.00E-09 | -0.08608 | 0.453343 | 0.539424 |
| C7           | 1.20E-06 | 0.001322 | 4.67E-09 | 0.572392 | -0.57869 | -1.15108 |
| C7orf31      | 8.99E-06 | 0.000211 | 1.48E-10 | 0.320166 | -0.27375 | -0.59391 |
| C7orf55      | 0.002498 | 3.07E-06 | 7.00E-10 | -0.18713 | 0.366005 | 0.553134 |
| C8A          | 0.000183 | 5.86E-08 | 1.21E-10 | -0.1969  | 0.472061 | 0.668965 |
| C8B          | 0.020901 | 1.97E-08 | 1.01E-10 | -0.16324 | 0.486112 | 0.649349 |
| C8orf46      | 0.738611 | 7.59E-08 | 1.96E-07 | -0.02309 | 0.499167 | 0.522253 |
| C9orf152     | 0.041384 | 0.006112 | 2.89E-06 | 0.27219  | -0.69523 | -0.96742 |
| CACNA1       | 0.000559 | 8.31E-10 | 2.68E-11 | -0.19982 | 0.365581 | 0.565397 |
| CALHM2       | 1.24E-07 | 1.58E-09 | 1.57E-11 | 0.282232 | -0.40355 | -0.68578 |
| CAP1         | 2.23E-06 | 2.51E-11 | 1.57E-11 | 0.206467 | -0.36441 | -0.57087 |
| CAP2         | 0.000357 | 2.29E-05 | 1.27E-10 | 0.379671 | -0.54705 | -0.92672 |
| CAPG         | 0.000817 | 8.73E-07 | 4.97E-11 | 0.349186 | -0.8114  | -1.16058 |
| CAPN2        | 0.000506 | 3.66E-07 | 2.19E-10 | 0.262515 | -0.45158 | -0.7141  |
| CAPN3        | 0.099526 | 6.85E-05 | 2.13E-06 | -0.16501 | 0.504254 | 0.669268 |
| CAPN5        | 0.375158 | 2.09E-07 | 3.18E-08 | -0.06556 | 0.458216 | 0.523779 |
| CAPNS1       | 0.00022  | 1.56E-05 | 1.23E-09 | 0.233732 | -0.31049 | -0.54423 |
| CARD16       | 2.16E-07 | 8.14E-12 | 1.57E-11 | 0.323814 | -0.62334 | -0.94715 |
| CARD6        | 7.02E-06 | 9.93E-09 | 1.57E-11 | 0.287528 | -0.42912 | -0.71665 |
| CASC10       | 0.237804 | 5.44E-09 | 4.67E-09 | -0.07881 | 0.517406 | 0.596211 |
| CASP1        | 2.91E-09 | 2.98E-12 | 1.57E-11 | 0.499988 | -0.79719 | -1.29717 |
| CASP4        | 6.84E-05 | 1.37E-07 | 3.48E-11 | 0.276668 | -0.41498 | -0.69165 |
| CAV2         | 0.313409 | 2.68E-06 | 4.03E-09 | 0.116503 | -0.40741 | -0.52391 |
| CBFA2T3      | 0.329836 | 7.57E-06 | 8.90E-07 | -0.11837 | 0.474057 | 0.592432 |
| CBLN4        | 0.159189 | 6.97E-07 | 6.01E-10 | -0.11332 | 0.400463 | 0.513781 |
| CBS          | 6.84E-05 | 9.89E-08 | 7.95E-11 | -0.21726 | 0.387696 | 0.604953 |
| CCDC102<br>B | 0.078071 | 2.93E-05 | 4.71E-08 | 0.138203 | -0.56433 | -0.70254 |
| CCDC109<br>B | 2.02E-08 | 9.89E-08 | 2.38E-11 | 0.461212 | -0.65897 | -1.12018 |
| CCDC146      | 1.77E-05 | 2.91E-09 | 1.57E-11 | 0.458033 | -1.06229 | -1.52032 |
| CCDC3        | 0.003419 | 0.000447 | 4.07E-08 | 0.235997 | -0.37214 | -0.60814 |
| CCDC80       | 8.72E-05 | 0.000495 | 3.45E-09 | 0.229229 | -0.32709 | -0.55632 |
| CCL14        | 0.003011 | 1.06E-05 | 1.29E-09 | -0.234   | 0.456806 | 0.690803 |
| CCL18        | 3.25E-06 | 0.001043 | 4.19E-10 | 0.759524 | -0.78322 | -1.54274 |
| CCL19        | 1.87E-07 | 0.000293 | 5.62E-11 | 1.525011 | -1.12727 | -2.65228 |
| CCL2         | 9.18E-09 | 1.01E-09 | 1.57E-11 | 0.789567 | -1.11465 | -1.90421 |
| CCL20        | 5.53E-05 | 1.06E-10 | 1.60E-11 | 0.74879  | -2.23191 | -2.9807  |
| CCL21        | 4.82E-07 | 1.13E-05 | 5.42E-11 | 1.047432 | -1.16348 | -2.21091 |
| CCL3         | 8.66E-07 | 2.93E-05 | 1.00E-09 | 0.695809 | -0.77796 | -1.47377 |
| CCL3L1       | 8.66E-07 | 2.93E-05 | 1.00E-09 | 0.695809 | -0.77796 | -1.47377 |
| CCL3L3       | 8.66E-07 | 2.93E-05 | 1.00E-09 | 0.695809 | -0.77796 | -1.47377 |
| CCL4         | 2.16E-08 | 2.49E-06 | 7.58E-11 | 0.720344 | -0.84208 | -1.56243 |
| CCL5         | 2.82E-08 | 1.48E-07 | 1.82E-11 | 0.830259 | -0.85257 | -1.68283 |
| CCL8         | 5.87E-05 | 3.12E-05 | 8.59E-10 | 0.736104 | -1.02767 | -1.76378 |
| CCNA2        | 2.58E-05 | 5.97E-07 | 2.31E-11 | 0.422043 | -0.88561 | -1.30765 |
| CCNB1        | 0.000506 | 7.36E-09 | 1.91E-11 | 0.341774 | -1.06659 | -1.40837 |
| CCND1        | 0.00052  | 0.000423 | 6.01E-10 | 0.53938  | -0.5666  | -1.10598 |

|              |          |          |          |          |          |          |
|--------------|----------|----------|----------|----------|----------|----------|
| CCNE2        | 0.000238 | 2.00E-06 | 4.45E-09 | 0.19523  | -0.52819 | -0.72342 |
| CCR1         | 3.25E-06 | 0.000109 | 9.52E-10 | 0.37821  | -0.43952 | -0.81773 |
| CCR2         | 1.10E-09 | 4.16E-08 | 1.64E-11 | 0.464722 | -0.50833 | -0.97306 |
| CCR5         | 1.24E-07 | 3.66E-07 | 1.72E-11 | 0.611187 | -0.67565 | -1.28684 |
| CCR7         | 4.13E-06 | 0.012567 | 1.41E-10 | 0.452874 | -0.37545 | -0.82832 |
| CCRL2        | 0.00011  | 3.74E-05 | 1.59E-09 | 0.340271 | -0.58379 | -0.92406 |
| CCS          | 0.002021 | 3.24E-09 | 1.64E-11 | -0.18236 | 0.45245  | 0.634808 |
| CCT6A        | 0.014018 | 1.06E-10 | 1.27E-10 | 0.176471 | -0.40007 | -0.57654 |
| CD163        | 0.000281 | 0.008079 | 9.52E-09 | 0.359585 | -0.29853 | -0.65812 |
| CD163L1      | 0.009859 | 4.49E-05 | 4.91E-09 | 0.233822 | -0.48947 | -0.72329 |
| CD1E         | 2.02E-07 | 0.305266 | 2.98E-07 | 0.422162 | -0.17331 | -0.59547 |
| CD2          | 4.42E-09 | 2.39E-09 | 1.57E-11 | 0.838478 | -0.91418 | -1.75265 |
| CD200        | 0.000392 | 0.000115 | 1.11E-08 | 0.232164 | -0.42577 | -0.65793 |
| CD226        | 0.006506 | 0.00199  | 6.50E-07 | 0.18155  | -0.33993 | -0.52148 |
| CD24         | 7.18E-07 | 3.66E-07 | 2.68E-11 | 0.939398 | -1.32566 | -2.26506 |
| CD247        | 2.55E-06 | 0.000103 | 1.43E-09 | 0.408987 | -0.40353 | -0.81252 |
| CD27         | 3.97E-07 | 2.00E-06 | 2.96E-11 | 0.612245 | -0.78168 | -1.39392 |
| CD300LF      | 1.77E-05 | 2.49E-06 | 2.68E-11 | 0.517055 | -0.7854  | -1.30245 |
| CD38         | 1.38E-05 | 1.60E-06 | 1.15E-10 | 0.393429 | -0.76838 | -1.16181 |
| CD3D         | 1.99E-08 | 1.78E-08 | 1.57E-11 | 0.655444 | -0.89176 | -1.5472  |
| CD3G         | 0.000114 | 1.73E-06 | 5.42E-11 | 0.342469 | -0.6318  | -0.97427 |
| CD44         | 8.15E-09 | 4.37E-06 | 1.69E-11 | 0.30323  | -0.33491 | -0.63814 |
| CD48         | 6.58E-09 | 8.10E-06 | 1.72E-11 | 0.50738  | -0.42961 | -0.93699 |
| CD52         | 7.73E-09 | 7.36E-09 | 1.64E-11 | 0.85242  | -0.9544  | -1.80682 |
| CD53         | 3.36E-06 | 5.79E-06 | 7.58E-11 | 0.25126  | -0.30383 | -0.55509 |
| CD58         | 1.73E-07 | 6.10E-10 | 1.57E-11 | 0.270466 | -0.37725 | -0.64772 |
| CD5L         | 1.77E-05 | 0.289685 | 2.66E-06 | 0.445797 | -0.20393 | -0.64972 |
| CD69         | 7.43E-09 | 6.37E-08 | 2.21E-11 | 0.776376 | -0.8436  | -1.61998 |
| CD72         | 9.97E-07 | 0.000236 | 6.94E-11 | 0.863686 | -0.82985 | -1.69354 |
| CD74         | 9.58E-07 | 1.73E-06 | 7.58E-11 | 0.292396 | -0.4179  | -0.71029 |
| CD83         | 2.74E-05 | 8.17E-05 | 2.92E-10 | 0.354603 | -0.49052 | -0.84513 |
| CD86         | 1.94E-07 | 0.00018  | 1.79E-10 | 0.426551 | -0.44977 | -0.87632 |
| CD8A         | 3.70E-09 | 5.44E-09 | 1.57E-11 | 0.960547 | -1.11049 | -2.07104 |
| CD96         | 1.77E-05 | 2.65E-09 | 1.60E-11 | 0.285528 | -0.62092 | -0.90645 |
| CD97         | 6.22E-08 | 2.89E-07 | 2.21E-11 | 0.478461 | -0.48849 | -0.96695 |
| CDA          | 0.012307 | 0.001095 | 7.59E-08 | -0.25192 | 0.397409 | 0.649326 |
| CDC20        | 0.018194 | 9.89E-08 | 1.41E-10 | 0.280623 | -1.06538 | -1.346   |
| CDC25B       | 0.000183 | 6.09E-05 | 1.43E-09 | 0.28452  | -0.39398 | -0.6785  |
| CDC42EP<br>3 | 6.94E-08 | 5.97E-07 | 3.07E-11 | 0.361942 | -0.41738 | -0.77933 |
| CDC42EP<br>5 | 0.004376 | 0.05377  | 2.79E-05 | 0.224061 | -0.33454 | -0.5586  |
| CDC42SE<br>1 | 0.000348 | 5.39E-05 | 8.13E-10 | 0.223962 | -0.28467 | -0.50863 |
| CDC42SE<br>2 | 5.09E-06 | 9.89E-06 | 2.96E-11 | 0.222051 | -0.31919 | -0.54124 |
| CDC45        | 0.017877 | 1.28E-06 | 6.68E-10 | 0.151578 | -0.53727 | -0.68885 |
| CDC6         | 0.031573 | 2.18E-09 | 3.07E-10 | 0.202736 | -1.23233 | -1.43506 |
| CDC7         | 2.25E-07 | 1.78E-11 | 1.57E-11 | 0.504037 | -1.11007 | -1.61411 |
| CDCA3        | 0.029467 | 2.58E-05 | 3.87E-08 | 0.1477   | -0.48228 | -0.62998 |
| CDCA5        | 0.011857 | 1.10E-06 | 1.36E-09 | 0.207187 | -0.5652  | -0.77239 |
| CDCA7L       | 0.015866 | 0.000667 | 1.87E-07 | 0.200384 | -0.31818 | -0.51856 |
| CDH11        | 0.002065 | 3.74E-05 | 1.87E-09 | 0.198908 | -0.40691 | -0.60582 |
| CDHR2        | 0.123413 | 0.090918 | 0.000164 | 0.28828  | -0.39173 | -0.68001 |
| CDHR5        | 0.989666 | 2.15E-06 | 1.44E-06 | -0.00533 | 0.557153 | 0.562478 |
| CDK1         | 0.000329 | 5.86E-08 | 2.87E-11 | 0.347643 | -0.87295 | -1.22059 |
| CDK3         | 0.026568 | 4.31E-07 | 5.16E-10 | -0.1525  | 0.363694 | 0.516196 |
| CDKN1A       | 0.000226 | 9.69E-05 | 2.66E-10 | 0.52066  | -0.53737 | -1.05803 |

|                   |          |          |          |          |          |          |
|-------------------|----------|----------|----------|----------|----------|----------|
| CDKN1C            | 0.000644 | 0.001517 | 2.15E-07 | 0.230811 | -0.30428 | -0.53509 |
| CDKN2C            | 0.000259 | 8.10E-06 | 3.45E-09 | 0.29663  | -0.38524 | -0.68187 |
| CDKN3             | 0.000412 | 1.26E-07 | 1.70E-11 | 0.53367  | -1.15027 | -1.68394 |
| CDO1              | 0.180039 | 3.14E-07 | 7.01E-09 | -0.08932 | 0.476803 | 0.566125 |
| CECR1             | 6.54E-09 | 2.43E-05 | 2.58E-11 | 0.707656 | -0.64328 | -1.35093 |
| CECR2             | 0.138825 | 2.35E-08 | 1.51E-08 | -0.064   | 0.49728  | 0.561283 |
| CELF2             | 5.80E-08 | 5.04E-06 | 2.13E-11 | 0.389818 | -0.36969 | -0.7595  |
| CENPA             | 0.165459 | 3.98E-05 | 1.41E-07 | 0.088008 | -0.46793 | -0.55594 |
| CENPE             | 0.043338 | 4.70E-06 | 8.19E-09 | 0.169362 | -0.61457 | -0.78393 |
| CENPH             | 0.001294 | 9.47E-07 | 3.07E-11 | 0.297117 | -0.52596 | -0.82308 |
| CENPK             | 8.17E-08 | 3.82E-06 | 1.72E-11 | 0.637558 | -1.00418 | -1.64174 |
| CENPM             | 0.002107 | 3.66E-07 | 4.19E-10 | 0.28097  | -0.6408  | -0.92177 |
| CENPU             | 2.08E-06 | 3.79E-06 | 1.95E-11 | 0.574181 | -0.84726 | -1.42144 |
| CENPW             | 0.002107 | 1.16E-07 | 1.01E-10 | 0.304118 | -0.75864 | -1.06276 |
| CEP55             | 0.050946 | 7.57E-06 | 2.89E-08 | 0.131632 | -0.62845 | -0.76009 |
| CES3              | 0.006506 | 5.36E-08 | 1.96E-09 | -0.14037 | 0.455295 | 0.595665 |
| CES4A             | 0.126878 | 1.86E-06 | 1.36E-08 | -0.13073 | 0.493607 | 0.624332 |
| CES5A             | 0.803395 | 1.02E-06 | 5.70E-08 | -0.0366  | 0.650155 | 0.686754 |
| CFD               | 0.000266 | 0.00047  | 2.14E-08 | 0.403854 | -0.40864 | -0.8125  |
| CFHR3             | 0.829996 | 7.28E-05 | 4.82E-06 | -0.09256 | 0.641016 | 0.733574 |
| CFHR4             | 0.621852 | 9.17E-05 | 3.01E-05 | -0.03556 | 0.78869  | 0.824254 |
| CFHR5             | 0.198047 | 8.20E-09 | 5.72E-10 | -0.10619 | 0.820779 | 0.926964 |
| CFTR              | 2.43E-05 | 3.99E-07 | 4.91E-10 | 0.178919 | -0.3502  | -0.52912 |
| CGN               | 0.033731 | 2.48E-10 | 9.01E-10 | -0.17299 | 0.631567 | 0.804553 |
| CH17-<br>132F21.1 | 6.03E-07 | 0.000575 | 5.45E-10 | 0.599582 | -0.64625 | -1.24583 |
| CH25H             | 0.000101 | 2.46E-07 | 1.64E-10 | 0.466501 | -1.09315 | -1.55965 |
| CHAD              | 0.031057 | 4.67E-07 | 2.81E-09 | -0.16139 | 0.482806 | 0.644194 |
| CHEK2             | 0.180039 | 0.000605 | 5.69E-06 | 0.145654 | -0.47461 | -0.62026 |
| CHI3L1            | 0.259771 | 0.050673 | 0.000902 | 0.329198 | -0.71074 | -1.03994 |
| CHMP3             | 4.48E-05 | 2.39E-09 | 2.78E-11 | 0.198818 | -0.34844 | -0.54726 |
| CHRD11            | 0.002605 | 0.884498 | 0.000527 | 0.552365 | 0.022068 | -0.5303  |
| CHST11            | 2.16E-08 | 1.61E-08 | 1.57E-11 | 0.308184 | -0.42774 | -0.73592 |
| CHST4             | 4.29E-06 | 5.39E-06 | 1.88E-10 | 0.766843 | -1.04197 | -1.80881 |
| CHST9             | 0.010626 | 2.46E-07 | 1.72E-10 | 0.478286 | -1.15251 | -1.63079 |
| CHSY1             | 5.02E-07 | 3.99E-07 | 2.49E-11 | 0.419516 | -0.40651 | -0.82603 |
| CIDEB             | 0.003492 | 2.81E-10 | 3.48E-11 | -0.14596 | 0.451538 | 0.597494 |
| CKAP2             | 3.61E-09 | 2.67E-07 | 1.01E-10 | 0.389639 | -0.54645 | -0.93609 |
| CKLF              | 3.32E-08 | 2.18E-09 | 4.10E-11 | 0.302552 | -0.49373 | -0.79628 |
| CKLF-<br>CMTM1    | 1.17E-05 | 1.61E-08 | 5.92E-11 | 0.334424 | -0.5197  | -0.85413 |
| CKMT2             | 0.046156 | 0.006897 | 3.60E-07 | 0.266854 | -0.27742 | -0.54427 |
| CKS2              | 2.58E-05 | 3.39E-07 | 7.28E-11 | 0.526557 | -0.78298 | -1.30954 |
| CLDN10            | 2.80E-05 | 0.000249 | 1.06E-08 | 0.468473 | -0.57347 | -1.04194 |
| CLDN11            | 2.43E-05 | 1.58E-09 | 1.69E-11 | 0.275012 | -0.54656 | -0.82157 |
| CLDN14            | 0.07627  | 5.00E-09 | 1.29E-09 | -0.12412 | 0.759695 | 0.883815 |
| CLDN7             | 0.014508 | 8.07E-07 | 1.99E-10 | 0.246508 | -0.68749 | -0.93399 |
| CLEC11A           | 7.94E-05 | 0.0007   | 2.47E-07 | 0.219288 | -0.31091 | -0.5302  |
| CLEC2B            | 0.000838 | 0.000293 | 6.68E-09 | 0.276529 | -0.3711  | -0.64763 |
| CLEC2D            | 1.14E-07 | 8.20E-09 | 1.57E-11 | 0.23425  | -0.41862 | -0.65287 |
| CLEC4A            | 6.03E-09 | 6.47E-07 | 1.58E-11 | 0.418479 | -0.53094 | -0.94942 |
| CLEC7A            | 8.95E-08 | 5.79E-06 | 2.13E-11 | 0.319789 | -0.37269 | -0.69248 |
| CLIC1             | 8.95E-07 | 1.98E-10 | 2.21E-11 | 0.281256 | -0.4936  | -0.77485 |
| CLIC2             | 7.27E-06 | 0.000401 | 1.56E-10 | 0.43801  | -0.3838  | -0.82181 |
| CLIC3             | 0.003354 | 0.035109 | 1.51E-06 | 0.317455 | -0.27342 | -0.59088 |
| CLIC6             | 0.003865 | 7.48E-07 | 4.19E-10 | 0.272963 | -0.75028 | -1.02324 |
| CLIP4             | 3.49E-05 | 0.000136 | 2.56E-10 | 0.324869 | -0.3539  | -0.67877 |
| CMBL              | 0.003492 | 6.70E-10 | 1.01E-10 | -0.1295  | 0.414511 | 0.544013 |

|                       |          |          |          |          |          |          |
|-----------------------|----------|----------|----------|----------|----------|----------|
| CMPK2                 | 5.37E-05 | 0.006364 | 5.73E-09 | 0.565068 | -0.54237 | -1.10744 |
| CMTM7                 | 8.43E-08 | 7.36E-09 | 1.57E-11 | 0.283332 | -0.33658 | -0.61991 |
| CMTM8                 | 0.008345 | 6.28E-11 | 1.27E-10 | -0.12553 | 0.482992 | 0.608523 |
| CNDP1                 | 0.295169 | 3.12E-08 | 8.59E-10 | -0.18233 | 1.323628 | 1.505962 |
| CNGA1                 | 0.131933 | 1.02E-06 | 2.85E-07 | -0.15517 | 0.583313 | 0.738485 |
| CNOT6                 | 1.61E-06 | 0.001816 | 6.01E-10 | 0.32789  | -0.18923 | -0.51712 |
| CNRIP1                | 7.82E-06 | 8.17E-05 | 2.19E-10 | 0.346366 | -0.32628 | -0.67264 |
| COBLL1                | 0.418678 | 3.45E-08 | 1.11E-06 | 0.064534 | 0.524695 | 0.460161 |
| COL15A1               | 0.029978 | 0.181223 | 1.39E-05 | 0.456686 | -0.22917 | -0.68586 |
| COL16A1               | 0.003147 | 0.000136 | 3.52E-08 | 0.281537 | -0.4855  | -0.76704 |
| COL1A1                | 1.13E-05 | 7.37E-10 | 1.57E-11 | 0.410522 | -0.82676 | -1.23729 |
| COL1A2                | 1.14E-07 | 4.45E-10 | 1.57E-11 | 0.7349   | -1.2275  | -1.9624  |
| COL3A1                | 1.10E-08 | 5.00E-09 | 1.57E-11 | 0.705597 | -0.88923 | -1.59483 |
| COL4A1                | 0.000124 | 9.09E-09 | 1.82E-11 | 0.430439 | -0.98642 | -1.41685 |
| COL4A2                | 0.000612 | 1.75E-09 | 1.57E-11 | 0.370516 | -1.03326 | -1.40377 |
| COL4A4                | 0.000173 | 0.00018  | 9.52E-09 | 0.259035 | -0.35667 | -0.61571 |
| COL5A1                | 5.06E-05 | 2.65E-09 | 1.95E-11 | 0.358063 | -0.87681 | -1.23488 |
| COL5A2                | 0.00047  | 2.46E-07 | 9.63E-11 | 0.330817 | -0.65552 | -0.98634 |
| COL6A2                | 0.003956 | 0.003375 | 5.94E-07 | 0.220567 | -0.32495 | -0.54552 |
| COL6A3                | 3.14E-06 | 0.000136 | 7.00E-10 | 0.450652 | -0.51113 | -0.96178 |
| COMMD8                | 0.010441 | 6.20E-06 | 2.92E-10 | 0.191146 | -0.35584 | -0.54698 |
| COQ10A                | 0.364455 | 3.12E-08 | 2.68E-09 | -0.07593 | 0.565569 | 0.641498 |
| CORO1A                | 2.50E-09 | 8.20E-09 | 1.57E-11 | 0.688417 | -0.73065 | -1.41907 |
| CORO1C                | 0.00011  | 1.08E-08 | 7.95E-11 | 0.278688 | -0.467   | -0.74569 |
| COTL1                 | 5.87E-09 | 6.66E-06 | 2.38E-11 | 0.38442  | -0.39009 | -0.77451 |
| COX7A1                | 0.151509 | 0.003526 | 9.69E-06 | 0.197814 | -0.3126  | -0.51041 |
| CPA3                  | 0.07963  | 0.218279 | 0.000846 | 0.330455 | -0.36315 | -0.69361 |
| CPS1-IT1              | 0.870885 | 0.000947 | 0.000358 | 0.037056 | 0.638574 | 0.601518 |
| CPVL                  | 3.55E-07 | 2.29E-05 | 7.95E-11 | 0.504477 | -0.49027 | -0.99475 |
| CRIM1                 | 0.000376 | 0.000103 | 2.18E-09 | 0.36483  | -0.40908 | -0.77391 |
| CRIP1                 | 6.54E-09 | 0.000161 | 2.49E-11 | 0.806096 | -0.54103 | -1.34713 |
| CRISPLD2              | 0.002547 | 8.67E-05 | 4.67E-09 | 0.200177 | -0.33259 | -0.53277 |
| CRLF3                 | 8.67E-08 | 1.61E-08 | 1.69E-11 | 0.33984  | -0.39442 | -0.73426 |
| CRP                   | 0.564675 | 0.378944 | 0.038931 | 0.213756 | -0.38394 | -0.5977  |
| CRTAM                 | 4.87E-09 | 8.10E-06 | 1.85E-11 | 0.765792 | -0.68309 | -1.44888 |
| CRYAB                 | 0.001494 | 0.001816 | 4.45E-09 | 0.49313  | -0.4587  | -0.95183 |
| CRYBG3                | 2.58E-05 | 4.70E-06 | 1.27E-10 | 0.292405 | -0.3149  | -0.6073  |
| CSF1R                 | 7.51E-05 | 0.0002   | 1.06E-09 | 0.333485 | -0.3871  | -0.72059 |
| CSF2RB                | 2.50E-09 | 9.89E-06 | 1.57E-11 | 0.793921 | -0.67802 | -1.47194 |
| CST7                  | 1.73E-07 | 1.66E-05 | 1.88E-10 | 0.541383 | -0.59363 | -1.13501 |
| CTD-<br>2284J15.1     | 0.985643 | 1.02E-06 | 4.75E-07 | 0.001177 | 0.546003 | 0.544826 |
| CTD-<br>3080P12.      | 0.005249 | 4.77E-05 | 4.80E-09 | -0.27026 | 0.404381 | 0.674644 |
| CTD-<br>3193O13.<br>1 | 0.086703 | 3.29E-06 | 1.29E-08 | -0.14378 | 0.406159 | 0.549936 |
| CTGF                  | 0.019458 | 7.59E-08 | 8.59E-10 | 0.349155 | -1.00116 | -1.35031 |
| CTHRC1                | 0.007314 | 7.02E-08 | 1.21E-10 | 0.272561 | -1.12083 | -1.39339 |
| CTNNA3                | 0.053563 | 1.51E-10 | 3.48E-11 | -0.1864  | 0.632621 | 0.819018 |
| CTR9                  | 0.004844 | 1.90E-05 | 3.52E-08 | 0.240449 | -0.35326 | -0.59371 |
| CTSA                  | 0.00012  | 1.86E-06 | 3.23E-10 | 0.215178 | -0.34677 | -0.56195 |
| CTSC                  | 2.50E-09 | 3.63E-09 | 1.57E-11 | 0.521155 | -0.71698 | -1.23814 |
| CTSD                  | 0.001722 | 0.000324 | 2.05E-07 | 0.233725 | -0.28346 | -0.51718 |
| CTSK                  | 7.27E-06 | 6.09E-05 | 3.48E-11 | 0.427958 | -0.46497 | -0.89293 |
| CTSS                  | 2.87E-08 | 2.15E-05 | 1.95E-11 | 0.568779 | -0.49983 | -1.06861 |
| CTTNBP2<br>NL         | 5.15E-08 | 5.36E-08 | 1.69E-11 | 0.310075 | -0.3542  | -0.66428 |

|         |          |          |          |          |          |          |
|---------|----------|----------|----------|----------|----------|----------|
| CUX2    | 0.433505 | 0.001816 | 9.31E-06 | -0.24625 | 0.879356 | 1.125604 |
| CXCL1   | 1.51E-05 | 8.26E-08 | 1.57E-11 | 0.419573 | -0.80414 | -1.22371 |
| CXCL10  | 1.60E-07 | 4.31E-07 | 1.69E-11 | 1.496121 | -1.65118 | -3.1473  |
| CXCL11  | 1.29E-05 | 1.21E-05 | 4.10E-11 | 1.162141 | -1.69999 | -2.86213 |
| CXCL12  | 4.48E-05 | 6.20E-06 | 2.92E-10 | 0.295234 | -0.3662  | -0.66143 |
| CXCL13  | 0.005771 | 0.000381 | 4.75E-07 | 0.51657  | -1.25002 | -1.76659 |
| CXCL16  | 1.45E-06 | 0.000249 | 3.40E-10 | 0.341164 | -0.30445 | -0.64562 |
| CXCL2   | 0.09815  | 3.98E-05 | 1.28E-07 | -0.22933 | 0.549632 | 0.778964 |
| CXCL6   | 1.94E-07 | 3.63E-09 | 1.60E-11 | 1.207842 | -1.80193 | -3.00977 |
| CXCL8   | 0.000214 | 6.82E-12 | 1.57E-11 | 0.338272 | -1.26267 | -1.60095 |
| CXCL9   | 9.58E-07 | 3.74E-05 | 2.58E-11 | 1.54093  | -1.40556 | -2.94649 |
| CXCR4   | 8.05E-10 | 2.91E-09 | 1.57E-11 | 0.717908 | -0.80562 | -1.52353 |
| CXCR6   | 0.003865 | 2.89E-07 | 3.23E-10 | 0.166936 | -0.46817 | -0.63511 |
| CXorf23 | 1.61E-05 | 0.018189 | 5.17E-09 | 0.386994 | -0.20268 | -0.58968 |
| CXorf38 | 2.14E-06 | 9.69E-05 | 1.79E-10 | 0.275097 | -0.25544 | -0.53053 |
| CYAT1   | 4.64E-07 | 4.22E-05 | 5.45E-10 | 0.300084 | -0.30563 | -0.60571 |
| CYBRD1  | 0.000367 | 0.000115 | 9.52E-09 | 0.353444 | -0.42219 | -0.77563 |
| CYP11A1 | 0.061401 | 8.10E-06 | 7.79E-09 | 0.140666 | -0.50479 | -0.64545 |
| CYP1A1  | 0.066051 | 2.43E-05 | 0.004246 | 0.458662 | 1.261184 | 0.802521 |
| CYP1A2  | 0.630821 | 4.91E-08 | 2.05E-07 | 0.062668 | 0.901957 | 0.839289 |
| CYP26A1 | 0.382123 | 0.002077 | 0.000129 | -0.29809 | 0.963026 | 1.261119 |
| CYP2A13 | 0.004376 | 0.001517 | 1.23E-08 | -0.31558 | 0.391216 | 0.706795 |
| CYP2A6  | 0.000117 | 9.69E-05 | 1.79E-10 | -0.4521  | 0.544274 | 0.996376 |
| CYP2A7  | 0.000226 | 0.000144 | 1.79E-10 | -0.47015 | 0.535706 | 1.005851 |
| CYP2C19 | 0.378707 | 1.02E-06 | 5.68E-07 | -0.10783 | 1.641283 | 1.749117 |
| CYP2D7P | 0.09815  | 0.305266 | 0.002826 | -0.31601 | 0.281515 | 0.597521 |
| CYP39A1 | 0.044713 | 1.16E-07 | 6.34E-09 | -0.11133 | 0.520598 | 0.63193  |
| CYP3A4  | 0.202778 | 3.78E-08 | 1.29E-09 | -0.0815  | 0.687459 | 0.768958 |
| CYP3A43 | 0.396353 | 8.26E-08 | 6.68E-09 | -0.08643 | 0.693303 | 0.779732 |
| CYP3A7  | 0.144149 | 0.014191 | 4.53E-05 | 0.168648 | -0.37254 | -0.54118 |
| CYP4A11 | 0.112549 | 1.37E-07 | 6.68E-10 | -0.15894 | 0.65405  | 0.812989 |
| CYP4A22 | 0.169737 | 2.15E-06 | 2.54E-09 | -0.17165 | 0.647687 | 0.819336 |
| CYP4F12 | 0.002723 | 1.56E-05 | 4.91E-09 | -0.23452 | 0.424164 | 0.658684 |
| CYP4F3  | 0.207421 | 2.15E-08 | 8.62E-09 | -0.04923 | 0.454967 | 0.504199 |
| CYP7A1  | 0.993714 | 2.15E-05 | 6.71E-06 | 0.000509 | 2.346723 | 2.346213 |
| CYR61   | 0.003708 | 1.48E-06 | 7.28E-11 | 0.439079 | -0.84033 | -1.27941 |
| CYS1    | 0.000986 | 0.056842 | 2.40E-05 | 0.325768 | -0.31087 | -0.63664 |
| CYSLTR1 | 2.62E-07 | 2.43E-05 | 3.07E-11 | 0.288778 | -0.29624 | -0.58502 |
| CYTIP   | 2.44E-10 | 9.93E-09 | 1.57E-11 | 0.791313 | -0.77497 | -1.56628 |
| DACT1   | 3.93E-05 | 0.005863 | 1.11E-08 | 0.388687 | -0.41804 | -0.80673 |
| DAK     | 0.071056 | 1.66E-05 | 1.28E-07 | -0.14569 | 0.50573  | 0.651424 |
| DBF4    | 3.55E-07 | 3.14E-07 | 4.29E-11 | 0.431878 | -0.52007 | -0.95194 |
| DBH-AS1 | 0.031573 | 0.002077 | 4.08E-06 | -0.21827 | 0.536467 | 0.754737 |
| DBN1    | 0.004031 | 0.000153 | 2.36E-08 | 0.166793 | -0.35447 | -0.52126 |
| DBNDD2  | 1.62E-08 | 4.06E-06 | 5.17E-11 | 0.386218 | -0.38794 | -0.77416 |
| DCDC1   | 0.73427  | 0.003836 | 0.000125 | -0.10961 | 0.563417 | 0.673025 |
| DCDC2   | 1.77E-05 | 1.97E-08 | 2.38E-11 | 0.455946 | -0.95325 | -1.40919 |
| DCDC5   | 0.73427  | 0.003836 | 0.000125 | -0.10961 | 0.563417 | 0.673025 |
| DCK     | 1.28E-07 | 1.08E-08 | 1.82E-11 | 0.543014 | -0.64818 | -1.19119 |
| DCN     | 0.000198 | 9.89E-06 | 1.15E-10 | 0.21293  | -0.34702 | -0.55995 |
| DDB2    | 1.45E-06 | 0.227278 | 1.01E-08 | 0.614081 | -0.13404 | -0.74812 |
| DDIAS   | 0.019336 | 1.06E-05 | 2.36E-08 | 0.146619 | -0.41305 | -0.55967 |
| DDX26B  | 1.79E-08 | 6.66E-06 | 5.62E-11 | 0.554931 | -0.55606 | -1.11099 |
| DDX39A  | 8.05E-07 | 1.16E-10 | 1.57E-11 | 0.246994 | -0.39229 | -0.63928 |
| DDX60   | 1.95E-05 | 0.001666 | 1.78E-09 | 0.479409 | -0.45467 | -0.93408 |
| DEFB1   | 0.538916 | 0.000423 | 0.000511 | -0.12396 | -0.8839  | -0.75994 |
| DENND1  | 0.000778 | 9.69E-05 | 7.79E-09 | 0.201428 | -0.33449 | -0.53592 |

|         |          |          |          |          |          |          |
|---------|----------|----------|----------|----------|----------|----------|
| DENND2  | 0.00245  | 0.000211 | 1.96E-09 | 0.302211 | -0.31801 | -0.62022 |
| D       |          |          |          |          |          |          |
| DENND6  | 3.48E-06 | 0.0009   | 4.91E-10 | 0.341665 | -0.26679 | -0.60846 |
| A       |          |          |          |          |          |          |
| DEPDC1  | 0.414886 | 5.73E-05 | 3.29E-06 | 0.025538 | -0.49306 | -0.5186  |
| DEPDC1B | 0.000986 | 1.12E-09 | 1.57E-11 | 0.23844  | -0.86045 | -1.09889 |
| DFNA5   | 0.005359 | 1.66E-05 | 3.45E-09 | 0.22644  | -0.38138 | -0.60782 |
| DGAT2   | 0.038913 | 8.76E-12 | 1.91E-11 | -0.17003 | 0.708549 | 0.878582 |
| DHRS1   | 0.019458 | 7.74E-05 | 1.51E-08 | -0.16821 | 0.405858 | 0.574073 |
| DHRS2   | 0.433505 | 0.003375 | 0.000134 | -0.2205  | 0.957068 | 1.177568 |
| DHRS4-  |          |          |          |          |          |          |
| AS1     | 0.008995 | 9.09E-09 | 6.94E-11 | -0.14147 | 0.485306 | 0.626779 |
| DHRS9   | 1.25E-05 | 1.28E-06 | 3.21E-11 | 0.488552 | -0.72201 | -1.21056 |
| DIRAS3  | 0.091674 | 0.001737 | 7.29E-06 | -0.24274 | 0.632693 | 0.875437 |
| DKFZp66 |          |          |          |          |          |          |
| 7J0810  | 5.51E-09 | 2.03E-05 | 1.21E-10 | 1.185568 | -1.1474  | -2.33297 |
| DKK3    | 0.000208 | 2.68E-06 | 1.01E-10 | 0.308923 | -0.61669 | -0.92561 |
| DLEU1   | 0.118714 | 7.57E-06 | 5.70E-08 | -0.15297 | 0.466688 | 0.619655 |
| DLGAP5  | 2.14E-05 | 6.60E-06 | 4.72E-11 | 0.441396 | -1.05511 | -1.49651 |
| DMGDH   | 0.050444 | 1.26E-07 | 2.04E-08 | -0.06835 | 0.49762  | 0.565972 |
| DMXL2   | 0.000493 | 0.002378 | 2.36E-07 | 0.24361  | -0.25783 | -0.50144 |
| DNAJC12 | 0.002547 | 2.31E-06 | 2.79E-10 | -0.31687 | 0.578047 | 0.894913 |
| DNAJC25 | 0.065076 | 3.42E-11 | 1.85E-11 | -0.12126 | 0.627923 | 0.749184 |
| DNAJC25 |          |          |          |          |          |          |
| -GNG10  | 0.065076 | 3.42E-11 | 1.85E-11 | -0.12126 | 0.627923 | 0.749184 |
| DNAJC5B | 0.013013 | 4.67E-07 | 4.67E-09 | 0.154487 | -0.5637  | -0.71818 |
| DNM1    | 0.008345 | 0.21184  | 0.000121 | -0.42307 | 0.238342 | 0.661411 |
| DNM3OS  | 4.92E-06 | 0.006112 | 2.68E-09 | 0.36616  | -0.34304 | -0.7092  |
| DNMT1   | 7.49E-09 | 3.52E-07 | 2.87E-11 | 0.435626 | -0.42625 | -0.86187 |
| DNMT3L  | 0.034876 | 5.51E-07 | 2.08E-10 | -0.33002 | 0.887776 | 1.217795 |
| DOCK10  | 1.38E-07 | 0.000992 | 4.29E-11 | 0.395929 | -0.2851  | -0.68103 |
| DOCK11  | 6.52E-09 | 2.03E-05 | 1.69E-11 | 0.402957 | -0.42029 | -0.82324 |
| DOCK2   | 1.45E-06 | 1.56E-05 | 3.73E-11 | 0.255316 | -0.308   | -0.56331 |
| DOCK8   | 5.80E-08 | 1.48E-08 | 1.85E-11 | 0.37476  | -0.44894 | -0.8237  |
| DOK2    | 3.69E-06 | 5.39E-05 | 1.06E-09 | 0.301493 | -0.33212 | -0.63361 |
| DOK3    | 2.88E-05 | 6.09E-05 | 1.88E-10 | 0.231988 | -0.30863 | -0.54061 |
| DPT     | 1.50E-07 | 0.002077 | 4.91E-10 | 0.794786 | -0.71146 | -1.50625 |
| DPYSL2  | 1.60E-07 | 5.97E-07 | 1.77E-11 | 0.468996 | -0.42278 | -0.89177 |
| DRAM1   | 3.70E-09 | 3.12E-08 | 1.57E-11 | 0.529345 | -0.57292 | -1.10227 |
| DRAM2   | 0.000944 | 2.58E-05 | 4.67E-09 | 0.259411 | -0.28532 | -0.54473 |
| DSG1    | 0.954983 | 1.48E-08 | 6.88E-08 | 0.047833 | 0.920055 | 0.872223 |
| DSN1    | 0.003708 | 1.08E-08 | 5.17E-11 | 0.166469 | -0.50205 | -0.66851 |
| DTL     | 0.000117 | 1.12E-09 | 1.82E-11 | 0.448471 | -1.22269 | -1.67116 |
| DUSP2   | 0.006779 | 0.000121 | 8.19E-09 | 0.200105 | -0.33264 | -0.53275 |
| DYNLT1  | 1.04E-06 | 3.39E-12 | 1.85E-11 | 0.254383 | -0.49936 | -0.75374 |
| DZIP1   | 0.001758 | 1.21E-05 | 1.23E-09 | 0.237693 | -0.43933 | -0.67702 |
| E2F3    | 0.006643 | 3.53E-10 | 5.17E-11 | 0.143759 | -0.43901 | -0.58277 |
| E2F8    | 5.06E-05 | 4.67E-07 | 1.68E-11 | 0.458699 | -1.1206  | -1.57929 |
| EBI3    | 0.008827 | 0.001666 | 1.48E-07 | 0.216544 | -0.37469 | -0.59123 |
| EBPL    | 8.12E-06 | 2.87E-06 | 1.15E-10 | -0.2308  | 0.375215 | 0.606015 |
| ECHDC2  | 0.346657 | 7.48E-07 | 5.97E-08 | -0.1056  | 0.627292 | 0.732888 |
| ECT2    | 0.001326 | 1.16E-07 | 3.07E-11 | 0.154647 | -0.35828 | -0.51293 |
| EDNRB   | 0.000402 | 0.002273 | 4.49E-08 | 0.306633 | -0.23851 | -0.54514 |
| EFCAB7  | 0.00245  | 0.012232 | 4.12E-07 | 0.317214 | -0.2824  | -0.59962 |
| EFEMP1  | 6.26E-07 | 5.86E-08 | 1.95E-11 | 0.609605 | -1.03152 | -1.64112 |
| EFEMP2  | 0.000402 | 6.85E-05 | 8.62E-09 | 0.258947 | -0.40239 | -0.66134 |
| EFHD1   | 0.087816 | 2.75E-05 | 7.59E-08 | -0.3082  | 0.954922 | 1.263127 |
| EFNA1   | 0.041384 | 0.009067 | 1.21E-06 | -0.25618 | 0.403511 | 0.659687 |

|         |          |          |          |          |          |          |
|---------|----------|----------|----------|----------|----------|----------|
| EGR1    | 0.670883 | 0.00746  | 0.002011 | 0.135919 | -0.79918 | -0.9351  |
| EGR2    | 5.36E-08 | 1.66E-05 | 3.48E-11 | 0.55883  | -0.75063 | -1.30946 |
| EGR3    | 0.019115 | 2.00E-06 | 8.13E-10 | 0.200052 | -0.48591 | -0.68596 |
| ELF3    | 0.00011  | 5.73E-05 | 1.17E-09 | 0.289028 | -0.40512 | -0.69415 |
| ELF4    | 9.13E-08 | 7.57E-06 | 4.10E-11 | 0.348512 | -0.37038 | -0.71889 |
| ELOVL1  | 0.000169 | 2.16E-11 | 2.43E-11 | 0.200547 | -0.41529 | -0.61583 |
| ELOVL2  | 0.010243 | 1.66E-05 | 1.94E-08 | 0.273476 | -0.49063 | -0.7641  |
| ELOVL7  | 3.97E-06 | 6.47E-07 | 4.10E-11 | 0.712269 | -1.13806 | -1.85032 |
| EMILIN1 | 0.001192 | 0.000547 | 1.32E-06 | 0.24095  | -0.35083 | -0.59178 |
| EMP3    | 1.21E-05 | 4.06E-06 | 1.68E-09 | 0.356012 | -0.41215 | -0.76816 |
| EMR1    | 0.003572 | 0.09585  | 4.88E-05 | 0.417074 | -0.40663 | -0.82371 |
| EMR2    | 1.44E-07 | 0.009432 | 2.79E-10 | 0.429646 | -0.32796 | -0.75761 |
| ENDOD1  | 1.83E-05 | 2.67E-07 | 8.66E-11 | 0.293158 | -0.51108 | -0.80424 |
| ENHO    | 0.052034 | 9.05E-08 | 7.60E-10 | -0.24403 | 0.671875 | 0.915906 |
| ENPP1   | 0.600397 | 2.48E-10 | 1.29E-09 | -0.02253 | 0.546307 | 0.568837 |
| ENPP2   | 0.000376 | 7.10E-06 | 9.01E-10 | 0.575363 | -0.801   | -1.37636 |
| ENPP5   | 0.00465  | 1.47E-05 | 3.97E-10 | 0.229251 | -0.70093 | -0.93018 |
| ENPP7   | 0.001722 | 0.001901 | 5.94E-07 | 0.307968 | -0.34526 | -0.65323 |
| ENTPD1  | 1.38E-08 | 3.93E-10 | 1.57E-11 | 0.368809 | -0.65299 | -1.0218  |
| EOGT    | 1.80E-06 | 1.77E-07 | 1.27E-10 | 0.41598  | -0.47519 | -0.89117 |
| EOMES   | 1.02E-07 | 0.000992 | 1.27E-10 | 0.719179 | -0.4908  | -1.20998 |
| EPB41L2 | 7.47E-07 | 1.29E-05 | 4.72E-11 | 0.268339 | -0.25704 | -0.52538 |
| EPB41L3 | 5.60E-07 | 2.31E-06 | 1.70E-11 | 0.519936 | -0.56399 | -1.08393 |
| EPCAM   | 2.14E-06 | 1.06E-05 | 1.99E-10 | 1.270117 | -1.89577 | -3.16589 |
| EPDR1   | 3.36E-06 | 1.48E-08 | 2.04E-11 | 0.607969 | -0.79346 | -1.40143 |
| EPHA3   | 0.000134 | 0.00018  | 1.36E-09 | 0.269722 | -0.32004 | -0.58976 |
| EPHB1   | 0.012307 | 5.07E-05 | 3.28E-09 | -0.28995 | 0.490014 | 0.779969 |
| EPHX2   | 0.008613 | 2.34E-11 | 7.28E-11 | -0.17171 | 0.582237 | 0.753942 |
| EPSTI1  | 6.26E-07 | 0.000737 | 3.78E-10 | 0.673861 | -0.58706 | -1.26092 |
| ERAP2   | 0.006506 | 0.316607 | 0.001462 | 0.397428 | -0.11197 | -0.50939 |
| ERI1    | 5.46E-06 | 0.000211 | 5.45E-10 | 0.274509 | -0.2452  | -0.51971 |
| ERICH5  | 0.040115 | 0.000103 | 2.15E-07 | 0.250651 | -0.8013  | -1.05195 |
| ERMP1   | 0.000434 | 3.98E-05 | 1.87E-09 | 0.232041 | -0.30376 | -0.5358  |
| ERP27   | 0.021653 | 8.07E-07 | 6.01E-10 | 0.167309 | -0.51906 | -0.68637 |
| ERRFI1  | 0.036612 | 4.37E-06 | 1.11E-08 | -0.17354 | 0.636877 | 0.810416 |
| ESRP1   | 0.10091  | 0.001095 | 1.71E-06 | 0.198195 | -0.6908  | -0.88899 |
| ETNK2   | 0.014761 | 1.10E-06 | 5.16E-10 | -0.22499 | 0.681728 | 0.906719 |
| ETV7    | 0.003419 | 3.39E-07 | 4.29E-11 | 0.274433 | -0.76372 | -1.03815 |
| EVI2A   | 1.09E-09 | 4.91E-08 | 1.57E-11 | 0.821724 | -0.80237 | -1.62409 |
| EVI2B   | 2.50E-09 | 1.60E-06 | 1.77E-11 | 0.670683 | -0.55209 | -1.22277 |
| EXOC1   | 6.90E-07 | 1.47E-05 | 2.79E-10 | 0.295727 | -0.21031 | -0.50604 |
| EXPH5   | 1        | 2.65E-09 | 3.52E-08 | 0.006607 | 0.515637 | 0.50903  |
| EZH2    | 4.36E-08 | 1.10E-06 | 3.59E-11 | 0.65937  | -0.76973 | -1.4291  |
| F11     | 0.212411 | 4.16E-08 | 4.07E-08 | -0.13564 | 0.418724 | 0.554368 |
| F13A1   | 0.042025 | 0.009432 | 1.14E-05 | 0.200584 | -0.47059 | -0.67117 |
| F2RL1   | 0.006252 | 1.33E-08 | 6.68E-10 | 0.299516 | -0.60586 | -0.90538 |
| F3      | 0.073191 | 5.73E-05 | 6.34E-09 | 0.147282 | -0.44864 | -0.59592 |
| FABP3   | 0.003147 | 0.047733 | 1.18E-05 | 0.282113 | -0.26943 | -0.55154 |
| FABP4   | 0.036005 | 0.088602 | 8.23E-06 | 0.288523 | -0.22751 | -0.51603 |
| FABP5   | 5.42E-07 | 1.62E-07 | 1.85E-11 | 1.073957 | -1.30963 | -2.38358 |
| FADS1   | 0.906416 | 0.029892 | 0.012631 | -0.00847 | -0.73118 | -0.7227  |
| FAIM    | 0.006506 | 6.10E-10 | 1.72E-11 | 0.292593 | -0.83148 | -1.12407 |
| FAIM3   | 5.57E-08 | 2.15E-05 | 1.27E-10 | 0.338523 | -0.37234 | -0.71086 |
| FAM102B | 5.17E-09 | 4.91E-10 | 1.57E-11 | 0.525673 | -0.56144 | -1.08712 |
| FAM111B | 0.05777  | 0.000121 | 1.78E-07 | 0.122603 | -0.52748 | -0.65008 |
| FAM122B | 5.87E-06 | 0.023046 | 1.85E-08 | 0.37467  | -0.14976 | -0.52443 |
| FAM124B | 0.387824 | 0.002481 | 0.00017  | -0.16297 | 0.453147 | 0.616113 |
| FAM127A | 0.285682 | 4.16E-08 | 2.25E-08 | 0.058268 | -0.44183 | -0.5001  |

|                   |          |          |          |          |          |          |
|-------------------|----------|----------|----------|----------|----------|----------|
| FAM129A           | 1.90E-09 | 3.39E-07 | 1.57E-11 | 0.666797 | -0.59384 | -1.26064 |
| FAM134B           | 0.002498 | 2.89E-07 | 4.97E-11 | -0.22637 | 0.501228 | 0.727594 |
| FAM150B           | 1.25E-05 | 0.003308 | 1.29E-08 | 0.742471 | -0.69788 | -1.44035 |
| FAM151A           | 0.021277 | 0.003375 | 2.33E-06 | -0.49205 | 0.828205 | 1.320252 |
| FAM169A           | 0.001162 | 5.79E-06 | 3.23E-10 | 0.47977  | -0.80509 | -1.28486 |
| FAM198A           | 0.017251 | 0.000249 | 2.75E-08 | -0.42608 | 0.746521 | 1.172606 |
| FAM213B           | 1.77E-07 | 1.33E-08 | 1.57E-11 | 0.375626 | -0.47348 | -0.84911 |
| FAM26F            | 0.001359 | 0.00052  | 1.43E-09 | 0.323714 | -0.53019 | -0.85391 |
| FAM3B             | 0.002723 | 2.15E-05 | 2.95E-09 | 0.574157 | -1.68212 | -2.25628 |
| FAM46C            | 0.000726 | 0.003104 | 1.41E-07 | 0.280596 | -0.28748 | -0.56808 |
| FAM49A            | 6.58E-09 | 2.31E-06 | 1.57E-11 | 0.421336 | -0.34813 | -0.76946 |
| FAM57A            | 0.003085 | 6.97E-07 | 1.79E-10 | 0.260286 | -0.54274 | -0.80303 |
| FAM60A            | 5.06E-05 | 3.03E-12 | 1.58E-11 | 0.217293 | -0.50178 | -0.71908 |
| FAM65B            | 1.11E-06 | 0.000249 | 1.96E-09 | 0.399643 | -0.3772  | -0.77685 |
| FAM72A            | 0.019115 | 1.06E-05 | 4.71E-08 | 0.247541 | -0.71551 | -0.96305 |
| FAM72B            | 0.019115 | 1.06E-05 | 4.71E-08 | 0.247541 | -0.71551 | -0.96305 |
| FAM72C            | 0.019115 | 1.06E-05 | 4.71E-08 | 0.247541 | -0.71551 | -0.96305 |
| FAM72D            | 0.019115 | 1.06E-05 | 4.71E-08 | 0.247541 | -0.71551 | -0.96305 |
| FAM78A            | 2.87E-08 | 1.66E-05 | 3.59E-11 | 0.397873 | -0.34797 | -0.74585 |
| FAM9B             | 0.000412 | 0.00199  | 1.87E-09 | -0.39678 | 0.302597 | 0.699377 |
| FANCI             | 0.002021 | 3.99E-07 | 1.41E-10 | 0.192743 | -0.46767 | -0.66041 |
| FAP               | 0.106522 | 6.97E-07 | 1.97E-05 | -0.15747 | -0.70627 | -0.54881 |
| FAR1              | 1.33E-08 | 9.89E-08 | 8.66E-11 | 0.337249 | -0.30991 | -0.64715 |
| FAS               | 7.85E-08 | 0.004958 | 8.66E-11 | 0.582528 | -0.26069 | -0.84322 |
| FAT1              | 3.58E-06 | 5.36E-08 | 3.73E-11 | 0.981608 | -1.22853 | -2.21014 |
| FBLN5             | 2.58E-05 | 0.000171 | 1.17E-09 | 0.633513 | -0.76635 | -1.39987 |
| FBN1              | 2.01E-05 | 9.93E-09 | 2.87E-11 | 0.341432 | -0.66003 | -1.00146 |
| FBXO6             | 0.001239 | 0.010949 | 2.47E-07 | 0.300957 | -0.2545  | -0.55545 |
| FCAMR             | 0.000159 | 0.010145 | 1.51E-08 | 0.950264 | -0.6474  | -1.59766 |
| FCER1G            | 3.25E-06 | 6.09E-05 | 2.31E-10 | 0.486622 | -0.53998 | -1.02661 |
| FCGR1A            | 1.56E-05 | 6.47E-07 | 2.49E-11 | 0.397077 | -0.64778 | -1.04485 |
| FCGR1B            | 2.25E-07 | 2.15E-08 | 1.57E-11 | 0.892939 | -1.35916 | -2.2521  |
| FCGR1C            | 5.42E-07 | 2.35E-08 | 1.60E-11 | 0.798109 | -1.24844 | -2.04655 |
| FCGR3A            | 0.005249 | 0.000277 | 1.87E-07 | 0.393691 | -0.69974 | -1.09343 |
| FCGR3B            | 0.003011 | 0.000115 | 8.62E-09 | 0.322945 | -0.57236 | -0.8953  |
| FCN1              | 2.72E-07 | 2.49E-06 | 8.66E-11 | 0.595238 | -0.86513 | -1.46036 |
| FCRL3             | 7.51E-05 | 0.000249 | 2.07E-09 | 0.344598 | -0.42396 | -0.76856 |
| FDXR              | 6.25E-05 | 0.002273 | 3.23E-10 | 0.389212 | -0.30735 | -0.69656 |
| FEN1              | 0.001758 | 8.31E-10 | 1.88E-10 | 0.223181 | -0.65061 | -0.87379 |
| FERMT3            | 4.36E-08 | 4.31E-07 | 1.69E-11 | 0.396241 | -0.50167 | -0.89791 |
| FGF13             | 0.011667 | 0.003104 | 2.25E-07 | 0.254454 | -0.53349 | -0.78795 |
| FGF14-<br>AS2     | 0.107949 | 3.98E-05 | 1.58E-08 | -0.11609 | 0.45577  | 0.571863 |
| FGL2              | 2.32E-08 | 1.26E-07 | 1.57E-11 | 0.522274 | -0.56635 | -1.08862 |
| FGR               | 2.02E-08 | 7.57E-06 | 3.36E-11 | 0.518865 | -0.43367 | -0.95253 |
| FHL2              | 0.001162 | 1.56E-05 | 6.01E-10 | 0.497559 | -0.80619 | -1.30375 |
| FHOD1             | 3.97E-06 | 8.71E-06 | 2.66E-10 | 0.223516 | -0.2894  | -0.51292 |
| FIG4              | 1.80E-06 | 5.04E-06 | 8.29E-11 | 0.254172 | -0.27782 | -0.532   |
| FIGNL1            | 7.30E-05 | 0.000136 | 2.66E-10 | 0.249885 | -0.269   | -0.51889 |
| FILIP1L           | 0.000232 | 2.34E-11 | 1.57E-11 | 0.234567 | -0.56002 | -0.79459 |
| FITM1             | 0.147574 | 5.97E-07 | 1.43E-08 | -0.18673 | 0.614001 | 0.80073  |
| FJX1              | 0.006128 | 3.66E-07 | 1.21E-10 | 0.188222 | -0.50861 | -0.69683 |
| FKBP11            | 0.008345 | 2.46E-07 | 7.70E-10 | 0.147769 | -0.36977 | -0.51754 |
| FKBP1A-<br>SDCBP2 | 0.522219 | 0.001205 | 2.79E-05 | 0.114173 | -0.80724 | -0.92141 |
| FKBP1B            | 0.074119 | 0.00297  | 6.11E-05 | 0.173115 | -0.36774 | -0.54086 |
| FLJ12120          | 0.013262 | 0.213997 | 0.000464 | 0.357477 | -0.21099 | -0.56847 |
| FLJ22763          | 0.883163 | 0.000308 | 0.000421 | 0.047295 | 0.513045 | 0.46575  |

|               |          |          |          |          |          |          |
|---------------|----------|----------|----------|----------|----------|----------|
| FLJ32255      | 0.000481 | 0.000342 | 2.42E-09 | 0.222292 | -0.35912 | -0.58141 |
| FLNA          | 0.000709 | 2.29E-05 | 5.43E-09 | 0.250213 | -0.38139 | -0.6316  |
| FLRT3         | 0.26255  | 3.79E-06 | 9.76E-05 | -0.17341 | -0.76787 | -0.59446 |
| FLVCR1        | 1.40E-06 | 3.98E-05 | 1.88E-10 | 0.455591 | -0.48028 | -0.93587 |
| FMO1          | 0.042025 | 0.000815 | 1.48E-07 | 0.505288 | -1.03158 | -1.53687 |
| FMO2          | 0.518097 | 2.15E-06 | 1.51E-08 | 0.11521  | -0.73461 | -0.84982 |
| FMO5          | 0.92867  | 8.21E-11 | 2.07E-09 | -0.0178  | 0.631521 | 0.649325 |
| FMOD          | 0.069979 | 2.75E-05 | 5.97E-08 | 0.149065 | -0.47082 | -0.61988 |
| FNDC1         | 0.003786 | 3.53E-06 | 1.88E-10 | 0.394949 | -1.16278 | -1.55773 |
| FNIP2         | 0.003865 | 8.10E-06 | 1.43E-09 | -0.30212 | 0.510502 | 0.812618 |
| FOLH1         | 0.013262 | 6.09E-05 | 8.36E-08 | -0.1496  | 0.45147  | 0.601071 |
| FOLH1B        | 0.036005 | 7.28E-05 | 1.35E-07 | -0.14159 | 0.573225 | 0.714816 |
| FOS           | 0.163463 | 0.009432 | 0.000394 | 0.188178 | -0.42774 | -0.61591 |
| FOXM1         | 0.011462 | 4.06E-06 | 6.01E-10 | 0.199827 | -0.65526 | -0.85509 |
| FOXQ1         | 0.468785 | 3.53E-05 | 8.14E-07 | 0.143303 | -0.9963  | -1.1396  |
| FPR3          | 9.47E-08 | 1.38E-05 | 1.82E-11 | 0.549698 | -0.55531 | -1.10501 |
| FRMD3         | 0.009684 | 3.12E-05 | 3.23E-10 | 0.17555  | -0.36834 | -0.54389 |
| FRMD6         | 9.27E-07 | 0.000109 | 1.41E-10 | 0.583334 | -0.45333 | -1.03666 |
| FSTL3         | 1.03E-05 | 1.26E-07 | 1.15E-10 | 0.263837 | -0.47963 | -0.74347 |
| FTCD          | 0.004206 | 1.01E-09 | 5.17E-11 | -0.18762 | 0.527173 | 0.714793 |
| FUNDC1        | 0.000922 | 0.000161 | 7.01E-09 | 0.246529 | -0.27299 | -0.51952 |
| FUT4          | 8.05E-10 | 3.17E-10 | 1.57E-11 | 0.422482 | -0.61347 | -1.03595 |
| FUT8          | 8.67E-08 | 1.30E-10 | 1.57E-11 | 0.271515 | -0.5024  | -0.77391 |
| FXD1          | 0.001643 | 5.44E-09 | 2.13E-11 | -0.26779 | 0.631513 | 0.8993   |
| FXD2          | 0.000311 | 0.000575 | 3.52E-08 | 0.436876 | -0.6634  | -1.10028 |
| FXD5          | 2.43E-07 | 7.10E-06 | 3.91E-11 | 0.39639  | -0.37776 | -0.77415 |
| FXD6-<br>FXD2 | 4.75E-05 | 0.00018  | 1.85E-08 | 0.655559 | -0.91809 | -1.57365 |
| FYB           | 0.000107 | 0.004364 | 2.42E-09 | 0.350377 | -0.36856 | -0.71893 |
| FZD6          | 0.003354 | 0.000635 | 4.49E-08 | 0.402222 | -0.58554 | -0.98776 |
| FZD7          | 9.58E-07 | 0.000858 | 4.97E-11 | 0.542185 | -0.52534 | -1.06753 |
| G6PC          | 0.123413 | 0.000947 | 1.82E-05 | -0.28286 | 0.756655 | 1.039518 |
| GABBR1        | 2.41E-08 | 4.53E-08 | 1.57E-11 | 0.617381 | -0.53988 | -1.15726 |
| GABRE         | 0.004031 | 0.00297  | 2.98E-07 | 0.462644 | -0.56832 | -1.03096 |
| GABRP         | 0.265482 | 0.027147 | 0.000248 | 0.194299 | -0.63381 | -0.82811 |
| GALK1         | 0.007896 | 0.001095 | 1.36E-08 | -0.23287 | 0.318233 | 0.551104 |
| GALNT7        | 1.93E-08 | 4.91E-08 | 2.68E-11 | 0.401609 | -0.48382 | -0.88543 |
| GAPT          | 5.23E-05 | 0.001737 | 3.45E-09 | 0.233066 | -0.37302 | -0.60609 |
| GAS2          | 0.538916 | 7.36E-09 | 1.44E-06 | 0.107029 | 0.505431 | 0.398401 |
| GAS2L3        | 3.97E-07 | 1.48E-08 | 1.57E-11 | 0.430331 | -0.64515 | -1.07549 |
| GBA3          | 0.025667 | 3.07E-06 | 2.81E-09 | -0.16339 | 0.546549 | 0.709943 |
| GBAS          | 9.91E-06 | 3.98E-05 | 2.79E-10 | 0.345818 | -0.27328 | -0.61909 |
| GBP1          | 0.00012  | 0.000171 | 3.23E-10 | 0.467609 | -0.68484 | -1.15245 |
| GBP2          | 7.94E-05 | 0.001517 | 7.70E-10 | 0.458092 | -0.4223  | -0.8804  |
| GBP3          | 0.000383 | 1.13E-05 | 3.40E-10 | 0.699574 | -0.73165 | -1.43122 |
| GBP4          | 0.000434 | 0.010538 | 1.58E-08 | 0.299664 | -0.33958 | -0.63925 |
| GBP5          | 2.23E-06 | 1.29E-05 | 3.59E-11 | 0.653411 | -0.85942 | -1.51283 |
| GCA           | 3.69E-06 | 1.97E-08 | 1.70E-11 | 0.412645 | -0.52425 | -0.9369  |
| GCAT          | 0.005041 | 1.08E-07 | 1.64E-10 | -0.2037  | 0.411057 | 0.614759 |
| GCDH          | 0.019458 | 6.09E-05 | 7.70E-10 | -0.22271 | 0.43908  | 0.661788 |
| GCHFR         | 0.008665 | 4.49E-05 | 3.03E-08 | -0.17667 | 0.354198 | 0.530873 |
| GCK           | 0.76493  | 0.000121 | 0.000599 | -0.11519 | 1.029606 | 1.144793 |
| GCKR          | 0.001925 | 2.41E-12 | 2.68E-11 | -0.20354 | 0.5933   | 0.796837 |
| GDF15         | 0.006506 | 4.06E-06 | 2.79E-10 | 0.211339 | -0.42688 | -0.63822 |
| GEM           | 1.94E-06 | 1.60E-06 | 2.68E-11 | 0.813498 | -1.00371 | -1.81721 |
| GFRA1         | 0.924381 | 1.97E-08 | 2.89E-08 | 0.001315 | 0.510703 | 0.509389 |
| GGACT         | 0.003147 | 3.53E-05 | 4.91E-09 | -0.20633 | 0.306324 | 0.512657 |
| GGTA1P        | 4.29E-07 | 0.008079 | 7.01E-09 | 0.42422  | -0.3224  | -0.74662 |

|             |          |          |          |          |          |          |
|-------------|----------|----------|----------|----------|----------|----------|
| GIMAP2      | 6.50E-07 | 0.003681 | 9.01E-10 | 0.49443  | -0.2725  | -0.76693 |
| GIMAP4      | 1.17E-05 | 4.70E-06 | 2.49E-11 | 0.359137 | -0.43998 | -0.79912 |
| GIMAP6      | 2.74E-06 | 0.000447 | 3.40E-10 | 0.362638 | -0.29547 | -0.65811 |
| GIMAP7      | 0.000762 | 0.000115 | 4.91E-09 | 0.365511 | -0.42603 | -0.79154 |
| GINS1       | 2.14E-05 | 1.40E-09 | 1.57E-11 | 0.585458 | -1.21422 | -1.79968 |
| GINS3       | 0.017581 | 3.66E-07 | 4.91E-10 | 0.157252 | -0.48654 | -0.64379 |
| GJA1        | 1.56E-05 | 0.0009   | 9.01E-10 | 0.705782 | -0.46716 | -1.17294 |
| GK          | 0.121853 | 0.012232 | 0.000293 | 0.195747 | -0.31061 | -0.50636 |
| GK3P        | 0.271157 | 0.000667 | 1.39E-05 | 0.139128 | -0.4643  | -0.60343 |
| GLA         | 1.38E-07 | 5.00E-09 | 1.85E-11 | 0.326052 | -0.46552 | -0.79157 |
| GLIPR1      | 2.50E-09 | 5.47E-10 | 1.57E-11 | 0.434653 | -0.49652 | -0.93118 |
| GLIPR2      | 6.77E-09 | 5.36E-08 | 1.72E-11 | 0.388434 | -0.52873 | -0.91716 |
| GLIS2       | 0.005041 | 0.034048 | 6.99E-06 | 0.378099 | -0.36311 | -0.74121 |
| GLIS3       | 0.000797 | 0.001666 | 6.68E-10 | 0.324568 | -0.46331 | -0.78788 |
| GLS2        | 0.000838 | 0.000211 | 1.02E-07 | -0.24289 | 0.28681  | 0.529698 |
| GLT8D2      | 0.004939 | 0.014722 | 1.06E-06 | 0.218281 | -0.29542 | -0.5137  |
| GLYAT       | 0.000797 | 9.20E-10 | 3.21E-11 | -0.17718 | 0.604503 | 0.781681 |
| GLYCTK      | 0.002392 | 2.89E-07 | 7.28E-11 | -0.20558 | 0.40184  | 0.607416 |
| GMFB        | 0.000376 | 1.48E-06 | 4.42E-10 | 0.269935 | -0.32931 | -0.59925 |
| GMFG        | 8.67E-06 | 6.47E-07 | 7.28E-11 | 0.283663 | -0.47648 | -0.76014 |
| GMNN        | 0.005564 | 2.34E-11 | 1.70E-11 | 0.153846 | -0.47659 | -0.63043 |
| GMPR        | 0.003636 | 0.000947 | 6.56E-08 | 0.237602 | -0.28717 | -0.52477 |
| GNE         | 0.007464 | 4.91E-10 | 4.19E-10 | -0.12124 | 0.716694 | 0.83793  |
| GNMT        | 6.84E-05 | 2.39E-09 | 1.60E-11 | -0.56591 | 1.348963 | 1.914878 |
| GNPDA1      | 0.000295 | 6.09E-05 | 3.97E-10 | 0.241341 | -0.2813  | -0.52264 |
| GNPDA2      | 0.000208 | 9.17E-05 | 8.13E-10 | 0.286666 | -0.29049 | -0.57715 |
| GNS         | 7.47E-07 | 7.57E-06 | 4.72E-11 | 0.287291 | -0.29941 | -0.5867  |
| GOLM1       | 3.82E-05 | 3.99E-07 | 8.29E-11 | 0.38681  | -0.51333 | -0.90014 |
| GOLT1B      | 0.002107 | 4.53E-08 | 1.64E-10 | 0.202802 | -0.38584 | -0.58864 |
| GORAB       | 4.58E-06 | 0.002595 | 2.18E-09 | 0.481791 | -0.27759 | -0.75938 |
| GPAM        | 0.353827 | 0.00159  | 3.37E-05 | -0.08569 | 0.432597 | 0.518284 |
| GPC3        | 0.024383 | 1.38E-06 | 1.96E-09 | 0.332435 | -1.16776 | -1.50019 |
| GPC4        | 0.069979 | 0.000171 | 9.30E-07 | 0.116028 | -0.52362 | -0.63965 |
| GPCPD1      | 1.46E-05 | 7.57E-06 | 2.43E-10 | 0.280669 | -0.33216 | -0.61283 |
| GPRI1       | 0.304323 | 4.91E-08 | 5.72E-10 | -0.08796 | 0.592699 | 0.680655 |
| GPNMB       | 1.05E-08 | 3.99E-07 | 2.43E-11 | 0.884681 | -1.07178 | -1.95646 |
| GPR124      | 6.90E-07 | 0.001517 | 4.23E-09 | 0.369331 | -0.3838  | -0.75313 |
| GPR125      | 0.001758 | 6.70E-10 | 8.66E-11 | -0.2562  | 0.585778 | 0.841983 |
| GPR137B     | 0.000159 | 9.17E-05 | 6.02E-09 | 0.386349 | -0.4097  | -0.79605 |
| GPR137C     | 0.029978 | 9.89E-06 | 2.36E-08 | 0.14263  | -0.41461 | -0.55724 |
| GPR160      | 1.11E-06 | 2.39E-09 | 1.82E-11 | 0.460972 | -0.71973 | -1.1807  |
| GPR171      | 9.27E-07 | 7.85E-05 | 1.06E-10 | 0.588407 | -0.66645 | -1.25486 |
| GPR18       | 2.56E-09 | 2.15E-06 | 2.58E-11 | 0.796061 | -0.75298 | -1.54904 |
| GPR34       | 9.58E-07 | 1.73E-06 | 4.51E-11 | 0.57575  | -0.58183 | -1.15758 |
| GPR56       | 0.014508 | 6.97E-07 | 1.29E-09 | 0.139713 | -0.41304 | -0.55275 |
| GPR65       | 2.02E-08 | 1.48E-06 | 2.49E-11 | 0.639771 | -0.60481 | -1.24458 |
| GPR82       | 0.000547 | 0.332437 | 6.11E-05 | 0.357236 | -0.16982 | -0.52706 |
| GPR88       | 0.092936 | 0.09585  | 0.000176 | -0.53652 | 0.705296 | 1.241814 |
| GPRC5B      | 7.51E-05 | 1.30E-10 | 1.69E-11 | 0.150762 | -0.3804  | -0.53116 |
| GPRIN3      | 4.11E-07 | 3.07E-06 | 2.38E-11 | 0.283248 | -0.33536 | -0.61861 |
| GPX2        | 0.001643 | 0.000223 | 1.11E-09 | 0.590699 | -0.66169 | -1.25238 |
| GPX3        | 0.05777  | 5.79E-06 | 3.18E-08 | 0.161934 | -0.47093 | -0.63286 |
| GPX7        | 0.202778 | 7.48E-07 | 3.95E-07 | 0.123627 | -0.78508 | -0.9087  |
| GPX8        | 0.003492 | 4.91E-08 | 3.48E-11 | 0.217668 | -0.76426 | -0.98193 |
| GRAMD1<br>B | 0.003011 | 2.87E-06 | 6.34E-10 | 0.201682 | -0.48787 | -0.68955 |
| GRAMD1<br>C | 0.273879 | 3.39E-07 | 1.94E-08 | -0.09126 | 0.576929 | 0.668192 |

|          |          |          |          |          |          |          |
|----------|----------|----------|----------|----------|----------|----------|
| GRAMD3   | 0.582881 | 1.16E-07 | 5.68E-07 | 0.047768 | 0.692532 | 0.644763 |
| GRB14    | 0.052793 | 2.91E-09 | 5.72E-10 | -0.11067 | 0.459983 | 0.570653 |
| GREM1    | 0.875177 | 2.29E-05 | 8.46E-05 | 0.036576 | 1.099356 | 1.062779 |
| GREM2    | 0.600397 | 0.001517 | 0.000159 | -0.07713 | 0.509462 | 0.586595 |
| GRHL2    | 0.025223 | 0.001453 | 3.60E-07 | 0.210491 | -0.42801 | -0.6385  |
| GRN      | 5.09E-06 | 3.98E-05 | 7.70E-10 | 0.313059 | -0.39421 | -0.70726 |
| GRTP1    | 0.018194 | 3.53E-06 | 3.11E-09 | -0.17093 | 0.404766 | 0.5757   |
| GSDMB    | 0.184388 | 1.78E-08 | 1.06E-08 | -0.09389 | 0.446719 | 0.540608 |
| GSKIP    | 0.001267 | 4.22E-05 | 1.96E-09 | 0.256609 | -0.33799 | -0.5946  |
| GSTP1    | 9.61E-06 | 4.53E-08 | 3.07E-11 | 0.319013 | -0.59273 | -0.91174 |
| GUCY1A3  | 3.14E-06 | 0.013186 | 1.43E-08 | 0.338164 | -0.19611 | -0.53427 |
| GYG1     | 3.04E-08 | 1.40E-09 | 2.78E-11 | 0.378322 | -0.50738 | -0.8857  |
| GYPC     | 3.17E-05 | 7.10E-06 | 4.19E-10 | 0.211919 | -0.31359 | -0.52551 |
| GYS2     | 0.080737 | 9.09E-09 | 9.05E-09 | -0.06561 | 0.466473 | 0.53208  |
| GZMA     | 8.43E-08 | 1.33E-08 | 1.70E-11 | 0.775603 | -0.94287 | -1.71848 |
| GZMB     | 0.000232 | 0.000947 | 1.17E-07 | 0.409183 | -0.54328 | -0.95246 |
| GZMH     | 0.004844 | 0.00052  | 1.41E-07 | 0.376226 | -0.51044 | -0.88666 |
| GZMK     | 8.05E-09 | 1.02E-06 | 1.82E-11 | 0.897091 | -0.79302 | -1.69011 |
| H19      | 0.006643 | 0.065616 | 2.58E-05 | 0.698016 | -0.46567 | -1.16368 |
| H2AFY2   | 0.029467 | 3.99E-07 | 1.68E-09 | 0.188045 | -0.56221 | -0.75026 |
| H2AFZ    | 1.07E-06 | 6.37E-08 | 2.58E-11 | 0.276872 | -0.4529  | -0.72977 |
| HAAO     | 0.008205 | 2.48E-10 | 2.13E-11 | -0.24271 | 0.659336 | 0.902049 |
| HAGH     | 3.17E-05 | 4.52E-09 | 2.38E-11 | -0.21366 | 0.402407 | 0.616063 |
| HAO2     | 0.006779 | 2.89E-07 | 1.17E-09 | -0.18315 | 0.784249 | 0.967397 |
| HAPLN4   | 0.033731 | 7.36E-09 | 2.08E-10 | -0.26401 | 0.887803 | 1.151809 |
| HAUS3    | 0.000281 | 0.037344 | 1.17E-07 | 0.324808 | -0.20326 | -0.52807 |
| HBA1     | 0.212411 | 0.119684 | 0.003152 | -0.32592 | 0.429645 | 0.75556  |
| HBA2     | 0.212411 | 0.119684 | 0.003152 | -0.32592 | 0.429645 | 0.75556  |
| HBB      | 0.135251 | 0.151445 | 0.002386 | -0.27932 | 0.300807 | 0.580126 |
| HCAR3    | 0.138825 | 0.046278 | 0.000231 | 0.221532 | -0.38287 | -0.6044  |
| HCK      | 7.49E-09 | 0.001151 | 1.34E-10 | 0.563887 | -0.41779 | -0.98168 |
| HCLS1    | 1.50E-07 | 6.37E-08 | 1.68E-11 | 0.450724 | -0.52208 | -0.9728  |
| HCP5     | 1.25E-05 | 9.47E-07 | 1.82E-11 | 0.588293 | -0.79358 | -1.38188 |
| HCST     | 2.85E-06 | 4.67E-07 | 7.58E-11 | 0.382413 | -0.56912 | -0.95153 |
| HDHD3    | 0.257061 | 3.12E-08 | 1.17E-09 | -0.07227 | 0.449949 | 0.522217 |
| HEG1     | 7.27E-06 | 4.31E-07 | 1.06E-10 | 0.292755 | -0.34407 | -0.63682 |
| HELLS    | 1.04E-06 | 1.10E-06 | 2.38E-11 | 0.311577 | -0.44314 | -0.75472 |
| HENMT1   | 2.35E-05 | 8.76E-12 | 1.68E-11 | 0.240562 | -0.55379 | -0.79436 |
| HEPACAM  | 0.307401 | 9.17E-05 | 0.003715 | 0.262703 | 0.716363 | 0.45366  |
| HEPH     | 5.87E-05 | 5.73E-05 | 1.41E-10 | 0.262725 | -0.36027 | -0.62299 |
| HEPN1    | 0.307401 | 9.17E-05 | 0.003715 | 0.262703 | 0.716363 | 0.45366  |
| HES4     | 0.087816 | 2.00E-06 | 5.43E-09 | 0.13449  | -0.49261 | -0.6271  |
| HGF      | 5.60E-07 | 2.31E-06 | 2.68E-11 | 0.311185 | -0.39787 | -0.70905 |
| HGFAC    | 0.702732 | 4.02E-09 | 9.05E-09 | -0.02204 | 0.598196 | 0.62024  |
| HIF1A    | 2.66E-06 | 5.51E-07 | 1.68E-11 | 0.336177 | -0.37199 | -0.70816 |
| HJURP    | 0.97743  | 9.89E-06 | 1.05E-05 | -0.02108 | -0.51042 | -0.48934 |
| HK1      | 1.10E-09 | 1.95E-09 | 1.57E-11 | 0.410057 | -0.47146 | -0.88152 |
| HK3      | 0.000612 | 0.008079 | 6.56E-08 | 0.237756 | -0.2873  | -0.52506 |
| HKDC1    | 0.006001 | 2.46E-07 | 9.63E-11 | 0.287952 | -0.7151  | -1.00305 |
| HLA-A    | 1.14E-07 | 1.29E-05 | 7.95E-11 | 0.413285 | -0.32595 | -0.73924 |
| HLA-B    | 8.40E-06 | 1.47E-05 | 9.12E-11 | 0.421983 | -0.49484 | -0.91682 |
| HLA-C    | 4.44E-06 | 3.53E-05 | 2.79E-10 | 0.294871 | -0.31903 | -0.6139  |
| HLA-DMA  | 1.22E-09 | 1.98E-10 | 1.57E-11 | 0.745796 | -0.93316 | -1.67896 |
| HLA-DPA1 | 2.24E-08 | 6.11E-07 | 1.57E-11 | 0.560593 | -0.71938 | -1.27997 |
| HLA-DPA1 | 6.94E-08 | 0.003104 | 6.94E-11 | 0.792344 | -0.45786 | -1.2502  |

|           |          |          |          |          |          |          |
|-----------|----------|----------|----------|----------|----------|----------|
| HLA-DPB1  | 4.03E-09 | 2.46E-07 | 1.57E-11 | 0.470853 | -0.47717 | -0.94803 |
| HLA-DPB2  | 0.11564  | 0.000495 | 1.11E-06 | 0.192137 | -0.61111 | -0.80325 |
| HLA-DQA1  | 0.017581 | 0.067549 | 0.000112 | 0.56419  | -0.66826 | -1.23245 |
| HLA-DQA2  | 1.42E-05 | 9.27E-06 | 1.56E-10 | 0.827782 | -0.89169 | -1.71947 |
| HLA-DQB1  | 2.80E-05 | 0.00018  | 2.66E-10 | 0.556063 | -0.65103 | -1.20709 |
| HLA-DRA   | 3.32E-08 | 1.08E-08 | 1.57E-11 | 0.625934 | -0.76401 | -1.38995 |
| HLA-DRB1  | 1.10E-07 | 3.53E-05 | 1.69E-11 | 0.534346 | -0.53703 | -1.07137 |
| HLA-DRB3  | 0.001137 | 0.165727 | 8.57E-06 | 0.498182 | -0.39312 | -0.89131 |
| HLA-DRB4  | 8.95E-07 | 0.001901 | 2.92E-10 | 0.450656 | -0.36672 | -0.81738 |
| HLA-DRB5  | 0.001603 | 0.184945 | 2.05E-05 | 0.46492  | -0.38304 | -0.84796 |
| HLA-DRB6  | 0.033731 | 0.209631 | 0.000164 | 0.267753 | -0.24199 | -0.50974 |
| HLA-E     | 0.000151 | 0.000308 | 4.91E-10 | 0.278646 | -0.33603 | -0.61468 |
| HLA-F     | 1.28E-07 | 4.70E-06 | 1.58E-11 | 0.537986 | -0.54873 | -1.08672 |
| HLA-G     | 1.67E-05 | 1.90E-05 | 3.97E-10 | 0.308915 | -0.38429 | -0.69321 |
| HLA-J     | 0.001267 | 0.000103 | 7.01E-09 | 0.252608 | -0.42085 | -0.67345 |
| HLX       | 0.941979 | 2.39E-09 | 3.58E-10 | -0.04337 | 0.49018  | 0.533554 |
| HMCN1     | 0.000778 | 0.0022   | 3.56E-09 | 0.42625  | -0.51092 | -0.93717 |
| HMGB2     | 0.072174 | 4.16E-08 | 3.78E-10 | 0.113303 | -0.39685 | -0.51015 |
| HMGCS2    | 0.005464 | 6.70E-10 | 3.91E-11 | -0.18065 | 0.605783 | 0.786432 |
| HMGN1     | 3.71E-05 | 1.05E-12 | 1.64E-11 | 0.160978 | -0.47425 | -0.63522 |
| HMGN4     | 9.96E-10 | 4.98E-11 | 1.57E-11 | 0.509884 | -0.47059 | -0.98048 |
| HMMR      | 0.000226 | 3.98E-05 | 1.06E-10 | 0.485445 | -0.87195 | -1.3574  |
| HMOX1     | 0.118714 | 3.12E-05 | 1.21E-06 | 0.154601 | -0.41277 | -0.56737 |
| HN1       | 0.000412 | 2.16E-11 | 1.57E-11 | 0.222733 | -0.54408 | -0.76682 |
| HNF4A-AS1 | 0.947053 | 1.20E-08 | 4.97E-07 | 0.044605 | 0.707531 | 0.662926 |
| HOGA1     | 0.095582 | 4.67E-07 | 4.91E-09 | -0.1178  | 0.445114 | 0.562913 |
| HOMER2    | 0.081872 | 5.44E-09 | 2.92E-10 | -0.13639 | 0.605504 | 0.741891 |
| HOTS      | 0.004466 | 0.088602 | 9.43E-05 | 0.377389 | -0.22626 | -0.60365 |
| HPN       | 0.003011 | 1.01E-09 | 3.21E-11 | -0.14955 | 0.35162  | 0.501169 |
| HPR       | 0.002153 | 3.17E-10 | 2.38E-11 | -0.16035 | 0.603542 | 0.76389  |
| HPS5      | 0.10091  | 0.000547 | 4.44E-06 | 0.156205 | -0.38037 | -0.53658 |
| HPSE      | 8.61E-09 | 1.26E-07 | 1.57E-11 | 0.541269 | -0.58705 | -1.12832 |
| HRCT1     | 0.031057 | 0.003836 | 6.79E-07 | 0.200279 | -0.31402 | -0.5143  |
| HS3ST2    | 0.149521 | 0.023849 | 3.63E-05 | 0.199956 | -0.38405 | -0.584   |
| HSBP1L1   | 0.000658 | 9.09E-09 | 2.58E-11 | -0.21562 | 0.429684 | 0.6453   |
| HSD11B1   | 0.004844 | 1.62E-07 | 3.48E-11 | -0.14599 | 0.419983 | 0.565972 |
| HSD17B14  | 0.000214 | 8.17E-05 | 5.17E-09 | -0.51374 | 0.634368 | 1.148106 |
| HSPA2     | 2.65E-05 | 1.93E-07 | 3.59E-11 | 0.539348 | -1.01077 | -1.55012 |
| HSPA4L    | 0.005464 | 0.00018  | 2.05E-07 | 0.431188 | -0.49189 | -0.92308 |
| HSPA6     | 0.000838 | 0.000447 | 3.03E-08 | 0.231405 | -0.30606 | -0.53746 |
| HSPB9     | 0.040115 | 2.03E-05 | 1.85E-08 | -0.17582 | 0.523915 | 0.699737 |
| HSPBAP1   | 2.50E-05 | 0.000495 | 1.96E-09 | 0.332076 | -0.28188 | -0.61395 |
| HTR2B     | 0.003865 | 0.000308 | 1.76E-08 | 0.417606 | -0.50045 | -0.91805 |
| IAPP      | 0.448609 | 0.000161 | 6.44E-06 | -0.09478 | 0.425896 | 0.520674 |
| IARS      | 0.053563 | 1.37E-07 | 3.28E-09 | 0.111241 | -0.39465 | -0.50589 |
| ICAM1     | 1.73E-05 | 0.000815 | 1.78E-09 | 0.347713 | -0.38058 | -0.7283  |

|              |          |          |          |          |          |          |
|--------------|----------|----------|----------|----------|----------|----------|
| ICAM2        | 7.94E-05 | 6.97E-07 | 1.88E-10 | 0.217115 | -0.30216 | -0.51927 |
| ICOS         | 8.72E-05 | 3.98E-05 | 1.11E-09 | 0.260625 | -0.3499  | -0.61053 |
| ID1          | 0.560489 | 0.002481 | 5.89E-05 | 0.15515  | -0.57479 | -0.72994 |
| ID3          | 0.000838 | 5.44E-09 | 9.63E-11 | 0.220823 | -0.6344  | -0.85523 |
| ID4          | 0.016925 | 7.10E-06 | 3.45E-09 | 0.243793 | -0.66332 | -0.90711 |
| IDO1         | 0.001162 | 0.000189 | 3.84E-09 | 0.366758 | -0.51092 | -0.87768 |
| IER3         | 0.037193 | 4.91E-10 | 7.95E-11 | 0.167153 | -0.96309 | -1.13025 |
| IER5         | 3.61E-09 | 5.79E-06 | 1.64E-11 | 0.661535 | -0.36378 | -1.02531 |
| IER5L        | 0.000226 | 0.000121 | 4.91E-10 | 0.256738 | -0.2948  | -0.55154 |
| IFI16        | 8.17E-08 | 3.78E-08 | 2.87E-11 | 0.590505 | -0.67494 | -1.26544 |
| IFI27        | 0.001359 | 0.026336 | 4.97E-07 | 0.551089 | -0.59032 | -1.14141 |
| IFI30        | 1.87E-08 | 5.44E-09 | 1.57E-11 | 0.559829 | -0.81134 | -1.37117 |
| IFI35        | 0.014018 | 2.58E-05 | 3.68E-08 | 0.174555 | -0.45001 | -0.62457 |
| IFI44        | 7.02E-06 | 0.409436 | 2.36E-07 | 0.649814 | -0.25064 | -0.90045 |
| IFI44L       | 0.000124 | 0.583565 | 1.62E-05 | 0.680225 | -0.27161 | -0.95183 |
| IFI6         | 0.011462 | 0.055229 | 8.90E-07 | 0.60668  | -0.63853 | -1.24521 |
| IFIT3        | 4.06E-05 | 0.001453 | 1.29E-09 | 0.380768 | -0.4994  | -0.88017 |
| IFIT5        | 7.54E-06 | 0.004751 | 2.30E-09 | 0.32845  | -0.27023 | -0.59868 |
| IFITM1       | 0.002153 | 0.056842 | 9.30E-07 | 0.319966 | -0.24819 | -0.56815 |
| IFNG         | 0.00465  | 8.67E-05 | 5.43E-09 | 0.284575 | -0.68415 | -0.96873 |
| IFNGR1       | 3.07E-05 | 2.43E-05 | 6.59E-11 | 0.256756 | -0.3041  | -0.56085 |
| IFNGR2       | 1.42E-05 | 5.47E-10 | 1.57E-11 | 0.208841 | -0.36575 | -0.57459 |
| IGFALS       | 0.24863  | 9.89E-06 | 1.28E-07 | -0.15751 | 0.619659 | 0.777168 |
| IGFBP6       | 0.000857 | 0.006623 | 3.03E-08 | 0.357294 | -0.31416 | -0.67146 |
| IGFBP7       | 9.22E-05 | 1.40E-09 | 1.70E-11 | 0.290122 | -0.65053 | -0.94065 |
| IGH          | 2.65E-05 | 0.004183 | 4.07E-08 | 0.242501 | -0.31791 | -0.56041 |
| IGHA1        | 0.000101 | 0.006897 | 6.26E-08 | 0.216569 | -0.28607 | -0.50264 |
| IGHA2        | 5.46E-06 | 0.002273 | 1.11E-08 | 0.324017 | -0.39763 | -0.72165 |
| IGHD         | 0.00069  | 0.0009   | 3.03E-08 | 0.189311 | -0.31768 | -0.50699 |
| IGHG2        | 5.15E-08 | 0.000447 | 1.15E-10 | 0.569645 | -0.41537 | -0.98502 |
| IGHG3        | 7.05E-05 | 0.008079 | 1.23E-07 | 0.283238 | -0.32869 | -0.61193 |
| IGHG4        | 9.22E-05 | 0.000605 | 1.36E-08 | 0.247711 | -0.39442 | -0.64213 |
| IGHM         | 4.58E-06 | 0.002077 | 2.68E-09 | 0.26672  | -0.3178  | -0.58452 |
| IGHV3-23     | 2.35E-05 | 0.012232 | 1.23E-07 | 0.407528 | -0.43407 | -0.84159 |
| IGHV4-31     | 8.67E-06 | 0.003236 | 4.45E-09 | 0.291857 | -0.32986 | -0.62171 |
| IGJ          | 1.55E-06 | 0.001151 | 2.79E-10 | 0.931708 | -0.7639  | -1.6956  |
| IGK          | 4.18E-09 | 6.85E-05 | 2.68E-11 | 0.834031 | -0.67498 | -1.50901 |
| IGKC         | 3.65E-09 | 6.09E-05 | 3.07E-11 | 0.764039 | -0.63548 | -1.39952 |
| IGKV1-17     | 5.37E-09 | 0.004364 | 1.27E-10 | 1.368606 | -0.84679 | -2.21539 |
| IGKV1-37     | 1.03E-08 | 0.000381 | 1.06E-10 | 0.945364 | -0.87719 | -1.82256 |
| IGKV1D-37    | 1.03E-08 | 0.000381 | 1.06E-10 | 0.945364 | -0.87719 | -1.82256 |
| IGKV1OR-1    | 6.03E-07 | 0.000575 | 5.45E-10 | 0.599582 | -0.64625 | -1.24583 |
| IGKV1OR10-1  | 6.03E-07 | 0.000575 | 5.45E-10 | 0.599582 | -0.64625 | -1.24583 |
| IGKV1OR2-108 | 4.03E-09 | 0.00159  | 4.97E-11 | 1.092432 | -0.80425 | -1.89668 |
| IGKV1OR2-2   | 6.03E-07 | 0.000575 | 5.45E-10 | 0.599582 | -0.64625 | -1.24583 |
| IGKV2-28     | 9.18E-09 | 0.000171 | 1.10E-10 | 1.107039 | -0.92634 | -2.03337 |
| IGKV2D-28    | 9.18E-09 | 0.000171 | 1.10E-10 | 1.107039 | -0.92634 | -2.03337 |
| IGKV4-1      | 1.79E-08 | 9.69E-05 | 5.17E-11 | 0.929474 | -0.96489 | -1.89437 |
| IGLC1        | 1.93E-08 | 2.58E-05 | 1.10E-10 | 0.469505 | -0.5428  | -1.0123  |
| IGLJ2        | 8.41E-09 | 3.53E-05 | 2.66E-10 | 0.659502 | -0.78265 | -1.44215 |
| IGLJ3        | 5.72E-09 | 4.77E-05 | 1.72E-10 | 0.611154 | -0.74689 | -1.35805 |
| IGLL3P       | 8.73E-09 | 3.29E-06 | 2.87E-11 | 0.965612 | -0.87468 | -1.8403  |

|               |          |          |          |          |          |          |
|---------------|----------|----------|----------|----------|----------|----------|
| IGLL5         | 2.48E-06 | 6.20E-06 | 1.34E-10 | 0.613293 | -0.95223 | -1.56553 |
| IGLV@         | 1.25E-08 | 5.73E-05 | 2.43E-10 | 0.611611 | -0.74217 | -1.35378 |
| IGLV1-36      | 5.51E-09 | 2.03E-05 | 1.21E-10 | 1.185568 | -1.1474  | -2.33297 |
| IGLV1-40      | 0.001925 | 0.000144 | 3.03E-08 | 0.226307 | -0.61138 | -0.83769 |
| IGLV1-44      | 8.73E-09 | 3.53E-05 | 1.06E-10 | 0.567725 | -0.62124 | -1.18896 |
| IGLV1-50      | 1.25E-08 | 6.09E-05 | 1.72E-10 | 0.705937 | -0.87939 | -1.58533 |
| IGLV2-14      | 3.19E-07 | 0.000324 | 6.68E-10 | 0.670867 | -0.87395 | -1.54481 |
| IGLV3-1       | 0.000159 | 0.001151 | 1.29E-08 | 0.265376 | -0.40778 | -0.67316 |
| IGLV3-10      | 4.61E-05 | 0.002378 | 1.94E-08 | 0.50789  | -0.60432 | -1.11221 |
| IGLV3-19      | 9.13E-08 | 0.000815 | 6.01E-10 | 0.659203 | -0.76936 | -1.42856 |
| IGLV3-25      | 0.000274 | 0.002715 | 1.35E-07 | 0.318126 | -0.41563 | -0.73376 |
| IGLV9-49      | 0.940703 | 0.018797 | 0.002985 | 0.021518 | -0.48594 | -0.50745 |
| IGSF6         | 2.48E-06 | 3.07E-06 | 7.95E-11 | 0.546197 | -0.75768 | -1.30387 |
| IGSF9         | 0.037193 | 0.01754  | 5.94E-06 | -0.24838 | 0.345242 | 0.593621 |
| IKBIP         | 0.000208 | 5.00E-09 | 2.43E-11 | 0.257372 | -0.44251 | -0.69988 |
| IKZF3         | 0.000762 | 2.75E-05 | 2.81E-09 | 0.181767 | -0.33539 | -0.51716 |
| IL10RA        | 2.51E-07 | 8.67E-05 | 5.42E-11 | 0.45077  | -0.4212  | -0.87197 |
| IL15          | 1.68E-06 | 1.62E-07 | 4.51E-11 | 0.333574 | -0.52294 | -0.85652 |
| IL15RA        | 0.000944 | 1.26E-07 | 1.72E-10 | 0.171514 | -0.37339 | -0.5449  |
| IL18          | 9.96E-10 | 9.20E-10 | 1.57E-11 | 0.739487 | -0.89435 | -1.63384 |
| IL1B          | 0.000481 | 4.49E-05 | 1.36E-08 | 0.17059  | -0.39226 | -0.56285 |
| IL1RAP        | 0.188866 | 3.66E-07 | 6.26E-08 | -0.15784 | 0.911718 | 1.069559 |
| IL20RB        | 0.834423 | 0.090918 | 0.010929 | -0.10531 | 0.645535 | 0.750841 |
| IL21R         | 1.89E-05 | 2.15E-05 | 3.58E-10 | 0.207031 | -0.42618 | -0.63321 |
| IL2RB         | 0.00022  | 0.000324 | 2.36E-08 | 0.375369 | -0.41979 | -0.79516 |
| IL2RG         | 5.09E-06 | 8.17E-05 | 5.16E-10 | 0.315036 | -0.38715 | -0.70219 |
| IL32          | 1.77E-05 | 1.29E-05 | 3.07E-11 | 0.861911 | -0.83471 | -1.69662 |
| IL6R          | 0.083071 | 1.26E-09 | 1.06E-09 | -0.15388 | 0.603148 | 0.757031 |
| IL7           | 0.000533 | 2.00E-06 | 9.12E-11 | 0.329228 | -0.47951 | -0.80874 |
| IL7R          | 3.25E-06 | 0.00018  | 1.10E-10 | 0.536929 | -0.54271 | -1.07964 |
| INMT          | 0.072174 | 2.15E-08 | 1.17E-09 | 0.097982 | -0.46608 | -0.56406 |
| INPP5F        | 2.43E-05 | 1.73E-06 | 6.59E-11 | 0.223948 | -0.30312 | -0.52707 |
| IPCEF1        | 2.01E-05 | 0.000121 | 1.36E-09 | 0.325954 | -0.33385 | -0.6598  |
| IQGAP1        | 0.00011  | 0.000153 | 1.06E-09 | 0.371772 | -0.43333 | -0.8051  |
| IRF1          | 1.89E-05 | 2.15E-05 | 2.43E-11 | 0.467197 | -0.59298 | -1.06018 |
| IRF8          | 5.60E-07 | 2.87E-06 | 8.29E-11 | 0.41711  | -0.45483 | -0.87194 |
| IRS1          | 0.560489 | 4.53E-08 | 4.95E-08 | 0.038828 | 0.631888 | 0.59306  |
| IRS2          | 0.399809 | 0.025499 | 0.002675 | -0.15135 | 0.382371 | 0.533726 |
| ISG15         | 0.000238 | 0.000263 | 4.03E-09 | 0.470453 | -0.72413 | -1.19458 |
| ISG20         | 4.11E-08 | 8.21E-11 | 1.57E-11 | 0.592897 | -1.18013 | -1.77303 |
| ISLR          | 0.002668 | 0.004364 | 5.20E-08 | 0.246465 | -0.34393 | -0.59039 |
| ITGA2         | 0.044064 | 5.39E-05 | 7.79E-09 | 0.123793 | -0.38681 | -0.5106  |
| ITGA4         | 9.13E-08 | 6.45E-05 | 1.06E-10 | 0.487472 | -0.45745 | -0.94492 |
| ITGA6         | 0.012087 | 0.000109 | 1.11E-08 | 0.202832 | -0.32476 | -0.52759 |
| ITGAL         | 4.11E-07 | 0.000858 | 1.79E-10 | 0.461832 | -0.38026 | -0.84209 |
| ITGAM         | 5.02E-07 | 0.000737 | 3.07E-10 | 0.580326 | -0.39565 | -0.97598 |
| ITGAV         | 6.41E-08 | 7.59E-08 | 1.77E-11 | 0.524946 | -0.61524 | -1.14019 |
| ITGB2         | 3.83E-07 | 0.0002   | 1.15E-10 | 0.392624 | -0.37356 | -0.76618 |
| ITGB2-<br>AS1 | 0.001215 | 0.005625 | 9.52E-10 | 0.274451 | -0.27494 | -0.54939 |
| ITGB3BP       | 0.007896 | 5.39E-06 | 7.22E-08 | 0.294194 | -0.56017 | -0.85436 |
| ITGBL1        | 8.72E-05 | 5.07E-05 | 7.58E-11 | 0.380713 | -0.59731 | -0.97802 |
| ITIH1         | 0.006001 | 2.51E-11 | 5.17E-11 | -0.11964 | 0.509522 | 0.629163 |
| ITIH5         | 0.000173 | 0.025499 | 2.25E-07 | 0.320784 | -0.22008 | -0.54087 |
| ITK           | 3.58E-09 | 7.59E-08 | 1.68E-11 | 0.830897 | -0.88102 | -1.71192 |
| ITLN1         | 0.000311 | 0.935938 | 0.00045  | 0.675283 | 0.054694 | -0.62059 |
| ITM2A         | 5.87E-09 | 6.74E-09 | 1.57E-11 | 0.905734 | -0.86545 | -1.77118 |
| JAG1          | 3.39E-05 | 1.38E-06 | 2.43E-10 | 0.263735 | -0.37647 | -0.64021 |

|          |          |          |          |          |          |          |
|----------|----------|----------|----------|----------|----------|----------|
| JAK2     | 2.23E-06 | 0.012702 | 5.43E-09 | 0.308451 | -0.1992  | -0.50765 |
| JAZF1    | 2.28E-05 | 0.866388 | 1.05E-05 | 0.557044 | -0.0688  | -0.62584 |
| JUN      | 0.009684 | 9.89E-06 | 1.23E-09 | 0.26387  | -0.47012 | -0.73399 |
| JUNB     | 0.005886 | 4.91E-08 | 3.78E-10 | 0.220092 | -0.53658 | -0.75667 |
| KAL1     | 0.024383 | 1.02E-06 | 7.28E-11 | 0.152965 | -0.37232 | -0.52528 |
| KANK4    | 0.202778 | 0.000121 | 8.52E-07 | -0.20182 | 0.718344 | 0.920168 |
| KBTBD11  | 0.012526 | 2.39E-09 | 2.96E-11 | -0.30954 | 1.141827 | 1.451369 |
| KBTBD8   | 0.000114 | 0.000992 | 7.00E-10 | 0.345171 | -0.35283 | -0.698   |
| KCNJ10   | 0.000295 | 0.0715   | 1.64E-06 | 0.320026 | -0.31441 | -0.63443 |
| KCNJ16   | 8.72E-05 | 0.003526 | 5.20E-08 | 0.415714 | -0.44187 | -0.85759 |
| KCNJ2    | 0.000329 | 0.034048 | 5.44E-08 | 0.447887 | -0.32173 | -0.76962 |
| KCNK5    | 0.254338 | 5.39E-05 | 1.58E-06 | -0.18645 | 0.727199 | 0.913647 |
| KCNN2    | 0.000944 | 2.16E-11 | 2.31E-11 | -0.41867 | 2.332371 | 2.75104  |
| KCNS3    | 0.360816 | 0.05377  | 0.002826 | 0.151387 | -0.36284 | -0.51423 |
| KCTD12   | 4.11E-08 | 9.89E-06 | 1.57E-11 | 0.769985 | -0.54835 | -1.31833 |
| KCTD9    | 2.28E-05 | 0.0007   | 5.45E-10 | 0.298603 | -0.22494 | -0.52355 |
| KDELR3   | 0.010441 | 1.16E-07 | 1.79E-10 | 0.249089 | -0.75504 | -1.00413 |
| KHK      | 0.005041 | 1.75E-09 | 3.21E-11 | -0.16567 | 0.523729 | 0.689397 |
| KIAA0101 | 6.10E-06 | 1.06E-05 | 8.66E-11 | 0.383951 | -0.56701 | -0.95096 |
| KIAA0226 | 4.87E-09 | 7.28E-05 | 1.85E-11 | 0.491706 | -0.39654 | -0.88825 |
| L        |          |          |          |          |          |          |
| KIAA1211 | 0.000742 | 0.000211 | 7.40E-09 | 0.196917 | -0.44056 | -0.63748 |
| KIAA1598 | 0.000367 | 4.22E-05 | 1.29E-08 | 0.250207 | -0.26939 | -0.5196  |
| KIAA1804 | 0.240437 | 0.002077 | 1.69E-05 | -0.11202 | 0.391386 | 0.503408 |
| KIF11    | 8.94E-05 | 4.70E-06 | 4.51E-11 | 0.370015 | -0.79586 | -1.16588 |
| KIF14    | 0.023988 | 3.53E-05 | 8.59E-10 | 0.191846 | -0.5316  | -0.72344 |
| KIF15    | 0.282675 | 2.43E-05 | 3.11E-07 | 0.083337 | -0.51887 | -0.60221 |
| KIF16B   | 0.008995 | 0.000815 | 7.22E-08 | 0.236388 | -0.30258 | -0.53897 |
| KIF18A   | 0.046617 | 1.47E-05 | 5.20E-08 | 0.103458 | -0.42342 | -0.52688 |
| KIF18B   | 0.015053 | 0.000109 | 4.45E-09 | 0.175694 | -0.3352  | -0.51089 |
| KIF20A   | 9.49E-05 | 8.71E-06 | 1.48E-10 | 0.576653 | -1.03078 | -1.60744 |
| KIF21B   | 1.56E-05 | 9.89E-08 | 3.59E-11 | 0.285531 | -0.38376 | -0.66929 |
| KIF2A    | 2.14E-06 | 3.53E-05 | 3.07E-11 | 0.309394 | -0.2911  | -0.60049 |
| KIF4A    | 3.71E-05 | 8.07E-07 | 1.06E-10 | 0.400469 | -0.71972 | -1.12019 |
| KIF5B    | 0.000208 | 1.47E-05 | 1.48E-10 | 0.225324 | -0.28613 | -0.51146 |
| KLB      | 0.951045 | 5.04E-06 | 8.57E-06 | 0.073214 | 0.590658 | 0.517444 |
| KLF6     | 0.000311 | 2.93E-05 | 4.19E-10 | 0.226139 | -0.30936 | -0.5355  |
| KLHL29   | 0.084247 | 3.78E-08 | 1.10E-10 | 0.105229 | -0.46751 | -0.57274 |
| KLHL6    | 2.50E-05 | 2.49E-06 | 3.91E-11 | 0.229621 | -0.38001 | -0.60963 |
| KLKB1    | 0.001925 | 5.72E-11 | 4.51E-11 | -0.16333 | 0.633664 | 0.796994 |
| KLRB1    | 0.000103 | 0.00746  | 2.36E-07 | 0.451544 | -0.36379 | -0.81534 |
| KLRC1    | 0.024383 | 0.402369 | 0.001462 | 0.301844 | -0.24568 | -0.54752 |
| KLRC2    | 0.024383 | 0.402369 | 0.001462 | 0.301844 | -0.24568 | -0.54752 |
| KLRC4-   |          |          |          |          |          |          |
| KLRK1    | 1.51E-05 | 2.87E-06 | 3.36E-11 | 0.472482 | -0.63224 | -1.10472 |
| KLRK1    | 1.51E-05 | 2.87E-06 | 3.36E-11 | 0.472482 | -0.63224 | -1.10472 |
| KNTC1    | 0.00012  | 6.66E-06 | 8.66E-11 | 0.276464 | -0.50257 | -0.77903 |
| KPNA2    | 5.46E-06 | 2.26E-10 | 1.57E-11 | 0.500269 | -0.8033  | -1.30357 |
| KRT18    | 0.001974 | 8.21E-11 | 1.70E-11 | 0.257593 | -0.70832 | -0.96592 |
| KRT19    | 0.016136 | 4.49E-05 | 1.06E-08 | 0.244152 | -0.54714 | -0.79129 |
| KRT222   | 0.022764 | 3.53E-05 | 4.03E-09 | 0.293147 | -0.61409 | -0.90723 |
| KRT23    | 0.005249 | 1.08E-08 | 3.21E-11 | 0.526989 | -2.92888 | -3.45587 |
| KRT8     | 0.000245 | 9.93E-09 | 1.10E-10 | 0.339665 | -0.6538  | -0.99346 |
| LAIR1    | 0.000142 | 1.02E-06 | 1.15E-10 | 0.212782 | -0.42546 | -0.63825 |
| LAIR2    | 0.114086 | 0.013678 | 2.49E-05 | 0.17788  | -0.47206 | -0.64994 |
| LAMA2    | 7.54E-06 | 1.29E-05 | 1.48E-10 | 0.23427  | -0.51234 | -0.74661 |
| LAMB1    | 0.003419 | 6.20E-06 | 3.63E-09 | 0.373887 | -0.64398 | -1.01787 |
| LAMP3    | 9.79E-08 | 4.22E-05 | 2.68E-11 | 0.921365 | -0.75535 | -1.67672 |

|              |          |          |          |          |          |          |
|--------------|----------|----------|----------|----------|----------|----------|
| LAPTM5       | 2.24E-08 | 5.44E-09 | 1.69E-11 | 0.527099 | -0.6685  | -1.1956  |
| LAX1         | 0.000281 | 0.000136 | 1.00E-09 | 0.274599 | -0.3713  | -0.6459  |
| LBH          | 4.03E-09 | 2.84E-08 | 1.57E-11 | 0.604243 | -0.64914 | -1.25338 |
| LCAT         | 0.006252 | 8.31E-10 | 3.59E-11 | -0.14581 | 0.433732 | 0.579547 |
| LCK          | 2.40E-09 | 3.39E-07 | 1.58E-11 | 0.701199 | -0.67611 | -1.37731 |
| LCN2         | 0.004844 | 3.74E-05 | 1.23E-09 | 0.26183  | -0.49335 | -0.75518 |
| LCP1         | 1.29E-05 | 3.98E-05 | 3.59E-11 | 0.340703 | -0.4893  | -0.83001 |
| LCP2         | 4.03E-09 | 2.15E-05 | 1.72E-11 | 0.351935 | -0.33727 | -0.68921 |
| LDHB         | 1.10E-07 | 5.47E-10 | 1.95E-11 | 0.32278  | -0.5551  | -0.87788 |
| LDHD         | 0.034876 | 1.61E-08 | 7.70E-10 | -0.10893 | 0.41595  | 0.524877 |
| LDLRAD3      | 0.031057 | 6.45E-05 | 3.68E-08 | 0.142118 | -0.36821 | -0.51033 |
| LDOC1        | 0.004844 | 0.0009   | 4.28E-08 | 0.280391 | -0.45347 | -0.73386 |
| LEPROTL1     | 2.31E-06 | 4.02E-09 | 1.95E-11 | 0.278893 | -0.37669 | -0.65558 |
| LGALS2       | 7.30E-05 | 0.007177 | 6.56E-08 | 0.452317 | -0.42513 | -0.87745 |
| LGALS3       | 2.94E-08 | 8.21E-11 | 1.57E-11 | 0.467847 | -0.67359 | -1.14144 |
| LGALS3B      | 0.003865 | 2.09E-07 | 1.43E-09 | 0.345164 | -0.62332 | -0.96848 |
| LGALS4       | 0.067013 | 0.000109 | 2.25E-07 | 0.458143 | -1.23892 | -1.69706 |
| LGALS9       | 0.000571 | 1.29E-05 | 1.96E-09 | 0.2875   | -0.42336 | -0.71086 |
| LGMN         | 0.000101 | 0.023849 | 2.05E-07 | 0.312686 | -0.25102 | -0.56371 |
| LGSN         | 0.604702 | 1.12E-09 | 8.62E-09 | -0.06031 | 1.254737 | 1.31505  |
| LHFP         | 0.000658 | 0.029892 | 3.02E-06 | 0.321342 | -0.27622 | -0.59756 |
| LHFPL2       | 1.21E-05 | 2.65E-09 | 2.21E-11 | 0.263803 | -0.51191 | -0.77572 |
| LIF          | 0.543405 | 2.89E-07 | 5.17E-09 | 0.057895 | -0.56156 | -0.61946 |
| LILRB1       | 0.000159 | 0.000103 | 1.36E-09 | 0.25958  | -0.44238 | -0.70196 |
| LILRB2       | 2.43E-07 | 9.69E-05 | 4.72E-11 | 0.447641 | -0.46353 | -0.91118 |
| LIMA1        | 0.000138 | 3.45E-08 | 4.72E-11 | 0.209698 | -0.37204 | -0.58174 |
| LIME1        | 0.020174 | 2.09E-07 | 1.72E-10 | -0.20279 | 0.584932 | 0.787725 |
| LINC00152    | 0.000585 | 2.51E-11 | 2.96E-11 | 0.171061 | -0.65668 | -0.82774 |
| LINC00844    | 0.029978 | 5.36E-08 | 6.34E-10 | -0.16671 | 0.807021 | 0.973735 |
| LINC00924    | 0.039514 | 0.193143 | 0.00392  | 0.242075 | -0.30762 | -0.5497  |
| LINC00939    | 0.044713 | 0.001151 | 3.68E-08 | -0.28073 | 0.436334 | 0.717061 |
| LINC01018    | 0.001391 | 1.78E-11 | 2.96E-11 | -0.32592 | 1.330447 | 1.656368 |
| LINC01093    | 0.01561  | 1.26E-09 | 5.42E-11 | -0.36875 | 1.451913 | 1.820665 |
| LINC01094    | 0.07627  | 5.07E-05 | 2.36E-08 | 0.139126 | -0.47721 | -0.61633 |
| LINC01127    | 0.780458 | 6.06E-09 | 2.59E-07 | -0.01011 | 0.849129 | 0.859243 |
| LINC01279    | 0.034291 | 0.011907 | 2.44E-06 | 0.323809 | -0.50642 | -0.83023 |
| LINC01420    | 4.58E-06 | 1.93E-07 | 4.29E-11 | 0.275503 | -0.34937 | -0.62487 |
| LIPC         | 0.001215 | 6.37E-08 | 1.01E-10 | -0.38772 | 0.742835 | 1.130557 |
| LIPG         | 0.382123 | 0.000293 | 1.39E-05 | -0.07743 | 0.567581 | 0.645009 |
| LMNB1        | 0.652575 | 0.00018  | 1.01E-05 | 0.082744 | -0.46074 | -0.54348 |
| LNP1         | 0.011857 | 5.39E-06 | 8.13E-10 | -0.19898 | 0.421145 | 0.620121 |
| LOC100130232 | 0.157227 | 9.47E-07 | 4.75E-07 | -0.07754 | 0.652845 | 0.730384 |
| LOC100131541 | 8.40E-06 | 0.00297  | 3.63E-09 | 0.430455 | -0.42195 | -0.8524  |
| LOC100132891 | 0.008827 | 5.39E-05 | 9.05E-09 | 0.205334 | -0.41024 | -0.61558 |

|                  |          |          |          |          |          |          |
|------------------|----------|----------|----------|----------|----------|----------|
| LOC1002<br>88911 | 0.019802 | 3.79E-06 | 1.36E-09 | 0.21644  | -0.68115 | -0.89759 |
| LOC1002<br>88974 | 0.042642 | 1.26E-07 | 5.72E-10 | -0.1178  | 0.440486 | 0.558291 |
| LOC1002<br>89098 | 0.009684 | 7.28E-05 | 2.25E-08 | -0.19642 | 0.342302 | 0.538717 |
| LOC1005<br>05501 | 0.000203 | 7.57E-06 | 3.40E-10 | 0.304673 | -0.51019 | -0.81487 |
| LOC1005<br>05812 | 1.46E-05 | 8.73E-07 | 4.51E-11 | 0.255659 | -0.32418 | -0.57984 |
| LOC1005<br>05985 | 0.010243 | 1.48E-08 | 2.92E-10 | -0.3346  | 1.101334 | 1.435931 |
| LOC1005<br>06076 | 0.000412 | 0.004958 | 4.75E-07 | 0.421491 | -0.40994 | -0.83143 |
| LOC1005<br>06098 | 2.35E-07 | 6.28E-11 | 1.57E-11 | 0.434446 | -0.69947 | -1.13392 |
| LOC1005<br>06123 | 0.000412 | 0.004958 | 4.75E-07 | 0.421491 | -0.40994 | -0.83143 |
| LOC1005<br>07389 | 0.080737 | 2.00E-06 | 3.87E-08 | -0.20233 | 0.899585 | 1.101912 |
| LOC1005<br>09445 | 0.063194 | 0.000109 | 2.36E-08 | 0.192198 | -0.45944 | -0.65164 |
| LOC1005<br>09457 | 0.038913 | 0.060196 | 0.000335 | 0.590563 | -0.71781 | -1.30837 |
| LOC1009<br>96756 | 0.307401 | 0.037344 | 0.000527 | -0.16173 | 0.425704 | 0.58743  |
| LOC1009<br>96809 | 9.25E-06 | 0.001205 | 1.10E-10 | 0.52861  | -0.52596 | -1.05457 |
| LOC1010<br>60609 | 0.656867 | 1.60E-06 | 2.22E-05 | -0.03064 | 0.480126 | 0.51077  |
| LOC1010<br>60835 | 1.56E-07 | 1.73E-06 | 1.70E-11 | 0.645461 | -0.70187 | -1.34733 |
| LOC1019<br>26960 | 0.004206 | 0.103214 | 1.09E-05 | -0.57805 | 0.150144 | 0.728199 |
| LOC1019<br>27180 | 0.000383 | 4.31E-07 | 7.00E-10 | 0.149779 | -0.3615  | -0.51128 |
| LOC1019<br>27263 | 0.022024 | 0.004011 | 7.98E-07 | 0.243085 | -0.35526 | -0.59835 |
| LOC1019<br>27287 | 0.056868 | 0.000667 | 6.50E-07 | -0.24228 | 0.51368  | 0.755964 |
| LOC1019<br>27331 | 0.011667 | 9.69E-05 | 2.25E-07 | -0.32511 | 0.640376 | 0.965486 |
| LOC1019<br>27733 | 2.80E-05 | 3.39E-12 | 1.57E-11 | 0.168293 | -0.47172 | -0.64001 |
| LOC1019<br>27809 | 0.003492 | 0.00284  | 1.06E-08 | -0.26375 | 0.321999 | 0.585754 |
| LOC1019<br>28102 | 0.003956 | 0.020147 | 1.27E-06 | 0.279699 | -0.25196 | -0.53166 |
| LOC1019<br>28104 | 0.001137 | 4.22E-05 | 5.17E-09 | -0.32332 | 0.302964 | 0.626286 |
| LOC1019<br>28230 | 0.000124 | 2.35E-08 | 1.95E-11 | -0.24744 | 0.460692 | 0.708129 |
| LOC1019<br>28274 | 0.003147 | 1.40E-09 | 2.31E-11 | 0.147606 | -0.41482 | -0.56243 |
| LOC1019<br>28429 | 0.000778 | 5.39E-05 | 8.19E-09 | 0.259751 | -0.58024 | -0.83999 |
| LOC1019<br>28505 | 0.105085 | 7.10E-06 | 0.000159 | 0.150074 | 0.525148 | 0.375074 |

|                  |          |          |          |          |          |          |
|------------------|----------|----------|----------|----------|----------|----------|
| LOC1019<br>28589 | 2.08E-06 | 4.52E-09 | 1.69E-11 | 0.246024 | -0.39898 | -0.645   |
| LOC1019<br>28615 | 0.000412 | 0.0007   | 4.49E-08 | 0.234019 | -0.26945 | -0.50347 |
| LOC1019<br>28620 | 3.06E-07 | 7.10E-06 | 7.28E-11 | 0.495367 | -0.54497 | -1.04034 |
| LOC1019<br>28789 | 3.67E-07 | 5.73E-05 | 1.29E-09 | 0.369761 | -0.45881 | -0.82857 |
| LOC1019<br>29143 | 0.001239 | 5.79E-06 | 9.52E-10 | -0.2092  | 0.297604 | 0.506801 |
| LOC1019<br>29475 | 0.448609 | 1.48E-07 | 2.66E-06 | -0.05023 | -0.51693 | -0.4667  |
| LOC1019<br>29500 | 0.001643 | 8.67E-05 | 2.30E-09 | 0.326576 | -0.42974 | -0.75632 |
| LOC1019<br>29829 | 0.09815  | 0.305266 | 0.002826 | -0.31601 | 0.281515 | 0.597521 |
| LOC1019<br>30489 | 0.000585 | 2.51E-11 | 2.96E-11 | 0.171061 | -0.65668 | -0.82774 |
| LOC1027<br>23845 | 0.047564 | 2.84E-08 | 4.91E-10 | -0.25775 | 0.944068 | 1.201821 |
| LOC1027<br>24156 | 0.008613 | 6.09E-05 | 1.02E-07 | 0.195703 | -0.49586 | -0.69157 |
| LOC1027<br>25343 | 0.140554 | 3.39E-07 | 3.63E-09 | -0.08946 | 0.42506  | 0.514518 |
| LOC1027<br>25526 | 0.000944 | 0.018797 | 2.33E-06 | 0.236482 | -0.26782 | -0.5043  |
| LOC1458<br>37    | 0.530366 | 0.018797 | 0.000618 | -0.13095 | 0.457631 | 0.588583 |
| LOC1497<br>03    | 0.131933 | 1.86E-06 | 2.15E-07 | -0.06997 | 0.485354 | 0.555321 |
| LOC1572<br>73    | 0.702732 | 0.000495 | 0.002132 | 0.111336 | 0.910568 | 0.799232 |
| LOC1584<br>02    | 9.77E-05 | 1.56E-05 | 1.79E-10 | 0.24577  | -0.3129  | -0.55867 |
| LOC2020<br>25    | 0.000422 | 0.114004 | 4.53E-07 | 0.346878 | -0.1691  | -0.51598 |
| LOC2846<br>69    | 0.012307 | 7.02E-08 | 1.79E-10 | -0.15987 | 0.358004 | 0.517877 |
| LOC2851<br>81    | 0.752556 | 3.33E-05 | 6.19E-06 | -0.02522 | 0.566723 | 0.591939 |
| LOC2856<br>28    | 0.000259 | 0.000189 | 7.37E-10 | 0.338195 | -0.50306 | -0.84125 |
| LOC3744<br>43    | 5.70E-05 | 9.05E-08 | 3.07E-11 | 0.196974 | -0.32702 | -0.52399 |
| LOC3898<br>31    | 0.761927 | 0.01525  | 0.003519 | -0.02201 | 0.48686  | 0.508873 |
| LOC7283<br>92    | 9.27E-07 | 0.000236 | 8.66E-11 | 0.440001 | -0.3502  | -0.7902  |
| LOC7287<br>15    | 0.063194 | 0.000109 | 2.36E-08 | 0.192198 | -0.45944 | -0.65164 |
| LOC7296<br>80    | 0.125205 | 0.0009   | 4.33E-07 | 0.149871 | -0.3769  | -0.52677 |
| LOC7301<br>01    | 0.137071 | 2.29E-05 | 6.26E-08 | -0.17581 | 0.636456 | 0.812266 |
| LOXL1            | 3.19E-07 | 1.38E-06 | 1.48E-10 | 0.605675 | -1.26413 | -1.8698  |
| LOXL4            | 0.99799  | 6.37E-08 | 1.23E-09 | 0.022438 | -0.57757 | -0.60001 |
| LPA              | 0.149521 | 1.01E-09 | 3.63E-09 | -0.0684  | 0.876058 | 0.944462 |
| LPAL2            | 0.037193 | 9.93E-09 | 1.36E-09 | -0.09668 | 0.466841 | 0.563521 |

|           |          |          |          |          |          |          |
|-----------|----------|----------|----------|----------|----------|----------|
| LPAR1     | 8.95E-07 | 2.15E-05 | 5.62E-11 | 0.233342 | -0.30597 | -0.53931 |
| LPAR5     | 1.80E-06 | 3.98E-05 | 1.10E-10 | 0.266489 | -0.28136 | -0.54785 |
| LPCAT1    | 2.94E-08 | 4.91E-10 | 1.57E-11 | 0.353156 | -0.5207  | -0.87385 |
| LRMP      | 0.000252 | 5.39E-06 | 5.62E-11 | 0.252523 | -0.36022 | -0.61274 |
| LRRC1     | 0.169737 | 8.07E-07 | 7.79E-09 | 0.105068 | -0.6767  | -0.78176 |
| LRRC19    | 0.761927 | 0.028038 | 0.053846 | 0.071531 | 0.690561 | 0.619031 |
| LRRC25    | 0.00101  | 0.00284  | 5.20E-08 | 0.232037 | -0.29745 | -0.52949 |
| LRRC32    | 0.014508 | 1.02E-06 | 4.03E-09 | 0.157646 | -0.44971 | -0.60735 |
| LSP1      | 4.75E-06 | 0.000211 | 3.11E-09 | 0.355268 | -0.31179 | -0.66706 |
| LST1      | 1.89E-05 | 0.000342 | 2.95E-09 | 0.352364 | -0.44285 | -0.79521 |
| LTBP2     | 0.000625 | 0.00199  | 1.85E-08 | 0.342265 | -0.46937 | -0.81164 |
| LUM       | 8.95E-07 | 1.48E-07 | 1.69E-11 | 0.68882  | -0.89454 | -1.58336 |
| LXN       | 8.41E-09 | 9.55E-12 | 1.57E-11 | 0.717318 | -1.36826 | -2.08558 |
| LY75      | 3.97E-07 | 0.029892 | 6.01E-10 | 0.457446 | -0.20155 | -0.659   |
| LY86      | 5.34E-07 | 1.29E-05 | 1.10E-10 | 0.426754 | -0.59156 | -1.01831 |
| LY9       | 0.004376 | 1.97E-08 | 1.48E-10 | 0.162022 | -0.42045 | -0.58248 |
| LY96      | 2.87E-08 | 3.53E-06 | 3.73E-11 | 0.535709 | -0.60511 | -1.14082 |
| LYN       | 1.55E-06 | 3.98E-05 | 9.12E-11 | 0.361743 | -0.38986 | -0.75161 |
| LYSMD2    | 4.90E-05 | 1.02E-06 | 4.19E-10 | 0.237494 | -0.29752 | -0.53501 |
| LYVE1     | 0.002065 | 0.000308 | 4.67E-09 | -0.42083 | 0.599232 | 1.02006  |
| LYZ       | 5.28E-06 | 6.97E-07 | 1.15E-10 | 0.891342 | -1.0981  | -1.98945 |
| MAB21L2   | 0.002778 | 4.53E-08 | 4.29E-11 | 0.209733 | -0.52359 | -0.73332 |
| MAD2L1    | 6.64E-05 | 7.59E-08 | 3.48E-11 | 0.315932 | -0.69277 | -1.0087  |
| MAFF      | 2.88E-05 | 7.59E-08 | 5.62E-11 | 0.364305 | -0.73649 | -1.10079 |
| MAGI2-AS3 | 0.316789 | 1.47E-05 | 9.30E-07 | -0.06749 | 0.471551 | 0.539042 |
| MAMDC4    | 0.265482 | 0.000342 | 1.44E-06 | -0.17048 | 0.62973  | 0.800209 |
| MAML2     | 2.32E-08 | 5.07E-05 | 3.91E-11 | 0.314369 | -0.26768 | -0.58205 |
| MAN2B1    | 1.73E-07 | 0.000171 | 7.95E-11 | 0.323817 | -0.28314 | -0.60696 |
| MANF      | 0.666416 | 6.09E-05 | 0.000134 | 0.072218 | -0.54516 | -0.61738 |
| MAOA      | 0.04831  | 7.37E-10 | 1.48E-10 | -0.07906 | 0.51205  | 0.591105 |
| MAP1LC3B  | 5.87E-05 | 1.26E-07 | 8.29E-11 | 0.203631 | -0.31805 | -0.52168 |
| MAP2      | 0.003085 | 3.12E-05 | 2.04E-08 | 0.195327 | -0.3566  | -0.55193 |
| MAP2K1    | 0.254338 | 7.36E-09 | 2.92E-10 | -0.11145 | 0.656721 | 0.768174 |
| MAP3K1    | 6.71E-07 | 8.67E-05 | 5.42E-11 | 0.285812 | -0.25211 | -0.53793 |
| MAP3K8    | 1.89E-05 | 0.046278 | 1.70E-07 | 0.31421  | -0.26618 | -0.58039 |
| MAP4K1    | 4.82E-07 | 2.58E-05 | 1.15E-10 | 0.289131 | -0.37997 | -0.6691  |
| MAP7D1    | 9.61E-06 | 2.29E-05 | 2.54E-09 | 0.262535 | -0.23777 | -0.50031 |
| MAPK13    | 0.000599 | 1.37E-07 | 5.62E-11 | 0.204777 | -0.58782 | -0.7926  |
| MAPRE1    | 2.02E-08 | 3.17E-10 | 1.57E-11 | 0.331006 | -0.46987 | -0.80087 |
| 1-Mar     | 0.011667 | 1.10E-06 | 7.70E-10 | -0.21702 | 0.485259 | 0.702279 |
| 2-Mar     | 9.77E-05 | 4.91E-10 | 1.60E-11 | -0.25792 | 0.599666 | 0.857582 |
| 1-Mar     | 4.98E-09 | 6.20E-06 | 1.57E-11 | 0.489515 | -0.48048 | -0.96999 |
| MARCKS    | 1.38E-08 | 1.12E-09 | 1.57E-11 | 0.45287  | -0.53528 | -0.98815 |
| MAT1A     | 0.004559 | 5.95E-12 | 1.82E-11 | -0.11961 | 0.617814 | 0.737422 |
| MBL1P     | 0.042642 | 1.26E-07 | 5.72E-10 | -0.1178  | 0.440486 | 0.558291 |
| MBOAT1    | 0.000232 | 0.002595 | 3.11E-09 | 0.408419 | -0.3169  | -0.72532 |
| MCAM      | 3.67E-07 | 0.000103 | 4.51E-11 | 0.275546 | -0.30961 | -0.58515 |
| MCEE      | 0.003492 | 1.37E-07 | 5.72E-10 | -0.1628  | 0.384262 | 0.547065 |
| MCM10     | 0.024383 | 2.27E-07 | 1.17E-09 | 0.117985 | -0.58957 | -0.70755 |
| MCM2      | 4.27E-08 | 7.37E-10 | 1.57E-11 | 0.494112 | -1.00829 | -1.5024  |
| MCM3      | 3.14E-06 | 3.77E-11 | 1.57E-11 | 0.342109 | -0.6931  | -1.03521 |
| MCM4      | 0.00567  | 2.84E-08 | 2.19E-10 | 0.116027 | -0.39607 | -0.5121  |
| MCM5      | 8.15E-09 | 8.26E-08 | 1.69E-11 | 0.490106 | -0.65928 | -1.14938 |
| MCM6      | 6.58E-09 | 9.20E-10 | 1.57E-11 | 0.429298 | -0.65257 | -1.08187 |
| MCM7      | 0.000226 | 2.89E-07 | 5.92E-11 | 0.189514 | -0.38968 | -0.57919 |
| MCOLN2    | 3.07E-05 | 2.75E-05 | 7.00E-10 | 0.281682 | -0.35524 | -0.63693 |

|                 |          |          |          |          |          |          |
|-----------------|----------|----------|----------|----------|----------|----------|
| MCTP1           | 1.77E-05 | 6.85E-05 | 7.70E-10 | 0.288828 | -0.37553 | -0.66436 |
| MDFIC           | 0.001294 | 4.06E-06 | 2.79E-10 | 0.194615 | -0.30797 | -0.50258 |
| MDN1            | 0.224626 | 3.07E-06 | 1.78E-07 | -0.12124 | 0.428722 | 0.549957 |
| ME1             | 0.003636 | 1.10E-06 | 3.63E-09 | 0.244364 | -0.4273  | -0.67166 |
| ME2             | 2.94E-06 | 1.93E-07 | 6.26E-11 | 0.290964 | -0.35853 | -0.64949 |
| MELK            | 1.42E-05 | 1.77E-07 | 3.21E-11 | 0.508662 | -1.08286 | -1.59152 |
| MEOX1           | 0.021277 | 0.000223 | 5.20E-08 | 0.178087 | -0.38582 | -0.5639  |
| METRNL          | 6.41E-08 | 2.03E-05 | 9.12E-11 | 0.458918 | -0.4097  | -0.86862 |
| MFAP4           | 3.14E-06 | 0.000115 | 6.94E-11 | 0.578371 | -0.66812 | -1.2465  |
| MFSD1           | 1.19E-07 | 1.90E-05 | 5.92E-11 | 0.243004 | -0.27164 | -0.51465 |
| MFSD6           | 1.35E-06 | 6.06E-09 | 1.69E-11 | 0.254559 | -0.43613 | -0.69069 |
| MGMT            | 0.00101  | 3.53E-06 | 1.43E-09 | -0.18784 | 0.320519 | 0.508362 |
| MGP             | 3.04E-08 | 0.001666 | 9.12E-11 | 0.649056 | -0.37998 | -1.02903 |
| MICAL1          | 1.85E-09 | 2.65E-09 | 1.57E-11 | 0.545969 | -0.57875 | -1.12472 |
| MICALL1         | 0.000922 | 1.86E-06 | 7.00E-10 | 0.203791 | -0.3135  | -0.5173  |
| MICB            | 3.36E-06 | 4.77E-05 | 3.73E-11 | 0.356883 | -0.30938 | -0.66626 |
| MID1IP1         | 0.11723  | 0.001517 | 3.29E-06 | 0.211361 | -0.4202  | -0.63156 |
| MIR155          | 2.44E-10 | 5.36E-08 | 1.57E-11 | 0.972394 | -1.16422 | -2.13662 |
| MIR155H<br>G    | 2.44E-10 | 5.36E-08 | 1.57E-11 | 0.972394 | -1.16422 | -2.13662 |
| MIR1908         | 0.906416 | 0.029892 | 0.012631 | -0.00847 | -0.73118 | -0.7227  |
| MIR21           | 0.000164 | 2.16E-11 | 3.73E-11 | 0.219497 | -0.58653 | -0.80603 |
| MIR224          | 0.004031 | 0.00297  | 2.98E-07 | 0.462644 | -0.56832 | -1.03096 |
| MIR34A          | 3.44E-07 | 0.231418 | 3.63E-09 | 0.674417 | -0.17393 | -0.84835 |
| MIR4435-<br>1HG | 0.000188 | 3.83E-12 | 1.57E-11 | 0.142947 | -0.49093 | -0.63388 |
| MIR452          | 0.004031 | 0.00297  | 2.98E-07 | 0.462644 | -0.56832 | -1.03096 |
| MIR6734         | 0.000169 | 2.16E-11 | 2.43E-11 | 0.200547 | -0.41529 | -0.61583 |
| MIR675          | 0.006643 | 0.065616 | 2.58E-05 | 0.698016 | -0.46567 | -1.16368 |
| MIR6756         | 4.46E-07 | 0.000495 | 8.29E-11 | 0.260159 | -0.25512 | -0.51528 |
| MIR6778         | 0.006001 | 1.38E-05 | 4.23E-09 | -0.19499 | 0.372973 | 0.567963 |
| MIR7703         | 0.003419 | 9.27E-06 | 1.72E-10 | 0.188252 | -0.3696  | -0.55785 |
| MIR8071-<br>1   | 5.98E-08 | 0.00018  | 7.58E-11 | 0.875599 | -0.44868 | -1.32428 |
| MIR8071-<br>2   | 5.98E-08 | 0.00018  | 7.58E-11 | 0.875599 | -0.44868 | -1.32428 |
| MKI67           | 0.067013 | 9.05E-08 | 1.96E-09 | 0.076928 | -0.49492 | -0.57185 |
| MLKL            | 2.55E-06 | 7.38E-11 | 1.57E-11 | 0.316597 | -0.47458 | -0.79118 |
| MLLT11          | 0.030526 | 2.43E-05 | 3.52E-08 | 0.262255 | -0.79351 | -1.05576 |
| MLPH            | 0.217268 | 1.56E-05 | 5.94E-07 | -0.09439 | 0.410824 | 0.505217 |
| MLXIPL          | 0.06045  | 6.74E-09 | 1.23E-08 | -0.1065  | 0.576067 | 0.682571 |
| MMAB            | 0.017877 | 0.000211 | 1.06E-06 | -0.17119 | 0.334507 | 0.505694 |
| MMD             | 0.016372 | 5.51E-07 | 7.70E-10 | 0.108844 | -0.39994 | -0.50878 |
| MME             | 0.144149 | 1.77E-07 | 1.72E-10 | -0.24007 | 0.84518  | 1.085247 |
| MMGT1           | 8.20E-05 | 2.46E-07 | 8.66E-11 | 0.283949 | -0.27108 | -0.55503 |
| MMP7            | 2.97E-05 | 7.36E-09 | 1.91E-11 | 0.523928 | -1.19038 | -1.7143  |
| MMP9            | 0.006907 | 0.036235 | 7.90E-06 | 0.324517 | -0.40158 | -0.7261  |
| MND1            | 0.003492 | 1.08E-08 | 2.87E-11 | 0.291072 | -1.13023 | -1.4213  |
| MNDA            | 2.51E-07 | 1.06E-05 | 1.70E-11 | 0.598407 | -0.58349 | -1.1819  |
| MNS1            | 0.003419 | 3.53E-10 | 3.21E-11 | 0.26404  | -0.91293 | -1.17697 |
| MOB1A           | 6.78E-06 | 0.000775 | 4.91E-10 | 0.319215 | -0.29333 | -0.61254 |
| MOGAT1          | 0.011462 | 0.000189 | 4.12E-07 | -0.28068 | 0.541939 | 0.82262  |
| MOGAT2          | 0.047564 | 6.70E-10 | 8.66E-11 | -0.10747 | 0.473725 | 0.581196 |
| MORC4           | 0.002153 | 4.97E-12 | 1.57E-11 | 0.265799 | -0.99835 | -1.26415 |
| MOXD1           | 0.008506 | 2.87E-06 | 5.73E-09 | 0.12719  | -0.59736 | -0.72455 |
| MPDZ            | 0.008205 | 4.97E-12 | 1.56E-10 | -0.14479 | 0.542291 | 0.687077 |
| MPEG1           | 4.56E-08 | 1.47E-05 | 2.58E-11 | 0.501038 | -0.43718 | -0.93822 |
| MPND            | 0.009337 | 1.60E-06 | 1.59E-09 | -0.1756  | 0.380131 | 0.555735 |

|         |          |          |          |          |          |          |
|---------|----------|----------|----------|----------|----------|----------|
| MPPED1  | 0.000383 | 0.001517 | 2.25E-08 | -0.31479 | 0.281898 | 0.59669  |
| MPV17   | 2.31E-06 | 2.18E-09 | 2.38E-11 | 0.245521 | -0.45162 | -0.69714 |
| MR1     | 5.15E-08 | 9.89E-06 | 1.64E-11 | 0.2965   | -0.23857 | -0.53507 |
| MROH2A  | 0.004122 | 0.000121 | 2.07E-09 | -0.8723  | 1.150884 | 2.023183 |
| MS4A1   | 4.58E-06 | 5.39E-06 | 2.31E-10 | 0.41478  | -0.59034 | -1.00512 |
| MS4A4A  | 2.74E-05 | 3.07E-06 | 5.92E-11 | 0.305032 | -0.42277 | -0.7278  |
| MS4A7   | 6.06E-05 | 3.12E-05 | 1.48E-10 | 0.422796 | -0.54525 | -0.96805 |
| MSH2    | 4.58E-06 | 5.10E-07 | 5.62E-11 | 0.455024 | -0.47555 | -0.93058 |
| MSR1    | 2.74E-06 | 0.000381 | 1.99E-10 | 0.308918 | -0.28226 | -0.59118 |
| MT1F    | 0.033144 | 0.00284  | 6.50E-07 | -0.23393 | 0.459886 | 0.693819 |
| MT1G    | 0.041384 | 0.00018  | 1.11E-08 | -0.24946 | 0.498938 | 0.748397 |
| MT1H    | 0.037783 | 0.002077 | 1.71E-06 | -0.1735  | 0.334328 | 0.507827 |
| MT1M    | 0.019802 | 0.028038 | 6.44E-06 | -0.51351 | 0.684419 | 1.197928 |
| MT1X    | 0.017877 | 6.85E-05 | 3.18E-08 | -0.16696 | 0.412651 | 0.579616 |
| MTCL1   | 0.000124 | 1.38E-05 | 2.92E-10 | 0.435311 | -0.6419  | -1.07721 |
| MTHFD2  | 8.36E-07 | 2.39E-09 | 2.78E-11 | 0.374754 | -0.57041 | -0.94516 |
| MTMR11  | 0.004122 | 0.004364 | 5.43E-09 | 0.237663 | -0.2877  | -0.52536 |
| MTMR2   | 2.55E-06 | 3.66E-07 | 2.19E-10 | 0.225172 | -0.33304 | -0.55822 |
| MUM1L1  | 0.040115 | 0.001095 | 1.32E-06 | 0.296482 | -0.62323 | -0.91971 |
| MVP     | 1.46E-05 | 1.20E-08 | 4.51E-11 | 0.371304 | -0.60786 | -0.97916 |
| MX1     | 0.000156 | 0.047733 | 3.11E-07 | 0.58376  | -0.56232 | -1.14608 |
| MX2     | 2.80E-05 | 0.105713 | 3.18E-08 | 0.516508 | -0.37054 | -0.88705 |
| MXI1    | 0.000778 | 9.20E-10 | 5.62E-11 | -0.23421 | 0.495388 | 0.729601 |
| MXRA5   | 0.000193 | 0.019452 | 7.40E-09 | 0.387312 | -0.26608 | -0.65339 |
| MYC     | 1.68E-07 | 2.16E-11 | 1.57E-11 | 0.528914 | -0.99828 | -1.5272  |
| MYL12B  | 2.58E-05 | 2.41E-12 | 2.43E-11 | 0.137327 | -0.37162 | -0.50894 |
| MYO16   | 0.301136 | 1.77E-07 | 3.63E-09 | -0.11284 | 0.563928 | 0.676766 |
| MYO1F   | 1.23E-09 | 0.000189 | 2.21E-11 | 0.445082 | -0.29981 | -0.74489 |
| MYO1G   | 1.67E-05 | 3.07E-06 | 2.96E-11 | 0.293614 | -0.39978 | -0.6934  |
| MYO5A   | 4.42E-09 | 5.51E-07 | 1.58E-11 | 0.293145 | -0.31417 | -0.60732 |
| MYOF    | 9.13E-08 | 1.29E-05 | 4.29E-11 | 0.381691 | -0.34815 | -0.72984 |
| MYOM1   | 0.052793 | 0.446815 | 0.005378 | 0.411554 | -0.18184 | -0.5934  |
| MZB1    | 1.94E-06 | 7.48E-07 | 1.27E-10 | 0.489975 | -0.87871 | -1.36868 |
| NAA40   | 2.02E-07 | 4.70E-06 | 7.58E-11 | 0.286492 | -0.26794 | -0.55443 |
| NABP1   | 2.55E-06 | 1.86E-06 | 1.57E-11 | 0.368451 | -0.43563 | -0.80408 |
| NAGK    | 1.17E-05 | 1.06E-05 | 2.95E-09 | 0.253309 | -0.37453 | -0.62784 |
| NAGS    | 0.336738 | 1.26E-07 | 5.44E-08 | -0.08785 | 0.594401 | 0.682248 |
| NALCN   | 0.000329 | 4.77E-05 | 3.58E-10 | 0.219847 | -0.42653 | -0.64637 |
| NAP1L1  | 1.44E-08 | 1.08E-08 | 1.58E-11 | 0.346014 | -0.36304 | -0.70905 |
| NAP1L3  | 0.006779 | 0.055393 | 3.01E-05 | 0.367798 | -0.27213 | -0.63993 |
| NAPSB   | 0.000138 | 0.162    | 2.05E-05 | 0.448344 | -0.19114 | -0.63948 |
| NARR    | 7.54E-08 | 3.77E-11 | 1.57E-11 | 0.434585 | -0.69464 | -1.12923 |
| NBEA    | 0.012087 | 0.009067 | 2.85E-07 | 0.272249 | -0.35255 | -0.6248  |
| NCAPD2  | 0.040743 | 0.001095 | 4.12E-07 | 0.203934 | -0.31071 | -0.51464 |
| NCAPG   | 0.000571 | 1.93E-07 | 4.10E-11 | 0.346259 | -1.02029 | -1.36655 |
| NCEH1   | 1.93E-08 | 1.90E-05 | 2.13E-11 | 0.837006 | -0.66772 | -1.50472 |
| NCF1    | 4.46E-07 | 8.71E-06 | 5.42E-11 | 0.475259 | -0.50324 | -0.9785  |
| NCF1B   | 6.90E-07 | 3.12E-05 | 7.95E-11 | 0.470598 | -0.47887 | -0.94947 |
| NCF1C   | 6.90E-07 | 3.12E-05 | 7.95E-11 | 0.470598 | -0.47887 | -0.94947 |
| NCF2    | 3.55E-07 | 1.18E-06 | 7.58E-11 | 0.488201 | -0.71039 | -1.19859 |
| NCF4    | 3.69E-06 | 5.73E-05 | 2.08E-10 | 0.366157 | -0.43258 | -0.79874 |
| NCK2    | 4.29E-06 | 0.000775 | 4.03E-09 | 0.3752   | -0.40342 | -0.77862 |
| NCKAP1L | 4.98E-09 | 3.98E-05 | 2.87E-11 | 0.425062 | -0.38801 | -0.81307 |
| NDC80   | 1.60E-07 | 2.09E-07 | 1.77E-11 | 0.767343 | -1.12022 | -1.88756 |
| NDN     | 0.000311 | 0.000277 | 1.58E-08 | 0.288329 | -0.39302 | -0.68135 |
| NEB     | 0.016372 | 0.000263 | 2.42E-09 | 0.379322 | -0.54113 | -0.92045 |
| NEDD9   | 6.44E-05 | 4.33E-11 | 1.57E-11 | 0.162132 | -0.34694 | -0.50907 |
| NELL2   | 0.003289 | 0.000401 | 1.59E-09 | 0.305869 | -0.48249 | -0.78836 |

|               |          |          |          |          |          |          |
|---------------|----------|----------|----------|----------|----------|----------|
| NETO2         | 0.033144 | 4.91E-08 | 9.01E-10 | 0.119625 | -0.43052 | -0.55014 |
| NEU4          | 0.014761 | 1.78E-05 | 4.71E-08 | -0.16551 | 0.413188 | 0.578696 |
| NEURL1B       | 8.15E-09 | 5.73E-05 | 5.62E-11 | 0.52306  | -0.34777 | -0.87083 |
| NEURL3        | 0.009798 | 7.57E-06 | 1.59E-09 | 0.192595 | -0.38445 | -0.57704 |
| NEXN          | 0.00225  | 7.74E-05 | 2.92E-10 | 0.411634 | -0.58463 | -0.99627 |
| NFE2L3        | 2.50E-05 | 4.02E-09 | 1.57E-11 | 0.212379 | -0.52745 | -0.73983 |
| NFKBIE        | 1.94E-07 | 2.67E-07 | 1.91E-11 | 0.376814 | -0.49419 | -0.87101 |
| NFKBIZ        | 0.437549 | 0.000171 | 2.68E-05 | -0.09451 | 0.467732 | 0.562243 |
| NKG7          | 6.78E-06 | 0.000263 | 1.96E-09 | 0.507165 | -0.55957 | -1.06674 |
| NLRC3         | 3.55E-07 | 4.55E-06 | 6.94E-11 | 0.485902 | -0.5003  | -0.9862  |
| NLRC5         | 1.25E-06 | 7.57E-06 | 3.48E-11 | 0.650231 | -0.6287  | -1.27894 |
| NME5          | 0.133573 | 0.000153 | 5.03E-06 | 0.142758 | -0.57178 | -0.71454 |
| NMI           | 0.015305 | 0.000115 | 4.45E-09 | 0.170021 | -0.34897 | -0.51899 |
| NMRK1         | 0.329836 | 6.28E-11 | 7.28E-11 | -0.0586  | 0.465637 | 0.524237 |
| NOD2          | 9.58E-07 | 2.29E-05 | 1.56E-10 | 0.445088 | -0.43172 | -0.87681 |
| NOL4          | 0.326583 | 0.007177 | 0.00017  | -0.12533 | 0.377099 | 0.502431 |
| NPC2          | 2.48E-06 | 3.14E-07 | 8.66E-11 | 0.27937  | -0.43745 | -0.71682 |
| NPNT          | 0.011462 | 0.000858 | 6.50E-07 | 0.173757 | -0.46374 | -0.6375  |
| NPTX2         | 0.091674 | 0.002175 | 6.79E-07 | 0.178336 | -0.45103 | -0.62936 |
| NPW           | 0.003572 | 0.006364 | 5.20E-07 | 0.715169 | -0.6716  | -1.38677 |
| NPY6R         | 0.191062 | 0.006112 | 0.030142 | 0.175793 | 0.507702 | 0.331909 |
| NQO1          | 0.50179  | 5.07E-05 | 1.11E-06 | 0.05418  | -0.8897  | -0.94388 |
| NR1I2         | 0.003956 | 3.12E-08 | 2.66E-10 | -0.17751 | 0.518621 | 0.696133 |
| NR1I3         | 0.023556 | 1.73E-10 | 1.01E-10 | -0.14465 | 0.631048 | 0.775703 |
| NR3C2         | 0.177862 | 1.16E-10 | 1.06E-09 | -0.04702 | 0.539387 | 0.586409 |
| NRROS         | 3.84E-06 | 0.014722 | 9.05E-09 | 0.288598 | -0.21838 | -0.50698 |
| NSUN6         | 0.522219 | 1.28E-06 | 7.90E-06 | -0.01846 | 0.533721 | 0.552184 |
| NT5C3A        | 0.00112  | 0.000114 | 1.11E-09 | 0.212277 | -0.34652 | -0.55879 |
| NTHL1         | 0.003419 | 6.66E-06 | 6.02E-09 | -0.20397 | 0.340416 | 0.544387 |
| NTS           | 0.003085 | 1.29E-05 | 2.19E-10 | 0.624708 | -1.31453 | -1.93923 |
| NUAK2         | 9.25E-06 | 0.000362 | 2.08E-10 | 0.42888  | -0.35847 | -0.78735 |
| NUF2          | 0.005564 | 2.49E-06 | 5.17E-11 | 0.264887 | -0.66878 | -0.93367 |
| NUPR1         | 0.056868 | 7.36E-09 | 3.58E-10 | -0.16016 | 0.432371 | 0.592528 |
| NUSAP1        | 9.25E-06 | 0.000189 | 3.21E-11 | 0.559315 | -0.70847 | -1.26778 |
| OAS1          | 0.028997 | 0.177315 | 0.000284 | 0.267705 | -0.29622 | -0.56393 |
| OAS2          | 0.000383 | 0.000635 | 1.11E-09 | 0.358974 | -0.54219 | -0.90116 |
| OAT           | 0.191062 | 0.006623 | 4.05E-05 | -0.16634 | 0.544368 | 0.710704 |
| ODC1          | 0.292008 | 3.77E-11 | 1.01E-10 | 0.092806 | -0.77209 | -0.8649  |
| OGFRL1        | 4.03E-09 | 1.18E-06 | 1.91E-11 | 0.424279 | -0.31947 | -0.74375 |
| OIP5          | 0.001722 | 1.48E-06 | 1.64E-10 | 0.330441 | -0.82879 | -1.15923 |
| OLFML1        | 0.000117 | 0.001517 | 5.73E-09 | 0.392006 | -0.32693 | -0.71894 |
| OLFML2B       | 0.007314 | 0.000109 | 2.75E-08 | 0.184881 | -0.38656 | -0.57144 |
| OLFML3        | 3.49E-05 | 0.015804 | 2.75E-08 | 0.392041 | -0.21109 | -0.60313 |
| ORC6          | 0.005041 | 1.16E-07 | 3.07E-10 | 0.152972 | -0.59652 | -0.7495  |
| OSBPL3        | 2.44E-10 | 1.12E-09 | 2.04E-11 | 0.615279 | -0.69474 | -1.31002 |
| OSBPL6        | 0.639418 | 1.13E-05 | 5.44E-07 | -0.04303 | 0.483208 | 0.526239 |
| OSCAR         | 0.009684 | 4.06E-06 | 3.11E-09 | 0.175712 | -0.41219 | -0.5879  |
| OSMR          | 7.51E-05 | 3.12E-05 | 2.56E-10 | 0.308745 | -0.4064  | -0.71515 |
| OTUD6B        | 0.003085 | 0.001453 | 5.44E-08 | 0.298814 | -0.32876 | -0.62757 |
| OVGP1         | 0.029978 | 7.73E-07 | 1.27E-10 | -0.1434  | 0.551641 | 0.695043 |
| OVOS          | 0.063194 | 0.000109 | 2.36E-08 | 0.192198 | -0.45944 | -0.65164 |
| OVOS2         | 0.063194 | 0.000109 | 2.36E-08 | 0.192198 | -0.45944 | -0.65164 |
| OXCT1         | 8.95E-08 | 6.47E-07 | 2.38E-11 | 0.496076 | -0.60537 | -1.10145 |
| P2RX5         | 1.13E-05 | 4.33E-11 | 1.57E-11 | 0.28777  | -0.54378 | -0.83155 |
| P2RX5-TAX1BP3 | 2.21E-05 | 6.28E-11 | 1.69E-11 | 0.384727 | -0.73882 | -1.12355 |
| P2RY12        | 0.005359 | 0.061959 | 1.23E-05 | 0.313061 | -0.30005 | -0.61312 |
| P2RY13        | 2.94E-06 | 0.00297  | 1.11E-09 | 0.546128 | -0.39679 | -0.94292 |

|          |          |          |          |          |          |          |
|----------|----------|----------|----------|----------|----------|----------|
| P2RY14   | 1.77E-05 | 0.000635 | 1.36E-09 | 0.413975 | -0.44557 | -0.85955 |
| P2RY8    | 2.74E-06 | 2.84E-08 | 1.60E-11 | 0.40971  | -0.65692 | -1.06663 |
| PACSIN3  | 0.001326 | 6.97E-07 | 4.67E-10 | -0.29557 | 0.58704  | 0.882615 |
| PAG1     | 1.22E-09 | 4.91E-08 | 1.57E-11 | 0.58472  | -0.47216 | -1.05688 |
| PAIP2B   | 0.010046 | 1.26E-09 | 4.29E-11 | -0.18457 | 0.617322 | 0.801887 |
| PALLD    | 0.001603 | 2.39E-09 | 8.29E-11 | 0.229743 | -0.5557  | -0.78545 |
| PALM2    | 0.227098 | 2.31E-06 | 1.62E-07 | -0.07025 | 0.481262 | 0.551517 |
| PALM3    | 0.099526 | 8.17E-05 | 1.21E-06 | -0.10013 | 0.42798  | 0.528105 |
| PAM      | 0.000142 | 1.13E-05 | 3.40E-10 | 0.248151 | -0.30613 | -0.55429 |
| PAN2     | 0.042025 | 2.89E-07 | 2.14E-08 | -0.10674 | 0.418178 | 0.524919 |
| PANK1    | 0.289029 | 3.66E-07 | 3.43E-07 | -0.0757  | 0.471527 | 0.547224 |
| PAPLN    | 2.09E-07 | 4.49E-05 | 5.17E-11 | 0.370002 | -0.39952 | -0.76952 |
| PAPSS1   | 0.019115 | 5.39E-06 | 8.19E-09 | 0.174306 | -0.33899 | -0.51329 |
| PAQR5    | 0.072174 | 0.000605 | 1.28E-07 | 0.147446 | -0.39287 | -0.54031 |
| PAQR8    | 1.23E-09 | 9.89E-08 | 1.57E-11 | 0.473823 | -0.55364 | -1.02746 |
| PARP12   | 6.71E-07 | 3.98E-05 | 5.72E-10 | 0.347654 | -0.40072 | -0.74837 |
| PARP8    | 4.03E-09 | 2.35E-08 | 1.57E-11 | 0.459384 | -0.44209 | -0.90147 |
| PARVG    | 2.74E-05 | 5.10E-07 | 7.95E-11 | 0.197252 | -0.33552 | -0.53278 |
| PBK      | 4.18E-05 | 3.29E-06 | 3.48E-11 | 0.854471 | -1.3762  | -2.23067 |
| PBLD     | 0.002021 | 1.10E-06 | 7.00E-10 | -0.19828 | 0.427507 | 0.625787 |
| PCBD1    | 0.000965 | 1.48E-07 | 8.29E-11 | -0.27457 | 0.467228 | 0.741797 |
| PCDH17   | 0.002344 | 0.000858 | 2.89E-08 | 0.250575 | -0.41257 | -0.66315 |
| PCED1B   | 3.55E-07 | 2.89E-07 | 2.96E-11 | 0.416473 | -0.46546 | -0.88193 |
| PCK1     | 0.157227 | 0.000362 | 2.79E-05 | -0.30039 | 0.950871 | 1.25126  |
| PCNA     | 3.04E-06 | 2.26E-10 | 1.57E-11 | 0.346196 | -0.66459 | -1.01078 |
| PCOLCE2  | 0.000238 | 9.89E-08 | 2.19E-10 | -0.59365 | 1.574618 | 2.168272 |
| PCYOX1L  | 0.000214 | 5.97E-07 | 4.29E-11 | 0.283077 | -0.45507 | -0.73815 |
| PDGFA    | 0.000585 | 1.37E-07 | 2.04E-11 | 0.289954 | -0.59517 | -0.88513 |
| PDGFD    | 6.26E-07 | 0.001737 | 2.81E-09 | 0.476145 | -0.42603 | -0.90218 |
| PDK4     | 0.19349  | 8.71E-06 | 4.28E-08 | -0.20387 | 0.945017 | 1.148885 |
| PDP1     | 8.95E-07 | 4.37E-06 | 5.92E-11 | 0.315668 | -0.38709 | -0.70276 |
| PDZK1IP1 | 0.008827 | 1.66E-05 | 3.97E-10 | 0.33436  | -1.08367 | -1.41803 |
| PDZRN3   | 1.15E-06 | 0.008401 | 4.23E-09 | 0.278888 | -0.24108 | -0.51997 |
| PEA15    | 2.88E-05 | 1.33E-08 | 3.48E-11 | 0.279622 | -0.40891 | -0.68853 |
| PECAM1   | 7.49E-09 | 1.40E-09 | 1.57E-11 | 0.271087 | -0.33986 | -0.61094 |
| PEG10    | 0.086703 | 0.090918 | 0.000657 | 0.269685 | -0.59962 | -0.86931 |
| PFKFB3   | 0.000159 | 0.010145 | 2.54E-09 | 0.586749 | -0.3958  | -0.98255 |
| PFKP     | 1.77E-05 | 5.36E-08 | 3.91E-11 | 0.19669  | -0.40373 | -0.60042 |
| PFN2     | 0.042642 | 0.311163 | 0.000313 | -0.33069 | 0.211388 | 0.542082 |
| PHF19    | 2.72E-07 | 1.01E-09 | 1.95E-11 | 0.231936 | -0.4637  | -0.69563 |
| PHLDA1   | 2.74E-06 | 5.97E-07 | 2.79E-10 | 0.405819 | -0.59513 | -1.00095 |
| PHLDA2   | 0.007751 | 8.21E-11 | 5.62E-11 | 0.101005 | -0.48733 | -0.58833 |
| PHYHD1   | 0.023164 | 8.07E-07 | 5.62E-11 | -0.17329 | 0.427    | 0.600289 |
| PIGR     | 0.000338 | 3.33E-05 | 2.66E-10 | 0.257145 | -0.34684 | -0.60399 |
| PIK3C2G  | 0.032081 | 1.48E-06 | 1.17E-07 | -0.13306 | 0.450937 | 0.583999 |
| PIK3CG   | 3.61E-09 | 5.97E-07 | 2.04E-11 | 0.273031 | -0.28012 | -0.55315 |
| PIK3R3   | 1.95E-05 | 1.38E-06 | 1.41E-10 | 0.233788 | -0.27069 | -0.50448 |
| PILRA    | 6.03E-09 | 8.17E-05 | 3.73E-11 | 0.40209  | -0.4144  | -0.81649 |
| PIM2     | 2.65E-05 | 2.93E-05 | 1.48E-10 | 0.238115 | -0.3037  | -0.54182 |
| PIR      | 0.064163 | 0.000171 | 2.47E-07 | 0.185449 | -0.3765  | -0.56195 |
| PIWIL4   | 2.82E-07 | 0.000277 | 6.34E-10 | 0.355111 | -0.48151 | -0.83662 |
| PJA1     | 0.003786 | 3.14E-07 | 4.19E-10 | 0.188061 | -0.35007 | -0.53813 |
| PKDCC    | 0.002837 | 9.17E-05 | 5.73E-09 | 0.209416 | -0.39207 | -0.60148 |
| PKIB     | 0.131933 | 0.000189 | 9.21E-08 | 0.22876  | -0.69052 | -0.91928 |
| PKLR     | 0.001531 | 2.27E-07 | 3.58E-10 | -0.26474 | 0.51567  | 0.780406 |
| PKM      | 0.000238 | 6.37E-08 | 1.21E-10 | 0.199961 | -0.39003 | -0.58999 |
| PLA2G2A  | 0.240437 | 0.003104 | 0.000121 | 0.347031 | -1.02841 | -1.37544 |
| PLA2G4A  | 1.87E-07 | 5.86E-08 | 1.95E-11 | 0.474133 | -0.57456 | -1.0487  |

|              |          |          |          |          |          |          |
|--------------|----------|----------|----------|----------|----------|----------|
| PLA2G7       | 0.00011  | 1.56E-05 | 2.19E-10 | 0.584558 | -0.88917 | -1.47373 |
| PLAC8        | 0.000259 | 0.173471 | 7.90E-06 | 0.318147 | -0.21243 | -0.53058 |
| PLAGL1       | 6.58E-09 | 2.00E-06 | 3.91E-11 | 0.544735 | -0.45939 | -1.00412 |
| PLAT         | 0.025223 | 0.332437 | 0.000846 | 0.318318 | -0.18555 | -0.50387 |
| PLAUR        | 0.000612 | 5.47E-10 | 3.91E-11 | 0.128622 | -0.39723 | -0.52585 |
| PLBD1        | 2.87E-08 | 2.67E-07 | 3.21E-11 | 0.514621 | -0.63543 | -1.15005 |
| PLCXD3       | 1.25E-06 | 0.000136 | 5.72E-10 | 0.503677 | -0.72799 | -1.23166 |
| PLEK         | 1.33E-07 | 0.001264 | 3.97E-10 | 0.466634 | -0.47588 | -0.94252 |
| PLEKHO1      | 8.36E-07 | 6.37E-08 | 1.57E-11 | 0.396393 | -0.5382  | -0.93459 |
| PLEKHO2      | 0.000142 | 6.47E-07 | 5.16E-10 | 0.214892 | -0.30948 | -0.52437 |
| PLG          | 0.008345 | 3.93E-10 | 6.01E-10 | -0.06604 | 0.485207 | 0.551244 |
| PLIN1        | 0.99799  | 0.000103 | 7.32E-05 | -0.00637 | 0.699295 | 0.705666 |
| PLIN3        | 0.000142 | 1.78E-08 | 6.59E-11 | 0.223648 | -0.37198 | -0.59562 |
| PLK2         | 8.36E-07 | 2.58E-05 | 6.94E-11 | 0.469026 | -0.31844 | -0.78747 |
| PLP2         | 1.03E-08 | 5.44E-09 | 1.57E-11 | 0.501337 | -0.6612  | -1.16253 |
| PLSCR1       | 0.000198 | 1.28E-06 | 1.27E-10 | 0.18327  | -0.32096 | -0.50424 |
| PLTP         | 1.51E-05 | 3.74E-05 | 3.97E-10 | 0.417787 | -0.4722  | -0.88999 |
| PLXDC2       | 6.41E-08 | 1.37E-07 | 1.72E-11 | 0.31682  | -0.39716 | -0.71398 |
| PLXNC1       | 1.38E-07 | 7.59E-08 | 1.85E-11 | 0.259396 | -0.25967 | -0.51907 |
| PMEPA1       | 3.82E-05 | 2.93E-05 | 1.56E-10 | 0.421179 | -0.61277 | -1.03395 |
| PNMA1        | 8.73E-09 | 1.30E-10 | 1.57E-11 | 0.461187 | -0.59305 | -1.05423 |
| PNMA2        | 0.000103 | 2.31E-06 | 2.78E-11 | 0.238068 | -0.34385 | -0.58191 |
| PNMAL1       | 0.001137 | 0.001322 | 1.96E-09 | 0.325631 | -0.35779 | -0.68342 |
| PODXL        | 1.38E-05 | 0.012232 | 4.95E-08 | 0.448653 | -0.33445 | -0.7831  |
| POLA1        | 0.000658 | 0.00159  | 7.22E-08 | 0.245006 | -0.26038 | -0.50538 |
| POLE2        | 0.039514 | 0.009067 | 4.88E-05 | 0.235917 | -0.33904 | -0.57496 |
| PON1         | 0.123413 | 2.27E-07 | 1.00E-09 | -0.10225 | 0.458018 | 0.560272 |
| POU2AF1      | 3.06E-07 | 7.10E-06 | 7.28E-11 | 0.495367 | -0.54497 | -1.04034 |
| PPA1         | 0.000259 | 3.78E-08 | 1.57E-11 | 0.194643 | -0.48219 | -0.67683 |
| PPAP2C       | 8.99E-06 | 0.000381 | 4.19E-10 | 0.545004 | -0.70422 | -1.24922 |
| PPAPDC1<br>A | 0.001215 | 7.28E-05 | 6.53E-09 | 0.378845 | -0.71357 | -1.09241 |
| PPBP         | 0.227098 | 0.011798 | 2.90E-05 | -0.16307 | 0.392941 | 0.556008 |
| PPDPF        | 0.600397 | 1.06E-05 | 2.14E-05 | 0.047584 | -0.47264 | -0.52023 |
| PPIH         | 0.003492 | 3.45E-08 | 9.01E-10 | 0.153879 | -0.3497  | -0.50358 |
| PPM1E        | 0.153348 | 1.47E-05 | 2.04E-08 | -0.16711 | 0.448564 | 0.615674 |
| PPM1M        | 1.33E-08 | 5.07E-05 | 9.12E-11 | 0.301317 | -0.2816  | -0.58292 |
| PPP1R12      | 1.13E-05 | 5.04E-06 | 6.68E-10 | 0.25327  | -0.25475 | -0.50802 |
| PPP1R14      | 0.105085 | 0.001043 | 2.77E-06 | 0.17273  | -0.41288 | -0.58561 |
| PPP1R16B     | 1.94E-06 | 4.06E-06 | 3.48E-11 | 0.329955 | -0.40995 | -0.7399  |
| PPP1R18      | 1.60E-07 | 2.49E-06 | 2.21E-11 | 0.374151 | -0.42219 | -0.79634 |
| PPP1R1A      | 0.000817 | 2.18E-09 | 2.78E-11 | -0.42719 | 1.485073 | 1.912259 |
| PPP1R3C      | 0.556426 | 8.73E-07 | 1.38E-06 | -0.05161 | 0.879218 | 0.930828 |
| PPP4R1       | 6.03E-07 | 3.78E-08 | 1.72E-11 | 0.285938 | -0.33285 | -0.61879 |
| PPT1         | 6.54E-09 | 8.26E-08 | 1.57E-11 | 0.46482  | -0.50843 | -0.97325 |
| PRC1         | 9.22E-05 | 4.31E-07 | 1.95E-11 | 0.664039 | -1.12114 | -1.78517 |
| PREX1        | 2.08E-08 | 2.31E-06 | 6.26E-11 | 0.37455  | -0.3647  | -0.73925 |
| PRF1         | 8.67E-06 | 0.000249 | 5.43E-09 | 0.301626 | -0.3626  | -0.66422 |
| PRG4         | 0.775528 | 3.79E-06 | 5.46E-05 | 0.078241 | 0.59602  | 0.517779 |
| PRKAR2B      | 6.55E-06 | 0.029892 | 5.97E-08 | 0.414654 | -0.16207 | -0.57672 |
| PRKCD        | 2.01E-05 | 0.000263 | 6.02E-09 | 0.300781 | -0.33559 | -0.63637 |
| PRKX         | 1.74E-09 | 5.39E-06 | 2.78E-11 | 0.461148 | -0.40463 | -0.86578 |
| PRKY         | 0.002837 | 0.011356 | 4.33E-07 | 0.249929 | -0.25743 | -0.50736 |
| PROCR        | 4.75E-06 | 0.001264 | 1.10E-10 | 0.468201 | -0.45192 | -0.92012 |
| PROM1        | 5.70E-05 | 0.00199  | 5.44E-08 | 0.665986 | -0.68923 | -1.35521 |
| PROX1        | 0.587238 | 6.85E-05 | 8.23E-06 | -0.03077 | 0.601243 | 0.632014 |
| PROZ         | 0.807852 | 0.018797 | 0.001644 | -0.05946 | 0.44624  | 0.505702 |
| PRR15L       | 0.003865 | 0.050673 | 7.60E-05 | 0.261335 | -0.33461 | -0.59595 |

|                |          |          |          |          |          |          |
|----------------|----------|----------|----------|----------|----------|----------|
| PRSS23         | 0.047564 | 2.46E-07 | 1.17E-09 | 0.119137 | -0.38908 | -0.50822 |
| PRTFDC1        | 0.001215 | 2.68E-06 | 1.21E-10 | 0.382068 | -0.62344 | -1.00551 |
| PSMB10         | 0.002498 | 1.21E-05 | 3.07E-10 | 0.264651 | -0.45599 | -0.72064 |
| PSMB8          | 0.004376 | 2.93E-05 | 4.67E-10 | 0.299353 | -0.528   | -0.82735 |
| PSMB9          | 3.39E-05 | 5.79E-06 | 5.17E-11 | 0.531068 | -0.79981 | -1.33087 |
| PSMD14         | 0.030526 | 4.02E-09 | 4.97E-11 | 0.128404 | -0.402   | -0.53041 |
| PSME2          | 0.003419 | 9.27E-06 | 1.72E-10 | 0.188252 | -0.3696  | -0.55785 |
| PSTPIP1        | 6.25E-05 | 1.21E-05 | 4.97E-11 | 0.315709 | -0.39763 | -0.71334 |
| PSTPIP2        | 0.000625 | 0.019452 | 9.67E-08 | 0.332918 | -0.24783 | -0.58075 |
| PTGDS          | 3.36E-06 | 0.000575 | 2.19E-10 | 0.786044 | -0.78315 | -1.56919 |
| PTGER2         | 0.000422 | 0.021535 | 3.03E-08 | 0.312639 | -0.30822 | -0.62086 |
| PTGER4         | 5.60E-07 | 1.38E-05 | 4.97E-11 | 0.404619 | -0.38134 | -0.78595 |
| PTGFRN         | 5.23E-05 | 0.000136 | 1.96E-09 | 0.309883 | -0.37105 | -0.68093 |
| PTPN22         | 1.94E-07 | 3.29E-06 | 2.49E-11 | 0.24911  | -0.33896 | -0.58807 |
| PTPRC          | 5.36E-08 | 5.07E-05 | 3.07E-11 | 0.522913 | -0.4388  | -0.96172 |
| PTPRCAP        | 4.33E-05 | 2.89E-07 | 3.59E-11 | 0.303821 | -0.50337 | -0.80719 |
| PTTG1          | 0.000311 | 4.53E-08 | 8.29E-11 | 0.413488 | -0.87558 | -1.28906 |
| PVRIG          | 4.82E-07 | 2.15E-08 | 1.77E-11 | 0.464671 | -0.68573 | -1.1504  |
| PXDN           | 0.000208 | 3.79E-06 | 2.79E-10 | 0.303446 | -0.37066 | -0.67411 |
| PXMP2          | 5.70E-05 | 1.08E-08 | 5.42E-11 | -0.20773 | 0.423153 | 0.630882 |
| PYCARD         | 9.13E-08 | 2.16E-11 | 1.57E-11 | 0.419916 | -0.65777 | -1.07769 |
| PYHIN1         | 2.09E-07 | 0.001205 | 3.07E-10 | 0.477812 | -0.38755 | -0.86536 |
| PZP            | 0.411112 | 0.0009   | 0.002255 | 0.283964 | 1.406878 | 1.122913 |
| QPCT           | 0.000159 | 7.59E-08 | 2.31E-11 | 0.339086 | -0.75057 | -1.08965 |
| RAB11B-<br>AS1 | 0.111029 | 0.000136 | 4.53E-07 | -0.16643 | 0.385801 | 0.55223  |
| RAB25          | 0.050444 | 1.56E-05 | 7.70E-10 | 0.461479 | -1.49453 | -1.95601 |
| RAB31          | 3.61E-09 | 7.37E-10 | 1.57E-11 | 0.467593 | -0.51428 | -0.98187 |
| RAB32          | 0.053563 | 4.06E-06 | 4.45E-09 | 0.107308 | -0.44325 | -0.55056 |
| RAB34          | 7.54E-08 | 3.77E-11 | 1.57E-11 | 0.434585 | -0.69464 | -1.12923 |
| RAB38          | 0.011667 | 1.47E-05 | 5.16E-10 | 0.2201   | -0.53999 | -0.76009 |
| RAB8B          | 1.33E-08 | 3.07E-06 | 1.91E-11 | 0.387493 | -0.38861 | -0.7761  |
| RAC2           | 1.45E-06 | 1.02E-06 | 3.59E-11 | 0.369094 | -0.55699 | -0.92608 |
| RACGAP1        | 2.43E-07 | 2.31E-06 | 3.91E-11 | 0.59393  | -0.75896 | -1.35289 |
| RAD51AP<br>1   | 3.44E-07 | 1.10E-06 | 1.77E-11 | 0.514997 | -0.83172 | -1.34672 |
| RAI2           | 0.042642 | 0.006897 | 7.29E-06 | 0.197679 | -0.30423 | -0.50191 |
| RALGDS         | 5.37E-05 | 1.62E-07 | 4.19E-10 | 0.22433  | -0.32271 | -0.54704 |
| RAMP1          | 0.209969 | 0.001322 | 3.76E-05 | -0.10818 | 0.454598 | 0.56278  |
| RANBP3L        | 0.477079 | 1.01E-09 | 5.43E-09 | -0.06827 | 0.47519  | 0.543458 |
| RAPH1          | 0.793757 | 9.69E-05 | 0.000149 | 0.052679 | 0.523126 | 0.470447 |
| RARRES1        | 6.70E-08 | 4.02E-09 | 1.57E-11 | 0.649265 | -1.01172 | -1.66098 |
| RARRES3        | 0.068961 | 0.001816 | 3.77E-07 | 0.202885 | -0.4722  | -0.67509 |
| RASGEF1<br>A   | 1.38E-07 | 0.000189 | 3.73E-11 | 0.293209 | -0.2243  | -0.51751 |
| RASGRP1        | 3.61E-09 | 1.77E-07 | 1.57E-11 | 0.9981   | -0.86037 | -1.85847 |
| RASSF2         | 6.52E-09 | 2.68E-06 | 2.58E-11 | 0.59764  | -0.4457  | -1.04334 |
| RASSF3         | 3.58E-06 | 7.37E-10 | 1.72E-11 | 0.452238 | -0.6046  | -1.05684 |
| RBBP8          | 0.001531 | 8.76E-12 | 1.58E-11 | 0.221503 | -0.56739 | -0.78889 |
| RBM3           | 0.000164 | 9.89E-06 | 2.66E-10 | 0.308782 | -0.34562 | -0.6544  |
| RBP5           | 0.001758 | 2.39E-09 | 5.17E-11 | -0.23315 | 0.580955 | 0.814104 |
| RCAN2          | 1.74E-06 | 0.001901 | 4.03E-09 | 0.859242 | -0.60673 | -1.46598 |
| RCAN3          | 2.01E-05 | 3.66E-07 | 2.43E-11 | 0.234601 | -0.3822  | -0.6168  |
| RCC2           | 6.71E-07 | 4.98E-11 | 2.31E-11 | 0.282899 | -0.46796 | -0.75086 |
| RCL1           | 0.002896 | 2.68E-06 | 1.23E-09 | -0.25838 | 0.352518 | 0.610901 |
| RCN2           | 0.002778 | 3.93E-10 | 2.31E-11 | 0.1691   | -0.41403 | -0.58313 |
| RCSD1          | 2.08E-08 | 7.10E-06 | 4.10E-11 | 0.526237 | -0.51026 | -1.0365  |
| RDH12          | 0.175754 | 0.014722 | 3.37E-05 | 0.230198 | -0.49648 | -0.72668 |

|                   |          |          |          |          |          |          |
|-------------------|----------|----------|----------|----------|----------|----------|
| RDH16             | 0.131933 | 3.39E-07 | 3.68E-08 | -0.10728 | 0.521173 | 0.628449 |
| RECQL             | 2.28E-05 | 7.59E-08 | 2.21E-11 | 0.322529 | -0.39131 | -0.71384 |
| RELB              | 0.003289 | 0.000575 | 9.21E-08 | 0.235466 | -0.38555 | -0.62101 |
| RERG              | 9.91E-06 | 0.037344 | 5.20E-08 | 0.343371 | -0.28431 | -0.62768 |
| RFC4              | 8.94E-05 | 1.33E-08 | 2.68E-11 | 0.308113 | -0.59737 | -0.90548 |
| RFX5              | 9.13E-08 | 2.34E-11 | 1.57E-11 | 0.338029 | -0.56291 | -0.90094 |
| RGCC              | 1.99E-08 | 3.53E-06 | 5.42E-11 | 0.431283 | -0.43314 | -0.86442 |
| RGL1              | 2.74E-06 | 0.000495 | 6.01E-10 | 0.314734 | -0.19524 | -0.50998 |
| RGS1              | 9.79E-08 | 1.93E-07 | 1.34E-10 | 0.376661 | -0.49665 | -0.87331 |
| RGS10             | 3.61E-09 | 3.24E-09 | 1.57E-11 | 0.336961 | -0.44973 | -0.78669 |
| RGS18             | 6.64E-05 | 0.00199  | 1.17E-08 | 0.478207 | -0.46706 | -0.94527 |
| RGS19             | 8.94E-05 | 1.37E-07 | 1.34E-10 | 0.27138  | -0.42358 | -0.69496 |
| RGS2              | 0.003289 | 0.014722 | 6.22E-07 | 0.282257 | -0.26442 | -0.54667 |
| RGS4              | 0.004466 | 1.56E-05 | 9.01E-10 | 0.179976 | -0.54812 | -0.7281  |
| RHBDF2            | 2.31E-06 | 8.10E-06 | 2.78E-11 | 0.331581 | -0.35717 | -0.68875 |
| RHNO1             | 2.87E-08 | 4.45E-10 | 1.57E-11 | 0.386078 | -0.61173 | -0.99781 |
| RHOBTB1           | 8.40E-06 | 9.69E-05 | 2.43E-10 | 0.519388 | -0.54692 | -1.06631 |
| RHOG              | 2.65E-05 | 4.06E-06 | 4.19E-10 | 0.258134 | -0.31236 | -0.5705  |
| RHOH              | 0.00047  | 1.60E-06 | 2.31E-10 | 0.219681 | -0.44414 | -0.66382 |
| RHOQ              | 4.36E-08 | 6.70E-10 | 1.57E-11 | 0.264955 | -0.38497 | -0.64992 |
| RIPK2             | 5.28E-06 | 2.89E-07 | 3.59E-11 | 0.199023 | -0.30675 | -0.50577 |
| RMI2              | 0.000674 | 3.39E-07 | 3.36E-11 | 0.300402 | -0.66471 | -0.96511 |
| RNASE2            | 0.126878 | 7.48E-07 | 9.01E-10 | 0.109996 | -0.5005  | -0.6105  |
| RNASE6            | 2.49E-08 | 5.36E-08 | 1.57E-11 | 0.697291 | -0.69466 | -1.39195 |
| RNASEH2<br>A      | 1.21E-05 | 1.69E-05 | 3.97E-10 | 0.344616 | -0.46682 | -0.81143 |
| RND2              | 0.001682 | 0.00199  | 1.23E-07 | -0.27414 | 0.291099 | 0.565234 |
| RND3              | 0.144149 | 9.89E-06 | 7.94E-08 | 0.153551 | -0.46237 | -0.61592 |
| RNF103-<br>CHMP3  | 4.48E-05 | 2.39E-09 | 2.78E-11 | 0.198818 | -0.34844 | -0.54726 |
| RNF135            | 1.46E-05 | 5.39E-06 | 8.66E-11 | 0.314035 | -0.33759 | -0.65163 |
| RNF166            | 6.90E-07 | 0.022279 | 2.54E-09 | 0.429244 | -0.20654 | -0.63578 |
| ROBO1             | 2.16E-07 | 7.10E-06 | 1.77E-11 | 0.503542 | -0.55211 | -1.05565 |
| RORC              | 0.126878 | 5.72E-11 | 5.92E-11 | -0.08406 | 0.566128 | 0.650191 |
| RP1-<br>151F17.2  | 0.016372 | 7.59E-08 | 1.29E-08 | -0.12634 | 0.475941 | 0.602281 |
| RP1-<br>193H18.2  | 0.232476 | 0.012702 | 0.000657 | -0.14408 | 0.398756 | 0.542834 |
| RP1-<br>93H18.6   | 0.001925 | 0.003104 | 8.62E-09 | 0.475371 | -0.61736 | -1.09273 |
| RP11-<br>11N9.4   | 0.003419 | 7.59E-08 | 1.99E-10 | 0.285724 | -0.82921 | -1.11493 |
| RP11-<br>250B2.6  | 0.509837 | 2.00E-06 | 1.11E-06 | -0.03528 | 0.561829 | 0.597113 |
| RP11-<br>327J17.2 | 0.073191 | 2.15E-05 | 1.48E-07 | -0.15256 | 0.614998 | 0.767558 |
| RP11-<br>355B11.2 | 0.307401 | 2.15E-08 | 1.27E-08 | -0.08418 | 0.617357 | 0.701541 |
| RP11-<br>384L8.1  | 0.159189 | 9.20E-10 | 5.62E-11 | -0.12856 | 0.670508 | 0.799065 |
| RP11-<br>389C8.2  | 8.72E-05 | 0.025499 | 7.59E-08 | 0.335928 | -0.18562 | -0.52155 |
| RP11-<br>38P22.2  | 1.95E-05 | 1.38E-05 | 8.66E-11 | 0.316267 | -0.45707 | -0.77333 |
| RP11-<br>401P9.4  | 0.001603 | 0.001733 | 8.19E-09 | 0.277551 | -0.33256 | -0.61011 |
| RP11-<br>456H18.2 | 9.49E-05 | 0.000324 | 4.45E-09 | -0.26046 | 0.242545 | 0.503    |

|                |          |          |          |          |          |          |
|----------------|----------|----------|----------|----------|----------|----------|
| RP11-458D21.1  | 0.053563 | 0.001737 | 1.50E-05 | -0.21018 | 0.42839  | 0.638568 |
| RP11-486G15.2  | 0.224626 | 4.06E-06 | 2.05E-07 | -0.09961 | 0.47912  | 0.578729 |
| RP11-488L18.10 | 0.000481 | 0.081861 | 8.90E-07 | 0.429125 | -0.21596 | -0.64509 |
| RP11-635N19.1  | 0.006643 | 1.10E-06 | 1.06E-10 | -0.28459 | 0.538404 | 0.822997 |
| RP11-642D21.1  | 0.001391 | 0.43409  | 0.000101 | 0.344541 | -0.19225 | -0.5368  |
| RP11-686D22.8  | 9.49E-05 | 1.61E-08 | 5.92E-11 | 0.292382 | -0.49398 | -0.78636 |
| RP11-740C1.2   | 0.26255  | 1.21E-05 | 1.06E-08 | -0.18102 | 0.675831 | 0.856849 |
| RP11-747H7.3   | 8.67E-06 | 7.74E-05 | 3.07E-10 | 0.348108 | -0.37047 | -0.71858 |
| RP11-863K10.7  | 0.000547 | 2.87E-06 | 2.08E-10 | -0.18882 | 0.329118 | 0.517936 |
| RP11-96D1.11   | 0.067962 | 8.26E-08 | 2.95E-09 | -0.08471 | 0.447144 | 0.531857 |
| RP3-406A7.7    | 0.031057 | 7.10E-06 | 1.78E-07 | -0.12138 | 0.384456 | 0.505836 |
| RP4-680D5.8    | 0.173653 | 1.12E-09 | 1.41E-07 | -0.03895 | 0.65983  | 0.698779 |
| RP4-791M13.3   | 0.053563 | 0.001737 | 1.50E-05 | -0.21018 | 0.42839  | 0.638568 |
| RP5-1154L15.2  | 0.811944 | 0.001205 | 0.000436 | 0.033695 | -0.50505 | -0.53874 |
| RPL22L1        | 0.028997 | 1.26E-09 | 8.29E-11 | 0.174344 | -0.81843 | -0.99278 |
| RPL39L         | 0.029978 | 2.84E-08 | 1.48E-10 | 0.174135 | -0.5226  | -0.69674 |
| RPS6KA1        | 0.000281 | 0.000109 | 2.18E-09 | 0.318568 | -0.34301 | -0.66158 |
| RRAS           | 0.016925 | 0.000211 | 4.67E-09 | 0.193652 | -0.33298 | -0.52663 |
| RRM2           | 3.04E-06 | 4.67E-07 | 2.04E-11 | 1.088212 | -1.49086 | -2.57907 |
| RRM2B          | 1.40E-06 | 0.05377  | 6.68E-09 | 0.395079 | -0.17824 | -0.57332 |
| RSAD2          | 0.000188 | 0.496563 | 2.49E-05 | 0.537375 | -0.28332 | -0.8207  |
| RTN1           | 8.61E-09 | 9.17E-05 | 2.49E-11 | 0.616365 | -0.54225 | -1.15861 |
| RTP4           | 9.97E-07 | 5.39E-06 | 1.79E-10 | 0.454333 | -0.54875 | -1.00309 |
| RUNX1-IT1      | 0.000274 | 0.012232 | 2.47E-07 | 0.289814 | -0.23459 | -0.52441 |
| RUNX3          | 1.73E-07 | 1.56E-05 | 4.29E-11 | 0.326596 | -0.31621 | -0.64281 |
| RXRA           | 0.021277 | 1.61E-08 | 3.97E-10 | -0.11833 | 0.394266 | 0.512593 |
| S100A11        | 1.63E-09 | 2.98E-12 | 1.57E-11 | 0.622241 | -0.79618 | -1.41842 |
| S100A11P1      | 1.30E-06 | 8.31E-10 | 2.21E-11 | 0.346747 | -0.59373 | -0.94048 |
| S100A14        | 0.10091  | 0.173471 | 0.001462 | 0.191666 | -0.34394 | -0.5356  |
| S100A4         | 6.54E-09 | 5.36E-08 | 2.38E-11 | 0.709702 | -0.64107 | -1.35078 |
| S100A6         | 6.71E-07 | 7.48E-07 | 2.87E-11 | 0.342556 | -0.44381 | -0.78637 |
| S100A8         | 0.50179  | 6.09E-05 | 2.68E-05 | 0.10774  | -0.42559 | -0.53333 |
| S100A9         | 0.169737 | 4.49E-05 | 3.15E-06 | 0.109087 | -0.5481  | -0.65719 |
| SACS           | 4.44E-06 | 2.89E-07 | 2.43E-11 | 0.393643 | -0.57127 | -0.96491 |
| SAMD11         | 0.010441 | 2.03E-05 | 3.48E-11 | 0.284482 | -0.56809 | -0.85257 |
| SAMD9          | 2.62E-07 | 7.57E-06 | 9.63E-11 | 0.486686 | -0.52339 | -1.01008 |
| SAMD9L         | 1.34E-05 | 2.93E-05 | 2.43E-10 | 0.411702 | -0.56333 | -0.97503 |
| SAMHD1         | 4.27E-08 | 0.000171 | 2.43E-11 | 0.440054 | -0.37729 | -0.81734 |
| SAMSN1         | 3.45E-08 | 1.38E-06 | 2.58E-11 | 0.40567  | -0.48265 | -0.88832 |
| SASH3          | 2.02E-08 | 4.16E-08 | 1.77E-11 | 0.541373 | -0.65765 | -1.19903 |
| SAT2           | 0.018194 | 1.95E-09 | 1.95E-11 | -0.14043 | 0.405376 | 0.545803 |
| SC5D           | 0.175754 | 1.60E-06 | 9.21E-08 | -0.09253 | 0.459854 | 0.552388 |

|              |          |          |          |          |          |          |
|--------------|----------|----------|----------|----------|----------|----------|
| SCARA5       | 0.065076 | 7.10E-06 | 0.000436 | 0.16153  | 0.510619 | 0.349089 |
| SCD          | 0.698268 | 0.000115 | 3.63E-05 | 0.05624  | -0.56184 | -0.61808 |
| SCG5         | 0.04899  | 5.39E-05 | 2.61E-08 | -0.26115 | 0.68451  | 0.945656 |
| SCGN         | 0.371309 | 0.006623 | 0.000202 | 0.117151 | -0.55471 | -0.67186 |
| SCRN1        | 2.43E-07 | 6.97E-07 | 2.13E-11 | 0.417517 | -0.61437 | -1.03188 |
| SDC2         | 0.024383 | 1.73E-10 | 1.01E-10 | -0.11386 | 0.439372 | 0.553235 |
| SDCBP2       | 0.522219 | 0.001205 | 2.79E-05 | 0.114173 | -0.80724 | -0.92141 |
| SECTM1       | 2.48E-06 | 0.000667 | 1.27E-10 | 0.355577 | -0.31282 | -0.6684  |
| SEL1L3       | 5.12E-10 | 8.76E-12 | 1.57E-11 | 0.37233  | -0.51687 | -0.8892  |
| SELENBP1     | 0.022024 | 2.03E-05 | 4.23E-09 | -0.14554 | 0.366071 | 0.511614 |
| SELL         | 1.90E-09 | 0.000171 | 5.42E-11 | 0.707811 | -0.61    | -1.31781 |
| SELM         | 7.18E-07 | 9.20E-10 | 1.57E-11 | 0.561655 | -0.8761  | -1.43775 |
| SEMA3C       | 0.001758 | 1.78E-05 | 1.15E-10 | 0.249697 | -0.45465 | -0.70434 |
| SEMA4D       | 8.61E-09 | 4.67E-07 | 1.64E-11 | 0.479707 | -0.39946 | -0.87917 |
| 6-Sep        | 3.69E-06 | 1.90E-05 | 7.70E-10 | 0.345566 | -0.25045 | -0.59601 |
| SERPINA5     | 0.002107 | 3.93E-10 | 7.95E-11 | -0.11908 | 0.457033 | 0.57611  |
| SERPINB1     | 1.19E-07 | 1.08E-08 | 2.87E-11 | 0.300519 | -0.37095 | -0.67147 |
| SERPINB8     | 0.019115 | 3.83E-12 | 1.70E-11 | 0.140102 | -0.55092 | -0.69102 |
| SERPINB9     | 1.80E-06 | 6.37E-08 | 1.15E-10 | 0.313065 | -0.3645  | -0.67757 |
| SERPINE2     | 1.07E-06 | 5.04E-06 | 1.06E-10 | 0.273499 | -0.43541 | -0.70891 |
| SERPINF2     | 0.010626 | 1.16E-10 | 2.87E-11 | -0.12395 | 0.465154 | 0.589107 |
| SERPINH1     | 0.023164 | 4.37E-06 | 1.58E-08 | 0.17593  | -0.43265 | -0.60858 |
| SFRP5        | 0.049705 | 0.007761 | 4.53E-05 | 0.195177 | -0.38248 | -0.57766 |
| SFXN3        | 3.45E-08 | 4.06E-06 | 1.85E-11 | 0.285179 | -0.24748 | -0.53265 |
| SGCB         | 0.013515 | 0.000324 | 8.79E-08 | 0.186583 | -0.35296 | -0.53954 |
| SGK1         | 0.001603 | 0.000667 | 7.00E-10 | 0.335934 | -0.38222 | -0.71815 |
| SGK223       | 0.000208 | 5.86E-08 | 3.73E-11 | 0.291491 | -0.58515 | -0.87664 |
| SGOL2        | 0.000193 | 1.86E-06 | 3.40E-10 | 0.25491  | -0.53919 | -0.7941  |
| SH3BGRL      | 8.95E-09 | 4.35E-12 | 1.57E-11 | 0.355378 | -0.52768 | -0.88306 |
| SH3BGRL<br>3 | 0.000198 | 2.09E-07 | 7.00E-10 | 0.283053 | -0.48164 | -0.76469 |
| SHCBP1       | 0.063194 | 6.74E-09 | 3.40E-10 | 0.093593 | -0.62978 | -0.72337 |
| SHD          | 0.006779 | 4.22E-05 | 3.11E-09 | -0.19809 | 0.355022 | 0.553109 |
| SHF          | 0.460806 | 5.51E-07 | 1.55E-08 | -0.08854 | 0.567896 | 0.65644  |
| SIDT1        | 9.91E-06 | 9.27E-06 | 3.58E-10 | 0.345051 | -0.46117 | -0.80622 |
| SIGIRR       | 0.012768 | 8.67E-05 | 1.58E-08 | -0.243   | 0.472771 | 0.715774 |
| SIGLEC1      | 3.48E-06 | 0.006897 | 1.58E-08 | 0.388654 | -0.31273 | -0.70138 |
| SIGLEC10     | 0.011462 | 3.07E-06 | 2.66E-10 | 0.177682 | -0.51031 | -0.68799 |
| SIRPG        | 0.000674 | 5.79E-06 | 2.92E-10 | 0.197188 | -0.37621 | -0.5734  |
| SKA2         | 4.92E-06 | 4.22E-05 | 7.37E-10 | 0.330985 | -0.34219 | -0.67317 |
| SKAP1        | 0.007606 | 0.001205 | 1.41E-07 | -0.23999 | 0.359921 | 0.599907 |
| SKIDA1       | 0.464651 | 5.44E-09 | 4.67E-09 | -0.04325 | 0.518806 | 0.562054 |
| SLA          | 1.15E-08 | 6.37E-08 | 1.57E-11 | 0.481307 | -0.56931 | -1.05062 |
| SLAMF6       | 0.118714 | 7.10E-06 | 2.61E-08 | 0.106346 | -0.41963 | -0.52598 |
| SLAMF7       | 5.98E-08 | 5.04E-06 | 2.58E-11 | 0.511934 | -0.72864 | -1.24057 |
| SLAMF8       | 3.61E-09 | 1.95E-09 | 1.57E-11 | 0.623837 | -1.00506 | -1.6289  |
| SLC12A2      | 8.43E-08 | 4.91E-08 | 1.69E-11 | 0.641089 | -0.98586 | -1.62695 |
| SLC13A5      | 0.055177 | 7.59E-08 | 3.58E-10 | -0.1678  | 0.715872 | 0.883675 |
| SLC15A3      | 1.83E-05 | 3.74E-05 | 4.67E-10 | 0.365687 | -0.43961 | -0.80529 |
| SLC16A10     | 0.003492 | 9.93E-09 | 1.10E-10 | -0.28158 | 1.061708 | 1.343289 |
| SLC16A7      | 7.73E-05 | 0.378944 | 2.66E-06 | 0.448211 | -0.12021 | -0.56843 |
| SLC17A2      | 0.001682 | 2.48E-10 | 1.95E-11 | -0.18627 | 0.628094 | 0.814367 |
| SLC18B1      | 7.54E-06 | 4.70E-06 | 3.36E-11 | 0.388033 | -0.41022 | -0.79825 |
| SLC19A2      | 0.051263 | 1.16E-07 | 9.52E-09 | -0.14634 | 0.637858 | 0.784194 |
| SLC22A1      | 0.005041 | 7.37E-10 | 5.62E-11 | -0.15214 | 0.598859 | 0.750996 |
| SLC22A15     | 0.051263 | 4.22E-05 | 2.98E-07 | 0.154187 | -0.85364 | -1.00782 |
| SLC22A25     | 0.095582 | 0.000211 | 5.94E-07 | -0.1187  | 0.383917 | 0.50262  |
| SLC25A33     | 0.131933 | 0.000211 | 3.15E-06 | 0.152916 | -0.49597 | -0.64889 |

|               |          |          |          |          |          |          |
|---------------|----------|----------|----------|----------|----------|----------|
| SLC26A2       | 3.39E-05 | 1.01E-09 | 1.72E-11 | 0.240949 | -0.43783 | -0.67878 |
| SLC27A5       | 0.000367 | 3.24E-09 | 4.72E-11 | -0.17287 | 0.401865 | 0.574737 |
| SLC28A3       | 0.021653 | 0.000947 | 3.95E-07 | 0.150414 | -0.38154 | -0.53195 |
| SLC29A3       | 0.00069  | 3.29E-06 | 1.36E-09 | 0.234098 | -0.35522 | -0.58932 |
| SLC2A3        | 6.44E-05 | 3.14E-07 | 3.91E-11 | 0.201217 | -0.30446 | -0.50568 |
| SLC2A6        | 0.000367 | 1.13E-05 | 1.15E-10 | 0.242682 | -0.37003 | -0.61271 |
| SLC35G1       | 0.001326 | 2.43E-05 | 4.23E-09 | 0.217732 | -0.42412 | -0.64185 |
| SLC37A4       | 0.002778 | 1.95E-09 | 4.67E-10 | -0.1761  | 0.371951 | 0.548051 |
| SLC38A1       | 5.37E-05 | 2.81E-10 | 3.59E-11 | 0.262961 | -0.56264 | -0.8256  |
| SLC38A4       | 0.062274 | 4.70E-06 | 1.94E-08 | -0.14523 | 0.51371  | 0.658944 |
| SLC38A6       | 9.25E-06 | 6.99E-06 | 5.17E-11 | 0.41832  | -0.55296 | -0.97128 |
| SLC39A10      | 1.60E-07 | 1.28E-06 | 1.82E-11 | 0.514737 | -0.43957 | -0.95431 |
| SLC39A5       | 0.007606 | 4.91E-08 | 3.23E-10 | -0.16701 | 0.391458 | 0.558469 |
| SLC44A2       | 9.49E-05 | 0.000121 | 6.68E-10 | 0.265951 | -0.25077 | -0.51672 |
| SLC44A3       | 0.001494 | 2.58E-05 | 6.01E-10 | 0.593262 | -0.86008 | -1.45335 |
| SLC45A3       | 0.392802 | 2.91E-09 | 6.34E-10 | -0.06357 | 0.487977 | 0.551547 |
| SLC45A4       | 1.38E-07 | 3.24E-09 | 1.60E-11 | 0.253219 | -0.39345 | -0.64667 |
| SLC47A1       | 0.000392 | 1.01E-09 | 2.66E-10 | -0.20889 | 0.596584 | 0.805476 |
| SLC51A        | 0.009337 | 2.15E-05 | 2.42E-09 | 0.347838 | -0.50225 | -0.85009 |
| SLC51B        | 0.064163 | 1.06E-10 | 3.59E-11 | 0.24771  | -1.73836 | -1.98607 |
| SLC6A1        | 0.126878 | 6.10E-10 | 1.78E-09 | -0.04995 | 0.671058 | 0.721011 |
| SLC6A13       | 0.016136 | 3.24E-09 | 1.06E-10 | -0.11029 | 0.451382 | 0.561669 |
| SLC6A16       | 0.350312 | 1.97E-08 | 5.44E-08 | -0.06625 | 0.688769 | 0.755018 |
| SLC7A6        | 1.38E-05 | 7.36E-09 | 1.69E-11 | 0.183063 | -0.39183 | -0.57489 |
| SLC7A7        | 1.03E-08 | 1.38E-05 | 2.49E-11 | 0.518882 | -0.50126 | -1.02014 |
| SLC9B2        | 0.000338 | 8.07E-07 | 2.92E-10 | -0.20662 | 0.395476 | 0.602099 |
| SLCO1B1       | 0.133573 | 1.51E-10 | 6.34E-09 | -0.05687 | 0.472866 | 0.529737 |
| SLFN11        | 2.87E-08 | 2.84E-08 | 1.77E-11 | 0.506517 | -0.54545 | -1.05197 |
| SLFN12        | 1.05E-08 | 6.82E-12 | 1.57E-11 | 0.42673  | -1.00625 | -1.43298 |
| SLFN13        | 0.000117 | 2.31E-06 | 6.94E-11 | 0.239761 | -0.49308 | -0.73284 |
| SLFN5         | 4.75E-05 | 0.000858 | 1.41E-10 | 0.264459 | -0.31261 | -0.57707 |
| SLIT2         | 0.000203 | 9.17E-05 | 1.00E-09 | 0.243353 | -0.40962 | -0.65298 |
| SLITRK3       | 0.014018 | 0.008722 | 4.33E-07 | -0.29469 | 0.350886 | 0.645575 |
| SMAD9         | 0.038373 | 0.000144 | 4.67E-09 | 0.134291 | -0.38478 | -0.51908 |
| SMARCA        | 1.40E-06 | 6.37E-08 | 2.78E-11 | 0.303709 | -0.39005 | -0.69376 |
| SMC2          | 1.87E-06 | 4.49E-05 | 1.06E-10 | 0.359565 | -0.33777 | -0.69733 |
| SMC4          | 0.001215 | 3.53E-05 | 7.01E-09 | 0.195771 | -0.32373 | -0.5195  |
| SMIM1         | 0.050444 | 1.90E-05 | 1.85E-08 | -0.17321 | 0.357904 | 0.531118 |
| SMIM14        | 0.403595 | 3.66E-07 | 1.23E-07 | -0.03883 | 0.540748 | 0.579583 |
| SMIM2-<br>AS1 | 0.065076 | 0.012232 | 1.71E-06 | -0.22195 | 0.338475 | 0.560426 |
| SMIM3         | 1.42E-05 | 0.000249 | 2.08E-10 | 0.423016 | -0.37664 | -0.79966 |
| SMOC1         | 0.157227 | 5.44E-09 | 1.68E-09 | -0.07415 | 0.523436 | 0.597582 |
| SMOC2         | 0.014018 | 0.0002   | 2.95E-09 | 0.276807 | -0.5837  | -0.86051 |
| SMPX          | 0.333286 | 0.050673 | 0.000188 | 0.257028 | -0.39382 | -0.65085 |
| SMS           | 0.005147 | 5.36E-08 | 3.58E-10 | 0.176474 | -0.33481 | -0.51128 |
| SNAP25        | 0.040115 | 0.000115 | 1.02E-07 | 0.148053 | -0.42273 | -0.57078 |
| SNHG12        | 0.000198 | 2.15E-08 | 2.96E-11 | 0.220354 | -0.4261  | -0.64645 |
| SNN           | 1.10E-05 | 3.53E-06 | 9.01E-10 | 0.23362  | -0.3207  | -0.55432 |
| SNORA16<br>A  | 0.000198 | 2.15E-08 | 2.96E-11 | 0.220354 | -0.4261  | -0.64645 |
| SNORA44       | 0.000198 | 2.15E-08 | 2.96E-11 | 0.220354 | -0.4261  | -0.64645 |
| SNORA61       | 0.000198 | 2.15E-08 | 2.96E-11 | 0.220354 | -0.4261  | -0.64645 |
| SNX7          | 0.022764 | 3.79E-06 | 1.29E-09 | 0.179372 | -0.35734 | -0.53672 |
| SORD          | 0.059617 | 1.95E-09 | 2.92E-10 | -0.0926  | 0.612    | 0.704597 |
| SORL1         | 0.034291 | 2.48E-10 | 9.01E-10 | -0.17285 | 0.586246 | 0.759095 |
| SORT1         | 0.112549 | 2.58E-05 | 1.21E-06 | 0.079282 | -0.47365 | -0.55293 |
| SOWAHC        | 0.073191 | 5.04E-06 | 2.95E-09 | -0.12144 | 0.403395 | 0.52484  |

|                 |          |          |          |          |          |          |
|-----------------|----------|----------|----------|----------|----------|----------|
| SOX4            | 6.78E-06 | 5.86E-08 | 1.91E-11 | 0.29363  | -0.49335 | -0.78698 |
| SOX9            | 3.58E-06 | 4.16E-08 | 2.58E-11 | 0.901472 | -1.38103 | -2.2825  |
| SP110           | 1.74E-06 | 0.000635 | 5.16E-10 | 0.306962 | -0.28204 | -0.589   |
| SP140           | 3.67E-07 | 5.73E-05 | 1.29E-09 | 0.369761 | -0.45881 | -0.82857 |
| SPA17           | 0.002605 | 9.09E-09 | 7.95E-11 | 0.244011 | -0.69145 | -0.93546 |
| SPAG1           | 0.03264  | 0.000103 | 2.14E-08 | 0.308446 | -0.43225 | -0.7407  |
| SPARC           | 9.49E-05 | 1.47E-05 | 1.51E-09 | 0.306185 | -0.44138 | -0.74757 |
| SPATS2          | 3.97E-07 | 6.97E-07 | 2.78E-11 | 0.244634 | -0.36796 | -0.61259 |
| SPC25           | 0.002723 | 5.39E-05 | 9.01E-10 | 0.260295 | -0.62433 | -0.88462 |
| SPDL1           | 6.06E-05 | 0.000211 | 5.72E-10 | 0.269491 | -0.34378 | -0.61327 |
| SPIN4           | 1.03E-05 | 0.000263 | 9.01E-10 | 0.444548 | -0.37226 | -0.81681 |
| SPINK1          | 0.042642 | 0.125799 | 0.000164 | 0.292363 | -0.49823 | -0.7906  |
| SPINT2          | 5.28E-06 | 5.97E-07 | 4.29E-11 | 0.482614 | -0.89069 | -1.37331 |
| SPON1           | 0.006384 | 8.17E-05 | 1.43E-09 | 0.187465 | -0.41247 | -0.59993 |
| SPON2           | 1.73E-05 | 7.59E-08 | 3.48E-11 | 0.409567 | -0.64897 | -1.05854 |
| SPP1            | 8.94E-05 | 2.68E-06 | 7.28E-11 | 0.637113 | -0.87755 | -1.51466 |
| SPSB1           | 0.020512 | 3.33E-05 | 3.52E-08 | 0.212385 | -0.41025 | -0.62263 |
| SPTSSA          | 0.028512 | 0.055229 | 5.94E-06 | 0.274138 | -0.24376 | -0.51789 |
| SRD5A1          | 0.145789 | 5.39E-06 | 7.11E-07 | -0.08793 | 0.489247 | 0.577181 |
| SRD5A2          | 0.017877 | 2.91E-09 | 1.06E-10 | -0.36686 | 1.424293 | 1.791158 |
| SRGN            | 1.55E-06 | 3.66E-07 | 2.13E-11 | 0.352218 | -0.47152 | -0.82373 |
| SRPX            | 0.000726 | 0.000293 | 3.45E-09 | 0.435911 | -0.58391 | -1.01982 |
| SRXN1           | 0.004939 | 3.66E-07 | 1.06E-10 | 0.173805 | -0.42991 | -0.60371 |
| SS18L1          | 0.046156 | 6.37E-08 | 4.23E-09 | -0.10851 | 0.465356 | 0.573866 |
| SSPN            | 0.000726 | 0.0009   | 5.16E-10 | 0.276395 | -0.32061 | -0.59701 |
| ST3GAL1         | 0.03264  | 4.06E-06 | 5.97E-08 | -0.15893 | 0.389215 | 0.548141 |
| ST3GAL6         | 0.019802 | 2.09E-07 | 1.59E-09 | -0.13561 | 0.413333 | 0.548941 |
| ST8SIA4         | 3.60E-08 | 8.71E-06 | 2.31E-11 | 0.399775 | -0.43561 | -0.83538 |
| STAMBPL<br>1    | 5.46E-06 | 6.28E-11 | 1.69E-11 | 0.202104 | -0.38933 | -0.59144 |
| STARD3N<br>L    | 2.94E-07 | 2.59E-08 | 2.58E-11 | 0.305446 | -0.40566 | -0.71111 |
| STAT1           | 8.95E-08 | 2.46E-07 | 1.57E-11 | 0.653964 | -0.89358 | -1.54754 |
| STEAP4          | 0.001925 | 0.001453 | 3.35E-08 | 0.220539 | -0.28588 | -0.50642 |
| STIL            | 0.00225  | 5.79E-06 | 3.58E-10 | 0.205553 | -0.56013 | -0.76568 |
| STK10           | 1.10E-09 | 3.39E-07 | 1.57E-11 | 0.379056 | -0.38079 | -0.75985 |
| STK17A          | 1.51E-08 | 6.70E-10 | 1.57E-11 | 0.347932 | -0.45343 | -0.80136 |
| STK17B          | 1.01E-08 | 2.59E-08 | 1.57E-11 | 0.349249 | -0.48229 | -0.83153 |
| STK39           | 7.27E-06 | 1.40E-09 | 1.70E-11 | 0.392289 | -0.76146 | -1.15375 |
| STMN2           | 0.055177 | 2.91E-09 | 8.66E-11 | 0.193239 | -1.17744 | -1.37068 |
| STX11           | 1.13E-05 | 0.001151 | 2.07E-09 | 0.290478 | -0.3219  | -0.61238 |
| SUCO            | 0.001391 | 1.06E-05 | 4.67E-09 | 0.30127  | -0.35547 | -0.65674 |
| SULF2           | 0.017251 | 0.09585  | 4.53E-05 | 0.290149 | -0.2236  | -0.51375 |
| SULT1E1         | 0.489198 | 5.39E-05 | 1.32E-06 | -0.09682 | 0.707383 | 0.804206 |
| SUSD1           | 1.42E-05 | 9.27E-06 | 9.12E-11 | 0.386206 | -0.48867 | -0.87488 |
| SWAP70          | 2.49E-08 | 5.44E-09 | 1.57E-11 | 0.306269 | -0.30968 | -0.61595 |
| SYK             | 2.82E-08 | 3.07E-06 | 1.95E-11 | 0.294781 | -0.31456 | -0.60934 |
| SYPL2           | 0.866472 | 3.07E-06 | 1.62E-07 | -0.03141 | 0.623094 | 0.654503 |
| SYS1-<br>DBNDD2 | 1.62E-08 | 4.06E-06 | 5.17E-11 | 0.386218 | -0.38794 | -0.77416 |
| SYT13           | 0.149521 | 6.66E-06 | 9.21E-08 | 0.094469 | -0.44333 | -0.5378  |
| SYT17           | 0.049705 | 0.013186 | 5.06E-05 | -0.22358 | 0.396023 | 0.619599 |
| SYTL1           | 1.28E-07 | 0.000401 | 3.59E-11 | 0.413351 | -0.2901  | -0.70346 |
| TACC3           | 0.000169 | 1.10E-06 | 2.19E-10 | 0.308666 | -0.53892 | -0.84759 |
| TAGAP           | 2.82E-08 | 3.29E-06 | 2.08E-10 | 0.236682 | -0.28252 | -0.51921 |
| TAGLN           | 0.167606 | 1.38E-05 | 4.91E-09 | 0.16864  | -0.64371 | -0.81235 |
| TAGLN2          | 0.000547 | 4.91E-10 | 1.34E-10 | 0.225309 | -0.53314 | -0.75845 |
| TAP1            | 8.67E-08 | 2.46E-07 | 1.58E-11 | 0.585045 | -0.76062 | -1.34566 |

|               |          |          |          |          |          |          |
|---------------|----------|----------|----------|----------|----------|----------|
| TAP2          | 2.65E-05 | 0.000362 | 2.43E-10 | 0.294109 | -0.30663 | -0.60074 |
| TARP          | 5.15E-08 | 1.66E-05 | 4.51E-11 | 0.489113 | -0.40545 | -0.89456 |
| TAT           | 0.784859 | 0.001205 | 7.06E-05 | -0.04439 | 0.463518 | 0.507912 |
| TAX1BP3       | 2.21E-05 | 6.28E-11 | 1.69E-11 | 0.384727 | -0.73882 | -1.12355 |
| TBC1D10<br>C  | 1.07E-06 | 1.37E-07 | 5.42E-11 | 0.398698 | -0.4995  | -0.8982  |
| TBC1D2        | 0.121197 | 6.20E-06 | 7.94E-08 | -0.12054 | 0.414921 | 0.53546  |
| TC2N          | 0.000612 | 3.63E-09 | 3.91E-11 | 0.136289 | -0.36428 | -0.50056 |
| TCEA3         | 0.09688  | 1.58E-09 | 2.31E-10 | -0.08871 | 0.439777 | 0.528491 |
| TCEAL3        | 3.69E-06 | 5.00E-09 | 1.85E-11 | 0.335253 | -0.46097 | -0.79622 |
| TCEAL7        | 0.063786 | 0.014191 | 5.46E-05 | 0.190844 | -0.33139 | -0.52223 |
| TCEAL8        | 0.002199 | 5.36E-08 | 3.40E-10 | 0.19171  | -0.42499 | -0.6167  |
| TCEB3-<br>AS1 | 0.014761 | 2.89E-07 | 3.07E-10 | -0.18604 | 0.458027 | 0.644068 |
| TCF19         | 7.74E-07 | 9.09E-09 | 1.69E-11 | 0.392021 | -0.76459 | -1.15661 |
| TCF4          | 2.94E-08 | 3.29E-06 | 2.04E-11 | 0.392803 | -0.35524 | -0.74804 |
| TCHH          | 0.16675  | 0.016948 | 1.02E-06 | 0.184871 | -0.35711 | -0.54198 |
| TCIRG1        | 2.09E-07 | 2.15E-05 | 7.37E-10 | 0.309509 | -0.31401 | -0.62352 |
| TCL1A         | 0.000742 | 0.005625 | 4.12E-07 | 0.245439 | -0.40582 | -0.65126 |
| TCTEX1D<br>2  | 0.008665 | 0.002595 | 1.28E-07 | 0.197786 | -0.32615 | -0.52393 |
| TDGF1         | 0.464651 | 0.069473 | 0.000511 | 0.135209 | -0.36667 | -0.50188 |
| TDGF1P3       | 0.464651 | 0.069473 | 0.000511 | 0.135209 | -0.36667 | -0.50188 |
| TDRD6         | 0.240437 | 0.001517 | 6.33E-05 | -0.12974 | 0.404906 | 0.534646 |
| TDRD7         | 8.94E-05 | 0.002175 | 6.68E-09 | 0.274862 | -0.28034 | -0.5552  |
| TENM1         | 0.036005 | 2.29E-05 | 6.68E-09 | -0.14547 | 0.365202 | 0.510673 |
| TENM2         | 0.707231 | 0.029892 | 0.005111 | -0.06198 | 0.615908 | 0.677892 |
| TES           | 0.01561  | 2.81E-10 | 1.21E-10 | 0.133163 | -0.41837 | -0.55153 |
| TESC          | 0.021653 | 1.38E-06 | 5.43E-09 | 0.144424 | -0.42177 | -0.5662  |
| TFEC          | 8.95E-09 | 2.75E-05 | 1.72E-11 | 0.523319 | -0.53762 | -1.06094 |
| TFPI2         | 0.01428  | 0.264635 | 7.60E-05 | 0.354174 | -0.26772 | -0.62189 |
| TFR2          | 0.004292 | 1.97E-08 | 3.23E-10 | -0.1429  | 0.402766 | 0.545663 |
| TGFB1I1       | 0.013515 | 0.005389 | 1.38E-06 | 0.317212 | -0.4044  | -0.72161 |
| TGFBI         | 0.007129 | 3.45E-08 | 8.66E-11 | 0.200183 | -0.50915 | -0.70934 |
| THBD          | 0.004376 | 0.011798 | 1.11E-06 | 0.284052 | -0.24617 | -0.53022 |
| THBS1         | 0.000138 | 2.59E-08 | 5.72E-10 | 0.225865 | -0.51513 | -0.741   |
| THBS2         | 2.08E-08 | 1.73E-10 | 1.57E-11 | 0.826364 | -1.32263 | -2.149   |
| THEMIS        | 3.55E-07 | 7.48E-07 | 1.95E-11 | 0.483682 | -0.6747  | -1.15838 |
| THEMIS2       | 3.36E-06 | 0.000605 | 5.45E-10 | 0.448753 | -0.42466 | -0.87342 |
| THOP1         | 0.068961 | 2.29E-05 | 2.25E-07 | -0.1544  | 0.658092 | 0.812492 |
| THRB-IT1      | 0.285682 | 8.26E-08 | 2.14E-08 | -0.06726 | 0.639187 | 0.706449 |
| THRSP         | 0.020174 | 0.148123 | 0.00024  | -0.33841 | 0.545893 | 0.884308 |
| THSD7A        | 0.020174 | 0.018189 | 3.24E-05 | 0.155853 | -0.41612 | -0.57197 |
| THY1          | 0.000585 | 6.37E-08 | 1.01E-10 | 0.212819 | -0.74017 | -0.95299 |
| TIGIT         | 4.06E-05 | 8.71E-06 | 5.16E-10 | 0.295272 | -0.50852 | -0.80379 |
| TIMD4         | 0.142343 | 0.075369 | 0.002255 | 0.172397 | -0.36264 | -0.53504 |
| TIMP1         | 5.37E-05 | 1.78E-11 | 1.77E-11 | 0.281215 | -0.90299 | -1.18421 |
| TIMP2         | 9.79E-08 | 4.67E-07 | 3.48E-11 | 0.418803 | -0.44859 | -0.86739 |
| TK1           | 4.61E-05 | 0.001517 | 1.67E-08 | 0.293909 | -0.38999 | -0.6839  |
| TLCD1         | 0.177862 | 1.06E-05 | 2.25E-07 | 0.12522  | -0.45184 | -0.57706 |
| TLR1          | 0.000288 | 0.00052  | 2.54E-09 | 0.527291 | -0.48782 | -1.01511 |
| TLR2          | 1.24E-07 | 0.000109 | 3.07E-11 | 0.502832 | -0.47397 | -0.9768  |
| TLR4          | 4.29E-06 | 0.011356 | 1.11E-08 | 0.334659 | -0.2193  | -0.55396 |
| TLR5          | 0.01879  | 1.61E-08 | 4.91E-10 | 0.178917 | -0.44375 | -0.62267 |
| TLR7          | 3.04E-06 | 0.000211 | 4.29E-11 | 0.239496 | -0.27267 | -0.51216 |
| TLR8          | 8.97E-10 | 9.17E-05 | 1.57E-11 | 0.653493 | -0.53805 | -1.19154 |
| TM6SF1        | 9.79E-08 | 6.97E-07 | 1.58E-11 | 0.620852 | -0.66786 | -1.28872 |
| TM6SF2        | 0.001239 | 0.000308 | 5.43E-09 | -0.21259 | 0.298647 | 0.511239 |

|          |          |          |          |          |          |          |
|----------|----------|----------|----------|----------|----------|----------|
| TMC4     | 0.016372 | 0.00159  | 1.64E-06 | 0.275502 | -0.74023 | -1.01573 |
| TMC6     | 1.07E-06 | 1.47E-05 | 1.15E-10 | 0.268373 | -0.28091 | -0.54929 |
| TMEM100  | 0.011247 | 0.075369 | 9.69E-06 | 0.443063 | -0.38727 | -0.83033 |
| TMEM120  | 0.006506 | 5.73E-05 | 2.54E-09 | -0.19614 | 0.326311 | 0.522453 |
| A        |          |          |          |          |          |          |
| TMEM125  | 0.24863  | 0.000947 | 8.93E-06 | 0.151428 | -0.5655  | -0.71693 |
| TMEM154  | 0.001882 | 0.021535 | 1.02E-07 | 0.82711  | -0.55812 | -1.38523 |
| TMEM164  | 2.08E-06 | 4.52E-09 | 1.69E-11 | 0.246024 | -0.39898 | -0.645   |
| TMEM173  | 9.91E-06 | 4.31E-07 | 4.51E-11 | 0.24887  | -0.35567 | -0.60454 |
| TMEM200  | 7.94E-05 | 9.47E-07 | 2.08E-10 | 0.333895 | -0.86179 | -1.19568 |
| A        |          |          |          |          |          |          |
| TMEM220  | 0.020174 | 0.00052  | 5.20E-08 | -0.20998 | 0.358806 | 0.568788 |
| TMEM243  | 1.62E-08 | 7.37E-10 | 1.60E-11 | 0.562129 | -0.58587 | -1.14799 |
| TMEM255  | 0.017877 | 0.001205 | 1.76E-08 | 0.404544 | -0.78171 | -1.18625 |
| A        |          |          |          |          |          |          |
| TMEM256  | 0.000383 | 1.86E-06 | 2.79E-10 | -0.24377 | 0.363332 | 0.607106 |
| TMEM44-  | 0.043338 | 4.49E-05 | 1.44E-06 | -0.16253 | 0.436069 | 0.598598 |
| AS1      |          |          |          |          |          |          |
| TMEM45B  | 0.273879 | 0.023046 | 0.00102  | 0.188922 | -0.78644 | -0.97536 |
| TMEM50   | 9.47E-08 | 3.53E-10 | 1.57E-11 | 0.265955 | -0.35759 | -0.62354 |
| A        |          |          |          |          |          |          |
| TMEM51   | 2.07E-05 | 4.91E-10 | 2.49E-11 | 0.266145 | -0.53955 | -0.80569 |
| TMEM52   | 0.460806 | 1.21E-05 | 1.27E-06 | -0.08051 | 0.549528 | 0.630036 |
| TMEM55   | 0.000208 | 2.15E-05 | 3.97E-10 | 0.303551 | -0.49995 | -0.8035  |
| A        |          |          |          |          |          |          |
| TMEM56   | 0.175754 | 2.11E-11 | 1.02E-07 | -0.04557 | 0.4947   | 0.540267 |
| TMEM87B  | 7.85E-08 | 0.000547 | 2.31E-10 | 0.34486  | -0.2706  | -0.61546 |
| TMPRSS3  | 0.015053 | 1.21E-05 | 2.42E-09 | 0.155177 | -0.60481 | -0.75999 |
| TMSB10   | 3.61E-09 | 1.06E-12 | 1.57E-11 | 0.463564 | -0.73015 | -1.19371 |
| TMSB4X   | 6.78E-06 | 2.34E-11 | 1.57E-11 | 0.263705 | -0.44223 | -0.70594 |
| TNF      | 0.031573 | 2.75E-05 | 3.11E-07 | 0.12816  | -0.42051 | -0.54867 |
| TNFAIP3  | 2.74E-06 | 1.02E-06 | 2.43E-11 | 0.404329 | -0.49054 | -0.89487 |
| TNFAIP8  | 2.44E-10 | 8.26E-08 | 1.57E-11 | 0.566574 | -0.57454 | -1.14112 |
| TNFAIP8L | 2.80E-05 | 3.12E-05 | 2.81E-09 | 0.281931 | -0.36473 | -0.64666 |
| 2        |          |          |          |          |          |          |
| TNFRSF11 | 0.000412 | 0.001043 | 8.19E-09 | 0.29186  | -0.32507 | -0.61693 |
| A        |          |          |          |          |          |          |
| TNFRSF11 | 0.000762 | 0.000447 | 7.40E-09 | 0.304943 | -0.33481 | -0.63975 |
| B        |          |          |          |          |          |          |
| TNFRSF12 | 0.044064 | 2.09E-07 | 8.19E-09 | 0.182359 | -0.62197 | -0.80433 |
| A        |          |          |          |          |          |          |
| TNFRSF17 | 3.95E-08 | 2.64E-05 | 1.85E-11 | 0.756359 | -1.0001  | -1.75646 |
| TNFRSF1B | 1.10E-05 | 1.56E-05 | 1.88E-10 | 0.337431 | -0.42766 | -0.76509 |
| TNFRSF21 | 8.15E-09 | 3.45E-08 | 1.57E-11 | 0.504902 | -0.7281  | -1.233   |
| TNFSF13B | 4.03E-09 | 4.67E-07 | 1.57E-11 | 0.661137 | -0.74238 | -1.40352 |
| TOMM40   | 0.011025 | 1.97E-08 | 3.23E-10 | 0.20365  | -0.59196 | -0.79561 |
| L        |          |          |          |          |          |          |
| TOP2A    | 6.44E-05 | 8.07E-07 | 2.49E-11 | 0.410905 | -0.87369 | -1.2846  |
| TOX      | 1.13E-05 | 3.07E-06 | 6.26E-11 | 0.361478 | -0.47673 | -0.83821 |
| TOX2     | 0.019802 | 0.023046 | 2.22E-05 | 0.275785 | -0.2522  | -0.52799 |
| TOX3     | 3.39E-05 | 0.046278 | 1.17E-08 | 0.423182 | -0.18612 | -0.6093  |
| TP53BP2  | 0.003492 | 6.20E-06 | 2.56E-10 | 0.180632 | -0.35212 | -0.53275 |
| TP53I3   | 0.007751 | 8.26E-08 | 1.48E-10 | 0.398565 | -0.81293 | -1.21149 |
| TPM1     | 0.001294 | 7.48E-07 | 4.42E-10 | 0.233269 | -0.58276 | -0.81602 |
| TPPP2    | 0.000944 | 6.47E-07 | 7.28E-11 | -0.27749 | 0.550334 | 0.827827 |
| TPX2     | 5.46E-06 | 0.000115 | 1.11E-09 | 0.482373 | -0.63221 | -1.11458 |
| TRAC     | 8.95E-09 | 5.86E-08 | 1.57E-11 | 0.359155 | -0.4253  | -0.78446 |
| TRAF3IP3 | 7.49E-09 | 0.000115 | 3.73E-11 | 0.410479 | -0.33983 | -0.75031 |

|               |          |          |          |          |          |          |
|---------------|----------|----------|----------|----------|----------|----------|
| TRAF5         | 3.40E-09 | 5.47E-10 | 1.57E-11 | 0.37507  | -0.36208 | -0.73715 |
| TRAJ17        | 1.79E-08 | 1.38E-06 | 1.68E-11 | 0.442227 | -0.47013 | -0.91236 |
| TRAPPC2<br>P1 | 0.000392 | 2.93E-05 | 4.45E-09 | 0.213946 | -0.32407 | -0.53801 |
| TRAT1         | 8.94E-05 | 8.10E-06 | 1.79E-10 | 0.370883 | -0.57664 | -0.94752 |
| TRBC1         | 3.58E-09 | 6.06E-09 | 1.57E-11 | 0.913184 | -0.98191 | -1.89509 |
| TRDV2         | 1.79E-08 | 1.38E-06 | 1.68E-11 | 0.442227 | -0.47013 | -0.91236 |
| TREM2         | 0.10091  | 3.66E-07 | 1.06E-10 | 0.175334 | -0.66355 | -0.83889 |
| TRG-AS1       | 0.00567  | 0.000308 | 4.71E-08 | 0.307736 | -0.45301 | -0.76075 |
| TRGC2         | 2.94E-08 | 1.56E-05 | 2.87E-11 | 0.762829 | -0.59312 | -1.35595 |
| TRGV9         | 2.94E-08 | 1.56E-05 | 2.87E-11 | 0.762829 | -0.59312 | -1.35595 |
| TRIM21        | 3.49E-05 | 2.15E-08 | 2.38E-11 | 0.254479 | -0.47202 | -0.7265  |
| TRIM22        | 1.99E-08 | 2.87E-06 | 2.21E-11 | 0.850256 | -0.58536 | -1.43561 |
| TRIM31        | 0.056022 | 6.97E-07 | 1.06E-09 | 0.104679 | -0.50467 | -0.60935 |
| TRIM55        | 0.425639 | 0.073376 | 0.134724 | 0.109251 | 0.536326 | 0.427075 |
| TRIM6         | 0.009859 | 0.000992 | 1.67E-08 | 0.315091 | -0.44162 | -0.75671 |
| TRIM69        | 0.000156 | 6.09E-05 | 2.92E-10 | 0.237347 | -0.29877 | -0.53612 |
| TRIP13        | 0.036005 | 7.48E-07 | 3.97E-10 | 0.1593   | -0.58661 | -0.74591 |
| TRNP1         | 0.229723 | 9.33E-11 | 3.36E-11 | 0.064956 | -0.52645 | -0.59141 |
| TSLP          | 0.04899  | 1.48E-08 | 1.14E-05 | 0.208206 | 0.686311 | 0.478105 |
| TSPAN8        | 0.780458 | 0.026336 | 0.000989 | 0.165179 | -0.73713 | -0.90231 |
| TSP0          | 0.114086 | 0.000144 | 3.68E-08 | 0.148278 | -0.39031 | -0.53859 |
| TSPYL5        | 0.004466 | 0.000121 | 1.11E-07 | 0.374297 | -0.55823 | -0.93253 |
| TTC36         | 7.05E-05 | 4.91E-10 | 1.57E-11 | -0.35683 | 0.886764 | 1.243595 |
| TTK           | 0.000151 | 9.89E-06 | 6.01E-10 | 0.423981 | -0.9435  | -1.36748 |
| TTPA          | 0.357219 | 9.17E-05 | 0.0007   | 0.112393 | 0.544705 | 0.432312 |
| TUBA1A        | 1.31E-08 | 5.72E-11 | 1.57E-11 | 0.648424 | -0.77991 | -1.42834 |
| TUBA1B        | 2.80E-05 | 4.35E-12 | 1.64E-11 | 0.214709 | -0.43311 | -0.64782 |
| TUBA1C        | 0.000193 | 1.05E-12 | 1.57E-11 | 0.228245 | -0.51813 | -0.74638 |
| TUBB6         | 1.29E-05 | 2.59E-08 | 1.57E-11 | 0.398119 | -0.59943 | -0.99755 |
| TUBG1         | 0.000245 | 5.79E-06 | 1.17E-09 | 0.253445 | -0.35267 | -0.60612 |
| TUSC3         | 2.55E-06 | 0.001737 | 1.29E-08 | 0.271378 | -0.2755  | -0.54688 |
| TWSG1         | 0.000203 | 0.001517 | 7.01E-09 | 0.246582 | -0.27254 | -0.51912 |
| TYMP          | 0.000329 | 0.000103 | 2.08E-10 | 0.357509 | -0.51441 | -0.87192 |
| TYMS          | 5.15E-08 | 3.78E-08 | 1.57E-11 | 0.649445 | -0.65507 | -1.30451 |
| TYMSOS        | 3.29E-05 | 0.004364 | 2.66E-10 | 0.397275 | -0.33654 | -0.73382 |
| TYROBP        | 1.34E-05 | 1.93E-07 | 8.29E-11 | 0.430452 | -0.64558 | -1.07604 |
| UAP1L1        | 5.60E-07 | 7.74E-05 | 1.51E-09 | 0.293866 | -0.32922 | -0.62309 |
| UBASH3A       | 0.000281 | 1.47E-05 | 9.63E-11 | 0.446978 | -0.57127 | -1.01825 |
| UBD           | 4.87E-09 | 8.26E-08 | 1.57E-11 | 1.817402 | -1.58444 | -3.40184 |
| UBE2A         | 2.39E-06 | 1.62E-11 | 1.57E-11 | 0.194673 | -0.31985 | -0.51452 |
| UBE2C         | 0.000169 | 2.67E-07 | 9.12E-11 | 0.307872 | -0.73273 | -1.04061 |
| UBE2L6        | 9.49E-05 | 2.29E-05 | 3.07E-10 | 0.338039 | -0.50501 | -0.84305 |
| UBE2Q2        | 9.27E-07 | 5.86E-08 | 1.77E-11 | 0.545429 | -0.5613  | -1.10673 |
| UBE2S         | 0.000274 | 9.27E-06 | 4.67E-10 | 0.344237 | -0.55557 | -0.89981 |
| UBE2T         | 1.29E-05 | 1.30E-10 | 1.68E-11 | 0.437438 | -0.91216 | -1.3496  |
| UBLCP1        | 1.42E-05 | 2.29E-05 | 3.07E-10 | 0.369643 | -0.26499 | -0.63464 |
| UCP2          | 3.25E-06 | 1.38E-05 | 2.56E-10 | 0.4374   | -0.5684  | -1.0058  |
| UGCG          | 0.00245  | 0.000401 | 9.52E-09 | 0.312212 | -0.37504 | -0.68725 |
| UGT2A3        | 0.007606 | 0.231418 | 3.76E-05 | 0.48546  | -0.29488 | -0.78034 |
| UHRF1         | 0.008665 | 9.93E-09 | 1.64E-10 | 0.393208 | -1.43225 | -1.82546 |
| UPB1          | 0.000281 | 5.86E-08 | 6.59E-11 | -0.20673 | 0.470006 | 0.676733 |
| UPP2          | 0.001531 | 0.027147 | 1.79E-06 | 0.733981 | -0.68412 | -1.4181  |
| UTS2          | 0.020512 | 3.53E-05 | 2.95E-09 | 0.276276 | -0.77209 | -1.04836 |
| UXS1          | 1.40E-06 | 1.26E-09 | 1.91E-11 | 0.299878 | -0.41055 | -0.71043 |
| VAMP5         | 0.002065 | 4.53E-08 | 3.23E-10 | 0.181448 | -0.45671 | -0.63816 |
| VAV1          | 0.000238 | 0.002715 | 3.52E-08 | 0.249122 | -0.30575 | -0.55487 |
| VCAN          | 1.11E-06 | 8.73E-07 | 1.69E-11 | 0.453988 | -0.70119 | -1.15518 |

|              |          |          |          |          |          |          |
|--------------|----------|----------|----------|----------|----------|----------|
| VEGFC        | 0.000506 | 0.003375 | 6.26E-08 | 0.358296 | -0.35261 | -0.7109  |
| VIL1         | 0.032081 | 0.181223 | 0.000202 | -0.30287 | 0.239122 | 0.541992 |
| VIM          | 2.02E-08 | 1.01E-09 | 1.57E-11 | 0.359706 | -0.47983 | -0.83953 |
| VMO1         | 0.024816 | 0.0007   | 5.94E-07 | 0.154572 | -0.35558 | -0.51015 |
| VMP1         | 0.002344 | 9.33E-11 | 1.70E-11 | 0.164232 | -0.51073 | -0.67497 |
| VNN2         | 0.000742 | 0.000383 | 2.36E-08 | 0.235394 | -0.35736 | -0.59276 |
| VOPP1        | 3.61E-09 | 1.05E-12 | 1.57E-11 | 0.373048 | -0.59423 | -0.96728 |
| VRK1         | 3.17E-05 | 1.95E-09 | 1.69E-11 | 0.352812 | -0.58393 | -0.93674 |
| VSIG10L      | 0.002668 | 0.000547 | 1.06E-07 | 0.271128 | -0.35361 | -0.62474 |
| VSIG4        | 0.002837 | 1.78E-05 | 6.68E-10 | 0.251531 | -0.45208 | -0.70361 |
| VSNL1        | 0.050444 | 0.000128 | 2.59E-07 | -0.10966 | 0.471496 | 0.581158 |
| VTCN1        | 0.091674 | 2.84E-08 | 9.63E-11 | 0.169711 | -0.92826 | -1.09798 |
| VWA5A        | 1.06E-05 | 5.39E-06 | 3.07E-11 | 0.302049 | -0.3636  | -0.66565 |
| WARS         | 0.000117 | 2.09E-07 | 2.87E-11 | 0.339076 | -0.64161 | -0.98068 |
| WBP5         | 0.000173 | 2.51E-11 | 1.57E-11 | 0.422442 | -0.92609 | -1.34853 |
| WDR54        | 0.000559 | 1.21E-05 | 4.23E-09 | 0.214972 | -0.35338 | -0.56836 |
| WDYHV1       | 0.107949 | 2.15E-06 | 1.58E-08 | 0.132355 | -0.41117 | -0.54352 |
| WFDC1        | 0.011247 | 0.000121 | 5.44E-08 | 0.333503 | -0.58588 | -0.91938 |
| WIPF1        | 9.96E-10 | 5.79E-06 | 1.58E-11 | 0.449554 | -0.42483 | -0.87439 |
| WIPI1        | 0.054414 | 1.73E-06 | 1.87E-09 | 0.1742   | -0.47473 | -0.64893 |
| WISP1        | 0.001799 | 2.15E-06 | 1.72E-10 | 0.198654 | -0.44553 | -0.64419 |
| WLS          | 0.004031 | 0.047733 | 1.28E-05 | 0.347803 | -0.24936 | -0.59716 |
| WSB2         | 7.94E-05 | 2.15E-08 | 3.07E-11 | 0.247942 | -0.34303 | -0.59097 |
| WWC3         | 1.55E-06 | 5.10E-07 | 2.96E-11 | 0.29453  | -0.33428 | -0.62881 |
| XAF1         | 0.010243 | 0.901448 | 0.00448  | 0.426722 | -0.08205 | -0.50877 |
| XCL1         | 3.58E-06 | 0.0009   | 8.19E-09 | 0.435839 | -0.42802 | -0.86385 |
| XCL2         | 4.58E-06 | 0.000153 | 7.70E-10 | 0.616181 | -0.5972  | -1.21338 |
| YAP1         | 2.14E-05 | 2.58E-05 | 5.62E-11 | 0.363408 | -0.31838 | -0.68178 |
| YWHAB        | 9.25E-06 | 4.53E-08 | 3.21E-11 | 0.247916 | -0.28918 | -0.5371  |
| YWHAZ        | 8.67E-08 | 1.95E-09 | 1.57E-11 | 0.289858 | -0.39566 | -0.68552 |
| ZAP70        | 9.13E-08 | 0.000236 | 1.88E-10 | 0.403813 | -0.38873 | -0.79254 |
| ZBTB16       | 0.972676 | 0.002715 | 0.001261 | -0.01505 | 0.674967 | 0.690019 |
| ZC3H12D      | 1.68E-08 | 1.06E-05 | 2.87E-11 | 0.594376 | -0.5771  | -1.17147 |
| ZCCHC6       | 0.97743  | 1.26E-07 | 1.90E-05 | 0.06556  | 0.525951 | 0.460391 |
| ZDHHC11      | 0.807852 | 2.87E-06 | 1.06E-06 | 0.042264 | 0.639066 | 0.596802 |
| ZDHHC11<br>B | 0.626408 | 8.10E-06 | 4.44E-06 | 0.078421 | 0.730268 | 0.651846 |
| ZEB2         | 1.74E-06 | 8.10E-06 | 1.79E-10 | 0.278669 | -0.25123 | -0.5299  |
| ZFP3         | 0.006128 | 0.000737 | 1.06E-07 | 0.302746 | -0.39173 | -0.69447 |
| ZFPM2        | 6.55E-06 | 0.003375 | 9.05E-09 | 0.603282 | -0.40607 | -1.00935 |
| ZG16         | 0.207421 | 3.29E-06 | 2.48E-08 | -0.16987 | 0.717828 | 0.8877   |
| ZG16B        | 0.789185 | 1.47E-05 | 1.27E-06 | 0.034225 | -0.48731 | -0.52153 |
| ZGPAT        | 0.001461 | 2.35E-08 | 7.58E-11 | -0.25546 | 0.748727 | 1.004183 |
| ZKSCAN1      | 0.175754 | 3.53E-10 | 1.76E-08 | -0.06054 | 0.62027  | 0.68081  |
| ZMAT3        | 3.67E-07 | 0.013186 | 1.23E-09 | 0.700315 | -0.30603 | -1.00635 |
| ZNF101       | 1.87E-07 | 6.47E-07 | 3.21E-11 | 0.232881 | -0.27394 | -0.50682 |
| ZNF124       | 0.00047  | 0.00297  | 2.68E-09 | 0.32048  | -0.33089 | -0.65137 |
| ZNF14        | 3.48E-06 | 7.10E-06 | 1.15E-10 | 0.303502 | -0.35696 | -0.66047 |
| ZNF165       | 0.087816 | 3.45E-08 | 1.43E-08 | 0.09051  | -0.58411 | -0.67462 |
| ZNF200       | 0.000183 | 1.28E-06 | 2.66E-10 | 0.221779 | -0.28304 | -0.50482 |
| ZNF267       | 1.33E-08 | 5.97E-07 | 2.13E-11 | 0.531464 | -0.51861 | -1.05008 |
| ZNF367       | 6.55E-06 | 6.97E-07 | 1.21E-10 | 0.561463 | -0.87344 | -1.43491 |
| ZNF385B      | 0.644005 | 8.07E-07 | 5.20E-08 | 0.037618 | 0.614826 | 0.577207 |
| ZNF395       | 0.05777  | 6.28E-11 | 5.62E-11 | -0.11574 | 0.51227  | 0.628011 |
| ZNF430       | 8.73E-09 | 5.51E-07 | 1.64E-11 | 0.28584  | -0.30815 | -0.59399 |
| ZNF439       | 1.11E-06 | 0.000223 | 3.40E-10 | 0.353315 | -0.33521 | -0.68852 |
| ZNF468       | 0.006252 | 6.97E-07 | 2.43E-10 | 0.336981 | -0.60424 | -0.94122 |
| ZNF511       | 0.000173 | 2.25E-07 | 3.97E-10 | -0.23341 | 0.454008 | 0.687416 |

|        |          |          |          |          |          |          |
|--------|----------|----------|----------|----------|----------|----------|
| ZNF532 | 0.006384 | 1.10E-06 | 5.72E-10 | 0.205966 | -0.39634 | -0.60231 |
| ZNF83  | 8.48E-05 | 0.000115 | 3.58E-10 | 0.298887 | -0.37033 | -0.66922 |
| ZNFX1  | 9.25E-06 | 3.33E-05 | 5.17E-11 | 0.325307 | -0.36306 | -0.68837 |
| ZUFSP  | 0.000434 | 0.000277 | 1.23E-09 | 0.261239 | -0.30606 | -0.5673  |
| ZWILCH | 6.64E-05 | 1.10E-06 | 1.72E-10 | 0.257138 | -0.42487 | -0.68201 |
| ZWINT  | 3.58E-06 | 3.39E-07 | 1.57E-11 | 0.907146 | -1.12058 | -2.02773 |
