# Supplementary material for: Transcriptome Classification Reveals Molecular Subgroups in Patients with Hepatitis B Virus
Source: Hindawi journal article supplement (doi:10.1155/2021/5543747), 2021-03-30
Supplement: f2 [file 5543747.f2.pdf]

Table S2. The genes within the functional modules

| Module | gene     | ENTREZID |
|--------|----------|----------|
| M1     | A1CF     | 29974    |
| M2     | AACS     | 65985    |
| M1     | AADACP1  | 201651   |
| M1     | AADAT    | 51166    |
| M2     | AAED1    | NA       |
| M1     | AASS     | 10157    |
| M1     | ABCA6    | 23460    |
| M2     | ABCB1    | 5243     |
| M2     | ABCB4    | 5244     |
| M3     | ABCC1    | 4363     |
| M1     | ABCG2    | 9429     |
| M1     | ABHD15   | 116236   |
| M2     | abParts  | NA       |
| M3     | ABRACL   | 58527    |
| M1     | AC004538 | NA       |
| M1     | AC012065 | NA       |
| M2     | AC017002 | NA       |
| M2     | AC079767 | NA       |
| M2     | AC128677 | NA       |
| M1     | ACACB    | 32       |
| M1     | ACADL    | 33       |
| M1     | ACADS    | 35       |
| M1     | ACADSB   | 36       |
| M2     | ACE2     | 59272    |
| M2     | ACLY     | 47       |
| M1     | ACMSD    | 130013   |
| M1     | ACOT13   | 55856    |
| M2     | ACOT9    | 23597    |
| M1     | ACOX2    | 8309     |
| M3     | ACP5     | 54       |
| M4     | ACSL4    | 2182     |
| M1     | ACSM2A   | 123876   |
| M1     | ACSM2B   | 348158   |
| M1     | ACSM3    | 6296     |
| M1     | ACSM5    | 54988    |
| M3     | ACTB     | 60       |
| M3     | ACTG1    | 71       |
| M3     | ACYP1    | 97       |
| M2     | ADA      | 100      |
| M2     | ADAMDEC  | 27299    |
| M2     | ADAMTS2  | 9509     |
| M2     | ADAMTSL1 | 9719     |
| M2     | ADAP2    | 55803    |
| M1     | ADCY1    | 107      |
| M1     | ADCY10   | 55811    |
| M3     | ADCY7    | 113      |
| M1     | ADH6     | 130      |
| M1     | ADHFE1   | 137872   |
| M3     | ADIRF    | 10974    |
| M1     | ADORA2A  | 646023   |
| M3     | ADORA3   | 140      |
| M1     | ADRA1A   | 148      |
| M2     | ADRA2A   | 150      |
| M2     | ADRBK2   | NA       |
| M2     | AEBP1    | 165      |
| M4     | AF070581 | NA       |

|    |          |          |
|----|----------|----------|
| M2 | AGA      | 175      |
| M1 | AGBL2    | 79841    |
| M1 | AGL      | 178      |
| M1 | AGXT2    | 64902    |
| M2 | AIF1     | 199      |
| M2 | AIM2     | 9447     |
| M3 | AJUBA    | 84962    |
| M3 | AKIP1    | 56672    |
| M2 | AKR1B1   | 231      |
| M2 | AKR1B10  | 57016    |
| M1 | AKR1D1   | 6718     |
| M1 | ALAD     | 210      |
| M1 | ALDH1L1  | 10840    |
| M1 | ALDH6A1  | 4329     |
| M2 | ALDOA    | 226      |
| M2 | ALOX5    | 240      |
| M2 | ALOX5AP  | 241      |
| M1 | ALPK2    | 115701   |
| M2 | AMICA1   | NA       |
| M3 | AMIGO2   | 347902   |
| M1 | AMN      | 81693    |
| M1 | AMT      | 275      |
| M2 | ANGPTL2  | 23452    |
| M2 | ANKRD22  | 118932   |
| M2 | ANKRD29  | 147463   |
| M1 | ANKRD35  | 148741   |
| M2 | ANLN     | 54443    |
| M2 | ANXA1    | 301      |
| M1 | ANXA10   | 11199    |
| M3 | ANXA13   | 312      |
| M2 | ANXA2    | 302      |
| M2 | ANXA2P2  | 304      |
| M2 | ANXA3    | 306      |
| M2 | ANXA4    | 307      |
| M2 | ANXA5    | 308      |
| M3 | AOAH     | 313      |
| M1 | AOX1     | 316      |
| M1 | AP000253 | NA       |
| M2 | AP1S2    | 8905     |
| M2 | APCDD1   | 147495   |
| M2 | APH1B    | 83464    |
| M1 | APOA5    | 116519   |
| M2 | APOBEC3A | 200315   |
| M2 | APOBEC3A | 1.01E+08 |
| M2 | APOBEC3E | 9582     |
| M2 | APOBEC3C | 60489    |
| M1 | APOF     | 319      |
| M2 | APOL3    | 80833    |
| M2 | AQP1     | 358      |
| M1 | AR       | 367      |
| M2 | ARF4     | 378      |
| M1 | ARHGAP10 | 79658    |
| M2 | ARHGAP18 | 93663    |
| M2 | ARHGAP21 | 9938     |
| M2 | ARHGAP4  | 393      |
| M2 | ARHGAP9  | 64333    |
| M2 | ARHGDIB  | 397      |
| M3 | ARHGEF18 | 23370    |

|    |          |        |
|----|----------|--------|
| M1 | ARHGEF26 | 26084  |
| M2 | ARHGEF3  | 50650  |
| M3 | ARHGEF6  | 9459   |
| M2 | ARL4C    | 10123  |
| M3 | ARL6IP5  | 10550  |
| M3 | ARMCX1   | 51309  |
| M2 | ARMCX2   | 9823   |
| M3 | ARMCX3   | 51566  |
| M1 | ARNTL    | 406    |
| M2 | ARNTL2   | 56938  |
| M2 | ARPC1B   | 10095  |
| M2 | ARPC2    | 10109  |
| M2 | ARPC3    | 10094  |
| M2 | ARRDC2   | 27106  |
| M1 | ARRDC3   | 57561  |
| M2 | ARRDC4   | 91947  |
| M1 | ARSE     | NA     |
| M4 | ARSJ     | 79642  |
| M1 | ASB9     | 140462 |
| M3 | ASCC3    | 10973  |
| M4 | ASNS     | 440    |
| M1 | ASPA     | 443    |
| M1 | ASPG     | 374569 |
| M2 | ASPHD2   | 57168  |
| M2 | ASPM     | 259266 |
| M3 | ASPN     | 54829  |
| M3 | ASRGL1   | 80150  |
| M2 | ATAD2    | 29028  |
| M1 | ATF5     | 22809  |
| M1 | ATF7IP2  | 80063  |
| M3 | ATP10D   | 57205  |
| M2 | ATP6V0B  | 533    |
| M2 | ATP6V1F  | 9296   |
| M2 | ATP8B2   | 57198  |
| M3 | ATP8B4   | 79895  |
| M2 | AURKA    | 6790   |
| M1 | AVPR1A   | 552    |
| M1 | AX747132 | NA     |
| M1 | AX747135 | NA     |
| M1 | AZGP1    | 563    |
| M1 | B3GAT1   | 27087  |
| M1 | BAAT     | 570    |
| M2 | BACE2    | 25825  |
| M3 | BAG3     | 9531   |
| M2 | BAMBI    | 25805  |
| M2 | BARD1    | 580    |
| M2 | BATF     | 10538  |
| M2 | BATF2    | 116071 |
| M3 | BAX      | 581    |
| M3 | BAZ1A    | 11177  |
| M1 | BBOX1    | 8424   |
| M2 | BBS12    | 166379 |
| M2 | BBS7     | 55212  |
| M4 | BC034319 | NA     |
| M1 | BC038731 | NA     |
| M1 | BC040327 | NA     |
| M2 | BCAT1    | 586    |
| M1 | BCHE     | 590    |

|    |           |        |
|----|-----------|--------|
| M2 | BCL11B    | 64919  |
| M2 | BCL2A1    | 597    |
| M3 | BEX1      | 55859  |
| M2 | BEX2      | 84707  |
| M3 | BEX4      | 56271  |
| M3 | BEX5      | 340542 |
| M2 | BICC1     | 80114  |
| M2 | BIN2      | 51411  |
| M2 | BIRC3     | 330    |
| M2 | BLM       | 641    |
| M3 | BLOC1S2   | 282991 |
| M2 | BLVRA     | 644    |
| M2 | BMS1P20   | 96610  |
| M2 | BORA      | 79866  |
| M2 | BTG2      | 7832   |
| M3 | BTK       | 695    |
| M2 | BTLA      | 151888 |
| M2 | BTN3A2    | 11118  |
| M2 | BTN3A3    | 10384  |
| M2 | BUB1B     | 701    |
| M2 | C10orf54  | NA     |
| M1 | C11orf71  | 54494  |
| M2 | C11orf80  | 79703  |
| M2 | C11orf96  | 387763 |
| M2 | C12orf4   | 57102  |
| M2 | C12orf5   | NA     |
| M2 | C12orf75  | 387882 |
| M1 | C14orf132 | 56967  |
| M1 | C15orf43  | NA     |
| M2 | C15orf48  | 84419  |
| M2 | C15orf52  | NA     |
| M2 | C16orf54  | 283897 |
| M1 | C17orf67  | 339210 |
| M4 | C1orf106  | NA     |
| M2 | C1orf162  | 128346 |
| M2 | C1orf198  | 84886  |
| M3 | C1orf216  | 127703 |
| M2 | C1orf54   | 79630  |
| M2 | C1QA      | 712    |
| M2 | C1QB      | 713    |
| M2 | C1QC      | 714    |
| M1 | C1R       | 715    |
| M3 | C3AR1     | 719    |
| M1 | C3P1      | 388503 |
| M2 | C4orf48   | 401115 |
| M2 | C5AR1     | 728    |
| M1 | C5orf27   | NA     |
| M1 | C6        | 729    |
| M2 | C7        | 730    |
| M2 | C7orf31   | 136895 |
| M1 | C7orf55   | NA     |
| M1 | C8A       | 731    |
| M1 | C8B       | 732    |
| M1 | C8orf46   | NA     |
| M4 | C9orf152  | 401546 |
| M1 | CACNA1H   | 8912   |
| M2 | CALHM2    | 51063  |
| M2 | CAP1      | 10487  |

|    |          |        |
|----|----------|--------|
| M2 | CAP2     | 10486  |
| M4 | CAPG     | 822    |
| M2 | CAPN2    | 824    |
| M1 | CAPN3    | 825    |
| M1 | CAPN5    | 726    |
| M3 | CAPNS1   | 826    |
| M2 | CARD16   | 114769 |
| M2 | CARD6    | 84674  |
| M1 | CASC10   | NA     |
| M2 | CASP1    | 834    |
| M2 | CASP4    | 837    |
| M3 | CAV2     | 858    |
| M1 | CBFA2T3  | 863    |
| M1 | CBLN4    | 140689 |
| M1 | CBS      | 875    |
| M4 | CCDC102E | 79839  |
| M2 | CCDC109E | NA     |
| M2 | CCDC146  | 57639  |
| M2 | CCDC3    | 83643  |
| M2 | CCDC80   | 151887 |
| M1 | CCL14    | 6358   |
| M2 | CCL18    | 6362   |
| M2 | CCL19    | 6363   |
| M2 | CCL2     | 6347   |
| M4 | CCL20    | 6364   |
| M2 | CCL21    | 6366   |
| M2 | CCL3     | 6348   |
| M2 | CCL3L1   | 6349   |
| M2 | CCL3L3   | 414062 |
| M2 | CCL4     | 6351   |
| M2 | CCL5     | 6352   |
| M2 | CCL8     | 6355   |
| M2 | CCNA2    | 890    |
| M2 | CCNB1    | 891    |
| M3 | CCND1    | 595    |
| M2 | CCNE2    | 9134   |
| M2 | CCR1     | 1230   |
| M2 | CCR2     | 729230 |
| M2 | CCR5     | 1234   |
| M2 | CCR7     | 1236   |
| M2 | CCRL2    | 9034   |
| M1 | CCS      | 9973   |
| M3 | CCT6A    | 908    |
| M2 | CD163    | 9332   |
| M2 | CD163L1  | 283316 |
| M2 | CD1E     | 913    |
| M3 | CD2      | 914    |
| M2 | CD200    | 4345   |
| M2 | CD226    | 10666  |
| M2 | CD24     | 1E+08  |
| M3 | CD247    | 919    |
| M2 | CD27     | 939    |
| M2 | CD300LF  | 146722 |
| M2 | CD38     | 952    |
| M2 | CD3D     | 915    |
| M2 | CD3G     | 917    |
| M2 | CD44     | 960    |
| M2 | CD48     | 962    |

|    |          |        |
|----|----------|--------|
| M2 | CD52     | 1043   |
| M2 | CD53     | 963    |
| M2 | CD58     | 965    |
| M2 | CD5L     | 922    |
| M2 | CD69     | 969    |
| M2 | CD72     | 971    |
| M2 | CD74     | 972    |
| M2 | CD83     | 9308   |
| M2 | CD86     | 942    |
| M2 | CD8A     | 925    |
| M2 | CD96     | 10225  |
| M2 | CD97     | NA     |
| M1 | CDA      | 978    |
| M2 | CDC20    | 991    |
| M2 | CDC25B   | 994    |
| M2 | CDC42EP3 | 10602  |
| M2 | CDC42EP5 | 148170 |
| M2 | CDC42SE1 | 56882  |
| M2 | CDC42SE2 | 56990  |
| M2 | CDC45    | 8318   |
| M2 | CDC6     | 990    |
| M2 | CDC7     | 8317   |
| M2 | CDCA3    | 83461  |
| M2 | CDCA5    | 113130 |
| M3 | CDCA7L   | 55536  |
| M2 | CDH11    | 1009   |
| M3 | CDHR2    | 54825  |
| M1 | CDHR5    | 53841  |
| M2 | CDK1     | 983    |
| M1 | CDK3     | 1018   |
| M2 | CDKN1A   | 1026   |
| M2 | CDKN1C   | 1028   |
| M2 | CDKN2C   | 1031   |
| M2 | CDKN3    | 1033   |
| M1 | CDO1     | 1036   |
| M2 | CECR1    | NA     |
| M1 | CECR2    | 27443  |
| M3 | CELF2    | 10659  |
| M2 | CENPA    | 1058   |
| M2 | CENPE    | 1062   |
| M4 | CENPH    | 64946  |
| M2 | CENPK    | 64105  |
| M2 | CENPM    | 79019  |
| M2 | CENPU    | 79682  |
| M2 | CENPW    | 387103 |
| M2 | CEP55    | 55165  |
| M1 | CES3     | 23491  |
| M1 | CES4A    | 283848 |
| M1 | CES5A    | 221223 |
| M2 | CFD      | 1675   |
| M1 | CFHR3    | 10878  |
| M1 | CFHR4    | 10877  |
| M1 | CFHR5    | 81494  |
| M4 | CFTR     | 1080   |
| M1 | CGN      | 57530  |
| M2 | CH17-132 | NA     |
| M2 | CH25H    | 9023   |
| M1 | CHAD     | 1101   |

|    |          |          |
|----|----------|----------|
| M2 | CHEK2    | 11200    |
| M4 | CHI3L1   | 1116     |
| M2 | CHMP3    | 51652    |
| M4 | CHRDL1   | 91851    |
| M2 | CHST11   | 50515    |
| M2 | CHST4    | 10164    |
| M2 | CHST9    | 83539    |
| M3 | CHSY1    | 22856    |
| M1 | CIDEB    | 27141    |
| M2 | CKAP2    | 26586    |
| M2 | CKLF     | 51192    |
| M2 | CKLF-CMT | 1.01E+08 |
| M4 | CKMT2    | 1160     |
| M2 | CKS2     | 1164     |
| M2 | CLDN10   | 9071     |
| M2 | CLDN11   | 5010     |
| M1 | CLDN14   | 23562    |
| M2 | CLDN7    | 1366     |
| M2 | CLEC11A  | 6320     |
| M2 | CLEC2B   | 9976     |
| M2 | CLEC2D   | 29121    |
| M2 | CLEC4A   | 50856    |
| M2 | CLEC7A   | 64581    |
| M2 | CLIC1    | 1192     |
| M3 | CLIC2    | 1193     |
| M2 | CLIC3    | 9022     |
| M2 | CLIC6    | 54102    |
| M2 | CLIP4    | 79745    |
| M1 | CMBL     | 134147   |
| M2 | CMPK2    | 129607   |
| M2 | CMTM7    | 112616   |
| M1 | CMTM8    | 152189   |
| M1 | CNDP1    | 84735    |
| M1 | CNGA1    | 1259     |
| M3 | CNOT6    | 57472    |
| M3 | CNRIP1   | 25927    |
| M1 | COBLL1   | 22837    |
| M4 | COL15A1  | 1306     |
| M2 | COL16A1  | 1307     |
| M2 | COL1A1   | 1277     |
| M2 | COL1A2   | 1278     |
| M2 | COL3A1   | 1281     |
| M2 | COL4A1   | 1282     |
| M2 | COL4A2   | 1284     |
| M2 | COL4A4   | 1286     |
| M2 | COL5A1   | 1289     |
| M2 | COL5A2   | 1290     |
| M2 | COL6A2   | 1292     |
| M2 | COL6A3   | 1293     |
| M2 | COMMD8   | 54951    |
| M1 | COQ10A   | 93058    |
| M2 | CORO1A   | 11151    |
| M2 | CORO1C   | 23603    |
| M2 | COTL1    | 23406    |
| M4 | COX7A1   | 1346     |
| M4 | CPA3     | 1359     |
| M1 | CPS1-IT1 | 29034    |
| M2 | CPVL     | 54504    |

|    |          |          |
|----|----------|----------|
| M3 | CRIM1    | 51232    |
| M2 | CRIP1    | 1396     |
| M2 | CRISPLD2 | 83716    |
| M3 | CRLF3    | 51379    |
| M2 | CRP      | 1401     |
| M2 | CRTAM    | 56253    |
| M4 | CRYAB    | 1410     |
| M3 | CRYBG3   | 131544   |
| M2 | CSF1R    | 1436     |
| M3 | CSF2RB   | 1439     |
| M2 | CST7     | 8530     |
| M1 | CTD-2284 | NA       |
| M1 | CTD-3080 | 1.02E+08 |
| M1 | CTD-3193 | NA       |
| M2 | CTGF     | NA       |
| M4 | CTHRC1   | 115908   |
| M1 | CTNNA3   | 29119    |
| M3 | CTR9     | 9646     |
| M3 | CTSA     | 5476     |
| M2 | CTSC     | 1075     |
| M3 | CTSD     | 1509     |
| M2 | CTSK     | 1513     |
| M2 | CTSS     | 1520     |
| M2 | CTTNBP2N | 55917    |
| M1 | CUX2     | 23316    |
| M4 | CXCL1    | 2919     |
| M2 | CXCL10   | 3627     |
| M2 | CXCL11   | 6373     |
| M3 | CXCL12   | 6387     |
| M2 | CXCL13   | 10563    |
| M2 | CXCL16   | 58191    |
| M1 | CXCL2    | 2920     |
| M2 | CXCL6    | 6372     |
| M4 | CXCL8    | 3576     |
| M2 | CXCL9    | 4283     |
| M2 | CXCR4    | 7852     |
| M2 | CXCR6    | 10663    |
| M3 | CXorf23  | NA       |
| M3 | CXorf38  | 159013   |
| M2 | CYAT1    | 1E+08    |
| M2 | CYBRD1   | 79901    |
| M3 | CYP11A1  | 1583     |
| M1 | CYP1A1   | 1543     |
| M1 | CYP1A2   | 1544     |
| M1 | CYP26A1  | 1592     |
| M1 | CYP2A13  | 1553     |
| M1 | CYP2A6   | 1548     |
| M1 | CYP2A7   | 1549     |
| M1 | CYP2C19  | 1557     |
| M1 | CYP2D7P  | NA       |
| M1 | CYP39A1  | 51302    |
| M1 | CYP3A4   | 1576     |
| M1 | CYP3A43  | 64816    |
| M4 | CYP3A7   | 1551     |
| M1 | CYP4A11  | 1579     |
| M1 | CYP4A22  | 284541   |
| M1 | CYP4F12  | 66002    |
| M1 | CYP4F3   | 4051     |



|    |           |          |
|----|-----------|----------|
| M1 | CYP7A1    | 1581     |
| M2 | CYR61     | NA       |
| M2 | CYS1      | 192668   |
| M2 | CYSLTR1   | 10800    |
| M2 | CYTIP     | 9595     |
| M2 | DACT1     | 51339    |
| M1 | DAK       | NA       |
| M3 | DBF4      | 10926    |
| M1 | DBH-AS1   | 138948   |
| M2 | DBN1      | 1627     |
| M2 | DBNDD2    | 55861    |
| M1 | DCDC1     | 341019   |
| M2 | DCDC2     | 51473    |
| M1 | DCDC5     | NA       |
| M2 | DCK       | 1633     |
| M2 | DCN       | 1634     |
| M2 | DDB2      | 1643     |
| M2 | DDIAS     | 220042   |
| M2 | DDX26B    | NA       |
| M2 | DDX39A    | 10212    |
| M3 | DDX60     | 55601    |
| M2 | DEFB1     | 1672     |
| M2 | DENND1C   | 79958    |
| M3 | DENND2D   | 79961    |
| M3 | DENND6A   | 201627   |
| M2 | DEPDC1    | 55635    |
| M4 | DEPDC1B   | 55789    |
| M3 | DFNA5     | NA       |
| M1 | DGAT2     | 84649    |
| M1 | DHRS1     | 115817   |
| M1 | DHRS2     | 10202    |
| M1 | DHRS4-AS  | 55449    |
| M2 | DHRS9     | 10170    |
| M1 | DIRAS3    | 9077     |
| M2 | DKFZp667. | NA       |
| M2 | DKK3      | 27122    |
| M1 | DLEU1     | 10301    |
| M2 | DLGAP5    | 9787     |
| M1 | DMGDH     | 29958    |
| M3 | DMXL2     | 23312    |
| M1 | DNAJC12   | 56521    |
| M1 | DNAJC25   | 548645   |
| M1 | DNAJC25-  | 552891   |
| M2 | DNAJC5B   | 85479    |
| M1 | DNM1      | 1759     |
| M2 | DNM3OS    | 1.01E+08 |
| M3 | DNMT1     | 1786     |
| M1 | DNMT3L    | 29947    |
| M2 | DOCK10    | 55619    |
| M2 | DOCK11    | 139818   |
| M2 | DOCK2     | 1794     |
| M3 | DOCK8     | 81704    |
| M2 | DOK2      | 9046     |
| M2 | DOK3      | 79930    |
| M2 | DPT       | 1805     |
| M3 | DPYSL2    | 1808     |
| M2 | DRAM1     | 55332    |
| M3 | DRAM2     | 128338   |

|    |         |        |
|----|---------|--------|
| M1 | DSG1    | 1828   |
| M2 | DSN1    | 79980  |
| M2 | DTL     | 51514  |
| M2 | DUSP2   | 1844   |
| M2 | DYNLT1  | 6993   |
| M2 | DZIP1   | 22873  |
| M2 | E2F3    | 1871   |
| M4 | E2F8    | 79733  |
| M2 | EBI3    | 10148  |
| M1 | EBPL    | 84650  |
| M1 | ECHDC2  | 55268  |
| M2 | ECT2    | 1894   |
| M2 | EDNRB   | 1910   |
| M3 | EFCAB7  | 84455  |
| M2 | EFEMP1  | 2202   |
| M2 | EFEMP2  | 30008  |
| M1 | EFHD1   | 80303  |
| M1 | EFNA1   | 1942   |
| M2 | EGR1    | 1958   |
| M2 | EGR2    | 1959   |
| M2 | EGR3    | 1960   |
| M2 | ELF3    | 1999   |
| M2 | ELF4    | 2000   |
| M2 | ELOVL1  | 64834  |
| M2 | ELOVL2  | 54898  |
| M2 | ELOVL7  | 79993  |
| M2 | EMILIN1 | 11117  |
| M2 | EMP3    | 2014   |
| M2 | EMR1    | NA     |
| M2 | EMR2    | NA     |
| M2 | ENDOD1  | 23052  |
| M1 | ENHO    | 375704 |
| M1 | ENPP1   | 5167   |
| M2 | ENPP2   | 5168   |
| M4 | ENPP5   | 59084  |
| M3 | ENPP7   | 339221 |
| M2 | ENTPD1  | 953    |
| M3 | EOGT    | 285203 |
| M3 | EOMES   | 8320   |
| M2 | EPB41L2 | 2037   |
| M2 | EPB41L3 | 23136  |
| M4 | EPCAM   | 4072   |
| M2 | EPDR1   | 54749  |
| M2 | EPHA3   | 2042   |
| M1 | EPHB1   | 2047   |
| M1 | EPHX2   | 2053   |
| M2 | EPSTI1  | 94240  |
| M2 | ERAP2   | 64167  |
| M3 | ERI1    | 90459  |
| M2 | ERICH5  | 203111 |
| M3 | ERMP1   | 79956  |
| M2 | ERP27   | 121506 |
| M1 | ERRFI1  | 54206  |
| M4 | ESRP1   | 54845  |
| M1 | ETNK2   | 55224  |
| M2 | ETV7    | 51513  |
| M2 | EVI2A   | 2123   |
| M3 | EVI2B   | 2124   |

|    |         |        |
|----|---------|--------|
| M3 | EXOC1   | 55763  |
| M1 | EXPH5   | 23086  |
| M2 | EZH2    | 2146   |
| M1 | F11     | 2160   |
| M2 | F13A1   | 2162   |
| M3 | F2RL1   | 2150   |
| M2 | F3      | 2152   |
| M4 | FABP3   | 2170   |
| M4 | FABP4   | 2167   |
| M2 | FABP5   | 2171   |
| M3 | FADS1   | 3992   |
| M2 | FAIM    | 55179  |
| M2 | FAIM3   | NA     |
| M2 | FAM102B | 284611 |
| M4 | FAM111B | 374393 |
| M3 | FAM122B | 159090 |
| M4 | FAM124B | 79843  |
| M3 | FAM127A | NA     |
| M2 | FAM129A | NA     |
| M1 | FAM134B | NA     |
| M2 | FAM150B | NA     |
| M1 | FAM151A | 338094 |
| M2 | FAM169A | 26049  |
| M1 | FAM198A | NA     |
| M2 | FAM213B | NA     |
| M2 | FAM26F  | NA     |
| M4 | FAM3B   | 54097  |
| M3 | FAM46C  | NA     |
| M2 | FAM49A  | 81553  |
| M2 | FAM57A  | NA     |
| M2 | FAM60A  | NA     |
| M2 | FAM65B  | NA     |
| M2 | FAM72A  | 729533 |
| M2 | FAM72B  | 653820 |
| M2 | FAM72C  | 554282 |
| M2 | FAM72D  | 728833 |
| M2 | FAM78A  | 286336 |
| M1 | FAM9B   | 171483 |
| M2 | FANCI   | 55215  |
| M4 | FAP     | 2191   |
| M2 | FAR1    | 84188  |
| M3 | FAS     | 355    |
| M2 | FAT1    | 2195   |
| M2 | FBLN5   | 10516  |
| M2 | FBN1    | 2200   |
| M3 | FBXO6   | 26270  |
| M3 | FCAMR   | 83953  |
| M2 | FCER1G  | 2207   |
| M2 | FCGR1A  | 2209   |
| M2 | FCGR1B  | 2210   |
| M2 | FCGR1C  | NA     |
| M3 | FCGR3A  | 2214   |
| M3 | FCGR3B  | 2215   |
| M2 | FCN1    | 2219   |
| M2 | FCRL3   | 115352 |
| M3 | FDXR    | 2232   |
| M2 | FEN1    | 2237   |
| M3 | FERMT3  | 83706  |

|    |           |          |
|----|-----------|----------|
| M2 | FGF13     | 2258     |
| M1 | FGF14-AS: | 283481   |
| M2 | FGL2      | 10875    |
| M2 | FGR       | 2268     |
| M2 | FHL2      | 2274     |
| M2 | FHOD1     | 29109    |
| M3 | FIG4      | 9896     |
| M3 | FIGNL1    | 63979    |
| M2 | FILIP1L   | 11259    |
| M1 | FITM1     | 161247   |
| M2 | FJX1      | 24147    |
| M2 | FKBP11    | 51303    |
| M4 | FKBP1A-SI | 1.01E+08 |
| M2 | FKBP1B    | 2281     |
| M2 | FLJ12120  | NA       |
| M1 | FLJ22763  | NA       |
| M2 | FLJ32255  | 643977   |
| M2 | FLNA      | 2316     |
| M3 | FLRT3     | 23767    |
| M2 | FLVCR1    | 28982    |
| M2 | FMO1      | 2326     |
| M2 | FMO2      | 2327     |
| M1 | FMO5      | 2330     |
| M2 | FMOD      | 2331     |
| M4 | FNDC1     | 84624    |
| M1 | FNIP2     | 57600    |
| M1 | FOLH1     | 2346     |
| M1 | FOLH1B    | 219595   |
| M2 | FOS       | 2353     |
| M2 | FOXM1     | 2305     |
| M4 | FOXQ1     | 94234    |
| M2 | FPR3      | 2359     |
| M2 | FRMD3     | 257019   |
| M2 | FRMD6     | 122786   |
| M2 | FSTL3     | 10272    |
| M1 | FTCD      | 10841    |
| M3 | FUNDC1    | 139341   |
| M2 | FUT4      | 2526     |
| M2 | FUT8      | 2530     |
| M1 | FXYD1     | 5348     |
| M2 | FXYD2     | 486      |
| M2 | FXYD5     | 53827    |
| M2 | FXYD6-FX  | 1.01E+08 |
| M2 | FYB       | NA       |
| M2 | FZD6      | 8323     |
| M2 | FZD7      | 8324     |
| M1 | G6PC      | 2538     |
| M3 | GABBR1    | 2550     |
| M2 | GABRE     | 2564     |
| M4 | GABRP     | 2568     |
| M1 | GALK1     | 2584     |
| M3 | GALNT7    | 51809    |
| M2 | GAPT      | 202309   |
| M1 | GAS2      | 2620     |
| M2 | GAS2L3    | 283431   |
| M1 | GBA3      | 57733    |
| M3 | GBAS      | NA       |
| M2 | GBP1      | 2633     |

|    |         |        |
|----|---------|--------|
| M2 | GBP2    | 2634   |
| M3 | GBP3    | 2635   |
| M2 | GBP4    | 115361 |
| M2 | GBP5    | 115362 |
| M2 | GCA     | 25801  |
| M1 | GCAT    | 23464  |
| M1 | GCDH    | 2639   |
| M1 | GCHFR   | 2644   |
| M4 | GCK     | 2645   |
| M1 | GCKR    | 2646   |
| M2 | GDF15   | 9518   |
| M2 | GEM     | 2669   |
| M1 | GFRA1   | 2674   |
| M1 | GGACT   | 87769  |
| M2 | GGTA1P  | 2681   |
| M3 | GIMAP2  | 26157  |
| M3 | GIMAP4  | 55303  |
| M3 | GIMAP6  | 474344 |
| M3 | GIMAP7  | 168537 |
| M2 | GINS1   | 9837   |
| M2 | GINS3   | 64785  |
| M2 | GJA1    | 2697   |
| M2 | GK      | 2710   |
| M2 | GK3P    | 2713   |
| M2 | GLA     | 2717   |
| M2 | GLIPR1  | 11010  |
| M2 | GLIPR2  | 152007 |
| M2 | GLIS2   | 84662  |
| M4 | GLIS3   | 169792 |
| M1 | GLS2    | 27165  |
| M2 | GLT8D2  | 83468  |
| M1 | GLYAT   | 10249  |
| M1 | GLYCTK  | 132158 |
| M2 | GMFB    | 2764   |
| M2 | GMFG    | 9535   |
| M2 | GMNN    | 51053  |
| M2 | GMPR    | 2766   |
| M1 | GNE     | 10020  |
| M1 | GNMT    | 27232  |
| M3 | GNPDA1  | 10007  |
| M3 | GNPDA2  | 132789 |
| M3 | GNS     | 2799   |
| M2 | GOLM1   | 51280  |
| M2 | GOLT1B  | 51026  |
| M3 | GORAB   | 92344  |
| M1 | GPAM    | 57678  |
| M4 | GPC3    | 2719   |
| M2 | GPC4    | 2239   |
| M2 | GPCPD1  | 56261  |
| M1 | GPOR1   | 2852   |
| M2 | GPNMB   | 10457  |
| M2 | GPR124  | NA     |
| M1 | GPR125  | NA     |
| M3 | GPR137B | 7107   |
| M2 | GPR137C | 283554 |
| M2 | GPR160  | 26996  |
| M2 | GPR171  | 29909  |
| M2 | GPR18   | 2841   |

|    |         |        |
|----|---------|--------|
| M3 | GPR34   | 2857   |
| M2 | GPR56   | NA     |
| M3 | GPR65   | 8477   |
| M2 | GPR82   | 27197  |
| M1 | GPR88   | 54112  |
| M2 | GPRC5B  | 51704  |
| M2 | GPRIN3  | 285513 |
| M2 | GPX2    | 2877   |
| M3 | GPX3    | 2878   |
| M2 | GPX7    | 2882   |
| M4 | GPX8    | 493869 |
| M4 | GRAMD1B | 57476  |
| M1 | GRAMD1C | 54762  |
| M1 | GRAMD3  | NA     |
| M1 | GRB14   | 2888   |
| M1 | GREM1   | 26585  |
| M1 | GREM2   | 64388  |
| M4 | GRHL2   | 79977  |
| M3 | GRN     | 2896   |
| M1 | GRTP1   | 79774  |
| M1 | GSDMB   | 55876  |
| M3 | GSKIP   | 51527  |
| M2 | GSTP1   | 2950   |
| M2 | GUCY1A3 | NA     |
| M2 | GYG1    | 2992   |
| M2 | GYPC    | 2995   |
| M1 | GYS2    | 2998   |
| M2 | GZMA    | 3001   |
| M2 | GZMB    | 3002   |
| M2 | GZMH    | 2999   |
| M3 | GZMK    | 3003   |
| M3 | H19     | 283120 |
| M2 | H2AFY2  | NA     |
| M2 | H2AFZ   | NA     |
| M1 | HAAO    | 23498  |
| M1 | HAGH    | 3029   |
| M1 | HAO2    | 51179  |
| M1 | HAPLN4  | 404037 |
| M3 | HAUS3   | 79441  |
| M1 | HBA1    | 3039   |
| M1 | HBA2    | 3040   |
| M1 | HBB     | 3043   |
| M2 | HCAR3   | 8843   |
| M2 | HCK     | 3055   |
| M3 | HCLS1   | 3059   |
| M2 | HCP5    | 10866  |
| M2 | HCST    | 10870  |
| M1 | HDHD3   | 81932  |
| M2 | HEG1    | 57493  |
| M2 | HELLS   | 3070   |
| M2 | HENMT1  | 113802 |
| M1 | HEPACAM | 220296 |
| M2 | HEPH    | 9843   |
| M1 | HEPN1   | 641654 |
| M2 | HES4    | 57801  |
| M2 | HGF     | 3082   |
| M1 | HGFAC   | 3083   |
| M3 | HIF1A   | 3091   |

|    |          |          |
|----|----------|----------|
| M2 | HJURP    | 55355    |
| M2 | HK1      | 3098     |
| M2 | HK3      | 3101     |
| M2 | HKDC1    | 80201    |
| M2 | HLA-A    | 3105     |
| M2 | HLA-B    | 3106     |
| M2 | HLA-C    | 3107     |
| M2 | HLA-DMA  | 3108     |
| M2 | HLA-DMB  | 3109     |
| M2 | HLA-DPA1 | 3113     |
| M2 | HLA-DPB1 | 3115     |
| M2 | HLA-DPB2 | 3116     |
| M2 | HLA-DQA: | 3117     |
| M3 | HLA-DQA: | 3118     |
| M2 | HLA-DQB: | 3119     |
| M2 | HLA-DRA  | 3122     |
| M4 | HLA-DRB1 | 3123     |
| M4 | HLA-DRB3 | 3125     |
| M2 | HLA-DRB4 | 3126     |
| M4 | HLA-DRB5 | 3127     |
| M2 | HLA-DRB6 | 3128     |
| M2 | HLA-E    | 3133     |
| M2 | HLA-F    | 3134     |
| M2 | HLA-G    | 3135     |
| M2 | HLA-J    | 3137     |
| M1 | HLX      | 3142     |
| M2 | HMCN1    | 83872    |
| M2 | HMGB2    | 3148     |
| M1 | HMGCS2   | 3158     |
| M2 | HMGN1    | 3150     |
| M2 | HMGN4    | 10473    |
| M2 | HMMR     | 3161     |
| M3 | HMOX1    | 3162     |
| M2 | HN1      | NA       |
| M1 | HNF4A-AS | 1.02E+08 |
| M1 | HOGA1    | 112817   |
| M1 | HOMER2   | 9455     |
| M3 | HOTS     | 1.03E+08 |
| M1 | HPN      | 3249     |
| M1 | HPR      | 3250     |
| M3 | HPS5     | 11234    |
| M3 | HPSE     | 10855    |
| M4 | HRCT1    | 646962   |
| M4 | HS3ST2   | 9956     |
| M1 | HSBP1L1  | 440498   |
| M1 | HSD11B1  | 3290     |
| M1 | HSD17B14 | 51171    |
| M2 | HSPA2    | 3306     |
| M2 | HSPA4L   | 22824    |
| M2 | HSPA6    | 3310     |
| M1 | HSPB9    | 94086    |
| M3 | HSPBAP1  | 79663    |
| M2 | HTR2B    | 3357     |
| M1 | IAPP     | 3375     |
| M2 | IARS     | NA       |
| M2 | ICAM1    | 3383     |
| M2 | ICAM2    | 3384     |
| M2 | ICOS     | 29851    |

|    |           |          |
|----|-----------|----------|
| M3 | ID1       | 3397     |
| M2 | ID3       | 3399     |
| M2 | ID4       | 3400     |
| M2 | IDO1      | 3620     |
| M4 | IER3      | 8870     |
| M3 | IER5      | 51278    |
| M2 | IER5L     | 389792   |
| M3 | IFI16     | 3428     |
| M2 | IFI27     | 3429     |
| M2 | IFI30     | 10437    |
| M2 | IFI35     | 3430     |
| M2 | IFI44     | 10561    |
| M2 | IFI44L    | 10964    |
| M2 | IFI6      | 2537     |
| M2 | IFIT3     | 3437     |
| M2 | IFIT5     | 24138    |
| M2 | IFITM1    | 8519     |
| M2 | IFNG      | 3458     |
| M2 | IFNGR1    | 3459     |
| M3 | IFNGR2    | 3460     |
| M1 | IGFALS    | 3483     |
| M2 | IGFBP6    | 3489     |
| M2 | IGFBP7    | 3490     |
| M2 | IGH       | 3492     |
| M2 | IGHA1     | 3493     |
| M2 | IGHA2     | 3494     |
| M2 | IGHD      | 3495     |
| M2 | IGHG2     | 3501     |
| M2 | IGHG3     | 3502     |
| M2 | IGHG4     | 3503     |
| M2 | IGHM      | 3507     |
| M2 | IGHV3-23  | 28442    |
| M2 | IGHV4-31  | 28396    |
| M2 | IGJ       | NA       |
| M2 | IGK       | 50802    |
| M2 | IGKC      | 3514     |
| M2 | IGKV1-17  | 28937    |
| M2 | IGKV1-37  | 28931    |
| M2 | IGKV1D-37 | 28894    |
| M2 | IGKV1OR   | NA       |
| M2 | IGKV1OR1  | 642424   |
| M2 | IGKV1OR2  | 28862    |
| M2 | IGKV1OR2  | 1.06E+08 |
| M2 | IGKV2-28  | 28921    |
| M2 | IGKV2D-28 | 28883    |
| M2 | IGKV4-1   | 28908    |
| M2 | IGLC1     | 3537     |
| M2 | IGLJ2     | 28832    |
| M2 | IGLJ3     | 28831    |
| M2 | IGLL3P    | 91353    |
| M2 | IGLL5     | 1E+08    |
| M2 | IGLV@     | 3546     |
| M2 | IGLV1-36  | 28826    |
| M2 | IGLV1-40  | 28825    |
| M2 | IGLV1-44  | 28823    |
| M2 | IGLV1-50  | 28821    |
| M2 | IGLV2-14  | 28815    |
| M2 | IGLV3-1   | 28809    |



|    |           |          |
|----|-----------|----------|
| M2 | IGLV3-10  | 28803    |
| M2 | IGLV3-19  | 28797    |
| M2 | IGLV3-25  | 28793    |
| M4 | IGLV9-49  | 28773    |
| M2 | IGSF6     | 10261    |
| M1 | IGSF9     | 57549    |
| M2 | IKBIP     | 121457   |
| M2 | IKZF3     | 22806    |
| M2 | IL10RA    | 3587     |
| M2 | IL15      | 3600     |
| M2 | IL15RA    | 3601     |
| M2 | IL18      | 3606     |
| M2 | IL1B      | 3553     |
| M1 | IL1RAP    | 3556     |
| M4 | IL20RB    | 53833    |
| M2 | IL21R     | 50615    |
| M2 | IL2RB     | 3560     |
| M2 | IL2RG     | 3561     |
| M3 | IL32      | 9235     |
| M1 | IL6R      | 3570     |
| M2 | IL7       | 3574     |
| M2 | IL7R      | 3575     |
| M2 | INMT      | 11185    |
| M2 | INPP5F    | 22876    |
| M2 | IPCEF1    | 26034    |
| M3 | IQGAP1    | 8826     |
| M2 | IRF1      | 3659     |
| M2 | IRF8      | 3394     |
| M1 | IRS1      | 3667     |
| M1 | IRS2      | 8660     |
| M2 | ISG15     | 9636     |
| M2 | ISG20     | 3669     |
| M2 | ISLR      | 3671     |
| M2 | ITGA2     | 3673     |
| M2 | ITGA4     | 3676     |
| M2 | ITGA6     | 3655     |
| M2 | ITGAL     | 3683     |
| M2 | ITGAM     | 3684     |
| M2 | ITGAV     | 3685     |
| M2 | ITGB2     | 3689     |
| M2 | ITGB2-AS1 | 1.01E+08 |
| M2 | ITGB3BP   | 23421    |
| M2 | ITGBL1    | 9358     |
| M1 | ITIH1     | 3697     |
| M2 | ITIH5     | 80760    |
| M2 | ITK       | 3702     |
| M4 | ITLN1     | 55600    |
| M2 | ITM2A     | 9452     |
| M2 | JAG1      | 182      |
| M2 | JAK2      | 3717     |
| M3 | JAZF1     | 221895   |
| M2 | JUN       | 3725     |
| M2 | JUNB      | 3726     |
| M2 | KAL1      | NA       |
| M1 | KANK4     | 163782   |
| M1 | KBTBD11   | 9920     |
| M2 | KBTBD8    | 84541    |
| M2 | KCNJ10    | 3766     |

|    |           |          |
|----|-----------|----------|
| M2 | KCNJ16    | 3773     |
| M2 | KCNJ2     | 3759     |
| M1 | KCNK5     | 8645     |
| M1 | KCNN2     | 3781     |
| M3 | KCNS3     | 3790     |
| M3 | KCTD12    | 115207   |
| M3 | KCTD9     | 54793    |
| M2 | KDELR3    | 11015    |
| M1 | KHK       | 3795     |
| M2 | KIAA0101  | NA       |
| M3 | KIAA0226L | NA       |
| M4 | KIAA1211  | NA       |
| M3 | KIAA1598  | NA       |
| M1 | KIAA1804  | NA       |
| M2 | KIF11     | 3832     |
| M2 | KIF14     | 9928     |
| M2 | KIF15     | 56992    |
| M3 | KIF16B    | 55614    |
| M2 | KIF18A    | 81930    |
| M2 | KIF18B    | 146909   |
| M2 | KIF20A    | 10112    |
| M2 | KIF21B    | 23046    |
| M2 | KIF2A     | 3796     |
| M2 | KIF4A     | 24137    |
| M2 | KIF5B     | 3799     |
| M1 | KLB       | 152831   |
| M3 | KLF6      | 1316     |
| M2 | KLHL29    | 114818   |
| M2 | KLHL6     | 89857    |
| M1 | KLKB1     | 3818     |
| M2 | KLRB1     | 3820     |
| M2 | KLRC1     | 3821     |
| M2 | KLRC2     | 3822     |
| M2 | KLRC4-KLF | 1.01E+08 |
| M2 | KLRK1     | 22914    |
| M2 | KNTC1     | 9735     |
| M2 | KPNA2     | 3838     |
| M2 | KRT18     | 3875     |
| M2 | KRT19     | 3880     |
| M2 | KRT222    | 125113   |
| M4 | KRT23     | 25984    |
| M3 | KRT8      | 3856     |
| M2 | LAIR1     | 3903     |
| M2 | LAIR2     | 3904     |
| M2 | LAMA2     | 3908     |
| M3 | LAMB1     | 3912     |
| M2 | LAMP3     | 27074    |
| M2 | LAPTM5    | 7805     |
| M2 | LAX1      | 54900    |
| M2 | LBH       | 81606    |
| M1 | LCAT      | 3931     |
| M2 | LCK       | 3932     |
| M2 | LCN2      | 3934     |
| M2 | LCP1      | 3936     |
| M2 | LCP2      | 3937     |
| M2 | LDHB      | 3945     |
| M1 | LDHD      | 197257   |
| M2 | LDLRAD3   | 143458   |

|    |           |          |
|----|-----------|----------|
| M2 | LDOC1     | 23641    |
| M2 | LEPROTL1  | 23484    |
| M2 | LGALS2    | 3957     |
| M2 | LGALS3    | 3958     |
| M3 | LGALS3BP  | 3959     |
| M2 | LGALS4    | 3960     |
| M2 | LGALS9    | 3965     |
| M3 | LGMN      | 5641     |
| M1 | LGSN      | 51557    |
| M2 | LHFP      | NA       |
| M2 | LHFPL2    | 10184    |
| M4 | LIF       | 3976     |
| M2 | LILRB1    | 10859    |
| M2 | LILRB2    | 10288    |
| M3 | LIMA1     | 51474    |
| M1 | LIME1     | 54923    |
| M2 | LINC00152 | NA       |
| M1 | LINC00844 | 1.01E+08 |
| M2 | LINC00924 | 145820   |
| M1 | LINC00939 | 400084   |
| M1 | LINC01018 | 255167   |
| M1 | LINC01093 | 1.01E+08 |
| M2 | LINC01094 | 1.01E+08 |
| M1 | LINC01127 | 1.01E+08 |
| M4 | LINC01279 | 1.01E+08 |
| M2 | LINC01420 | NA       |
| M1 | LIPC      | 3990     |
| M1 | LIPG      | 9388     |
| M2 | LMNB1     | 4001     |
| M1 | LNP1      | 348801   |
| M1 | LOC10013  | NA       |
| M2 | LOC10013  | NA       |
| M2 | LOC10013  | NA       |
| M2 | LOC10028  | NA       |
| M1 | LOC10028  | NA       |
| M1 | LOC10028  | NA       |
| M2 | LOC10050  | 1.01E+08 |
| M2 | LOC10050  | NA       |
| M1 | LOC10050  | 1.01E+08 |
| M2 | LOC10050  | 1.01E+08 |
| M2 | LOC10050  | 1.01E+08 |
| M2 | LOC10050  | 1.01E+08 |
| M1 | LOC10050  | 1.01E+08 |
| M2 | LOC10050  | NA       |
| M2 | LOC10050  | NA       |
| M1 | LOC10099  | 1.01E+08 |
| M4 | LOC10099  | NA       |
| M1 | LOC10106  | NA       |
| M2 | LOC10106  | NA       |
| M4 | LOC10192  | 1.02E+08 |
| M2 | LOC10192  | 1.02E+08 |
| M2 | LOC10192  | 1.02E+08 |
| M1 | LOC10192  | NA       |
| M1 | LOC10192  | NA       |
| M2 | LOC10192  | NA       |
| M1 | LOC10192  | 1.02E+08 |
| M3 | LOC10192  | NA       |
| M1 | LOC10192  | NA       |

|    |          |          |
|----|----------|----------|
| M1 | LOC10192 | 1.02E+08 |
| M2 | LOC10192 | 1.02E+08 |
| M2 | LOC10192 | 1.02E+08 |
| M1 | LOC10192 | 1.02E+08 |
| M3 | LOC10192 | 1.02E+08 |
| M2 | LOC10192 | NA       |
| M2 | LOC10192 | NA       |
| M2 | LOC10192 | NA       |
| M1 | LOC10192 | NA       |
| M4 | LOC10192 | NA       |
| M3 | LOC10192 | NA       |
| M1 | LOC10192 | 1.02E+08 |
| M2 | LOC10193 | NA       |
| M1 | LOC10272 | NA       |
| M2 | LOC10272 | 1.03E+08 |
| M1 | LOC10272 | NA       |
| M2 | LOC10272 | NA       |
| M1 | LOC14583 | NA       |
| M1 | LOC14970 | NA       |
| M1 | LOC15727 | 157273   |
| M2 | LOC15840 | NA       |
| M3 | LOC20202 | NA       |
| M1 | LOC28466 | NA       |
| M1 | LOC28518 | NA       |
| M2 | LOC28562 | NA       |
| M2 | LOC37444 | 374443   |
| M1 | LOC38983 | 389831   |
| M2 | LOC72839 | 728392   |
| M2 | LOC72871 | 728715   |
| M4 | LOC72968 | NA       |
| M1 | LOC73010 | 730101   |
| M4 | LOXL1    | 4016     |
| M4 | LOXL4    | 84171    |
| M1 | LPA      | 4018     |
| M1 | LPAL2    | 80350    |
| M2 | LPAR1    | 1902     |
| M2 | LPAR5    | 57121    |
| M2 | LPCAT1   | 79888    |
| M2 | LRMP     | 4033     |
| M4 | LRRC1    | 55227    |
| M1 | LRRC19   | 64922    |
| M3 | LRRC25   | 126364   |
| M2 | LRRC32   | 2615     |
| M3 | LSP1     | 4046     |
| M2 | LST1     | 7940     |
| M2 | LTBP2    | 4053     |
| M2 | LUM      | 4060     |
| M2 | LXN      | 56925    |
| M3 | LY75     | 4065     |
| M2 | LY86     | 9450     |
| M2 | LY9      | 4063     |
| M2 | LY96     | 23643    |
| M2 | LYN      | 4067     |
| M2 | LYSMD2   | 256586   |
| M1 | LYVE1    | 10894    |
| M2 | LYZ      | 4069     |
| M2 | MAB21L2  | 10586    |
| M2 | MAD2L1   | 4085     |

|    |              |          |
|----|--------------|----------|
| M4 | MAFF         | 23764    |
| M1 | MAGI2-AS     | 1.01E+08 |
| M1 | MAMDC4       | 158056   |
| M2 | MAML2        | 84441    |
| M2 | MAN2B1       | 4125     |
| M3 | MANF         | 7873     |
| M1 | MAOA         | 4128     |
| M2 | MAP1LC3E     | 81631    |
| M2 | MAP2         | 4133     |
| M1 | MAP2K1       | 5604     |
| M3 | MAP3K1       | 4214     |
| M2 | MAP3K8       | 1326     |
| M2 | MAP4K1       | 11184    |
| M3 | MAP7D1       | 55700    |
| M4 | MAPK13       | 5603     |
| M2 | MAPRE1       | 22919    |
| M1 | 1-Mar        | 64757    |
| M1 | 2-Mar        | 54996    |
| M2 | 1-Mar NA     |          |
| M2 | MARCKS       | 4082     |
| M1 | MAT1A        | 4143     |
| M1 | MBL1P        | 8512     |
| M3 | MBOAT1       | 154141   |
| M2 | MCAM         | 4162     |
| M1 | MCEE         | 84693    |
| M4 | MCM10        | 55388    |
| M2 | MCM2         | 4171     |
| M2 | MCM3         | 4172     |
| M2 | MCM4         | 4173     |
| M2 | MCM5         | 4174     |
| M2 | MCM6         | 4175     |
| M2 | MCM7         | 4176     |
| M2 | MCOLN2       | 255231   |
| M2 | MCTP1        | 79772    |
| M2 | MDFIC        | 29969    |
| M1 | MDN1         | 23195    |
| M3 | ME1          | 4199     |
| M2 | ME2          | 4200     |
| M2 | MELK         | 9833     |
| M4 | MEOX1        | 4222     |
| M2 | METRNL       | 284207   |
| M2 | MFAP4        | 4239     |
| M2 | MFSD1        | 64747    |
| M2 | MFSD6        | 54842    |
| M1 | MGMT         | 4255     |
| M2 | MGP          | 4256     |
| M2 | MICAL1       | 64780    |
| M3 | MICALL1      | 85377    |
| M3 | MICB         | 4277     |
| M2 | MID1IP1      | 58526    |
| M2 | MIR155       | 406947   |
| M2 | MIR155HG     | 114614   |
| M3 | MIR1908      | 1E+08    |
| M2 | MIR21        | 406991   |
| M2 | MIR224       | 407009   |
| M2 | MIR34A       | 407040   |
| M2 | MIR4435-1 NA |          |
| M2 | MIR452       | 574412   |

|    |           |          |
|----|-----------|----------|
| M2 | MIR6734   | 1.02E+08 |
| M3 | MIR675    | 1E+08    |
| M2 | MIR6756   | 1.02E+08 |
| M1 | MIR6778   | 1.02E+08 |
| M2 | MIR7703   | 1.02E+08 |
| M2 | MIR8071-1 | 1.02E+08 |
| M2 | MIR8071-2 | 1.02E+08 |
| M2 | MKI67     | 4288     |
| M2 | MLKL      | 197259   |
| M2 | MLLT11    | 10962    |
| M1 | MLPH      | 79083    |
| M1 | MLXIPL    | 51085    |
| M1 | MMAB      | 326625   |
| M2 | MMD       | 23531    |
| M1 | MME       | 4311     |
| M3 | MMGT1     | 93380    |
| M4 | MMP7      | 4316     |
| M2 | MMP9      | 4318     |
| M2 | MND1      | 84057    |
| M2 | MNDA      | 4332     |
| M4 | MNS1      | 55329    |
| M2 | MOB1A     | 55233    |
| M1 | MOGAT1    | 116255   |
| M1 | MOGAT2    | 80168    |
| M2 | MORC4     | 79710    |
| M4 | MOXD1     | 26002    |
| M1 | MPDZ      | 8777     |
| M3 | MPEG1     | 219972   |
| M1 | MPND      | 84954    |
| M1 | MPPED1    | 758      |
| M2 | MPV17     | 4358     |
| M3 | MR1       | 3140     |
| M1 | MROH2A    | 339766   |
| M2 | MS4A1     | 931      |
| M2 | MS4A4A    | 51338    |
| M2 | MS4A7     | 58475    |
| M3 | MSH2      | 4436     |
| M2 | MSR1      | 4481     |
| M1 | MT1F      | 4494     |
| M1 | MT1G      | 4495     |
| M1 | MT1H      | 4496     |
| M1 | MT1M      | 4499     |
| M1 | MT1X      | 4501     |
| M2 | MTCL1     | 23255    |
| M2 | MTHFD2    | 10797    |
| M2 | MTMR11    | 10903    |
| M2 | MTMR2     | 8898     |
| M2 | MUM1L1    | NA       |
| M3 | MVP       | 9961     |
| M2 | MX1       | 4599     |
| M2 | MX2       | 4600     |
| M1 | MXI1      | 4601     |
| M3 | MXRA5     | 25878    |
| M2 | MYC       | 4609     |
| M2 | MYL12B    | 103910   |
| M1 | MYO16     | 23026    |
| M2 | MYO1F     | 4542     |
| M2 | MYO1G     | 64005    |

|    |         |        |
|----|---------|--------|
| M2 | MYO5A   | 4644   |
| M2 | MYOF    | 26509  |
| M1 | MYOM1   | 8736   |
| M2 | MZB1    | 51237  |
| M2 | NAA40   | 79829  |
| M2 | NABP1   | 64859  |
| M2 | NAGK    | 55577  |
| M1 | NAGS    | 162417 |
| M2 | NALCN   | 259232 |
| M3 | NAP1L1  | 4673   |
| M3 | NAP1L3  | 4675   |
| M2 | NAPSB   | 256236 |
| M2 | NARR    | NA     |
| M2 | NBEA    | 26960  |
| M3 | NCAPD2  | 9918   |
| M2 | NCAPG   | 64151  |
| M3 | NCEH1   | 57552  |
| M2 | NCF1    | 653361 |
| M2 | NCF1B   | 654816 |
| M2 | NCF1C   | 654817 |
| M2 | NCF2    | 4688   |
| M3 | NCF4    | 4689   |
| M2 | NCK2    | 8440   |
| M2 | NCKAP1L | 3071   |
| M2 | NDC80   | 10403  |
| M2 | NDN     | 4692   |
| M4 | NEB     | 4703   |
| M2 | NEDD9   | 4739   |
| M2 | NELL2   | 4753   |
| M2 | NETO2   | 81831  |
| M1 | NEU4    | 129807 |
| M3 | NEURL1B | 54492  |
| M2 | NEURL3  | 93082  |
| M4 | NEXN    | 91624  |
| M4 | NFE2L3  | 9603   |
| M2 | NFKBIE  | 4794   |
| M1 | NFKBIZ  | 64332  |
| M2 | NKG7    | 4818   |
| M3 | NLRC3   | 197358 |
| M2 | NLRC5   | 84166  |
| M2 | NME5    | 8382   |
| M2 | NMI     | 9111   |
| M1 | NMRK1   | 54981  |
| M3 | NOD2    | 64127  |
| M1 | NOL4    | 8715   |
| M2 | NPC2    | 10577  |
| M2 | NPNT    | 255743 |
| M4 | NPTX2   | 4885   |
| M3 | NPW     | 283869 |
| M1 | NPY6R   | 4888   |
| M4 | NQO1    | 1728   |
| M1 | NR1I2   | 8856   |
| M1 | NR1I3   | 9970   |
| M1 | NR3C2   | 4306   |
| M2 | NRROS   | 375387 |
| M1 | NSUN6   | 221078 |
| M2 | NT5C3A  | 51251  |
| M1 | NTHL1   | 4913   |

|    |          |          |
|----|----------|----------|
| M2 | NTS      | 4922     |
| M3 | NUAK2    | 81788    |
| M2 | NUF2     | 83540    |
| M1 | NUPR1    | 26471    |
| M2 | NUSAP1   | 51203    |
| M2 | OAS1     | 4938     |
| M2 | OAS2     | 4939     |
| M1 | OAT      | 4942     |
| M2 | ODC1     | 4953     |
| M2 | OGFRL1   | 79627    |
| M2 | OIP5     | 11339    |
| M3 | OLFML1   | 283298   |
| M2 | OLFML2B  | 25903    |
| M3 | OLFML3   | 56944    |
| M2 | ORC6     | 23594    |
| M2 | OSBPL3   | 26031    |
| M1 | OSBPL6   | 114880   |
| M2 | OSCAR    | 126014   |
| M2 | OSMR     | 9180     |
| M3 | OTUD6B   | 51633    |
| M1 | OVGP1    | 5016     |
| M2 | OVOS     | 408186   |
| M2 | OVOS2    | 144203   |
| M2 | OXCT1    | 5019     |
| M2 | P2RX5    | 5026     |
| M2 | P2RX5-TA | 1.01E+08 |
| M2 | P2RY12   | 64805    |
| M3 | P2RY13   | 53829    |
| M2 | P2RY14   | 9934     |
| M2 | P2RY8    | 286530   |
| M1 | PACSIN3  | 29763    |
| M3 | PAG1     | 55824    |
| M1 | PAIP2B   | 400961   |
| M2 | PALLD    | 23022    |
| M1 | PALM2    | NA       |
| M1 | PALM3    | 342979   |
| M3 | PAM      | 5066     |
| M1 | PAN2     | 9924     |
| M1 | PANK1    | 53354    |
| M2 | PAPLN    | 89932    |
| M2 | PAPSS1   | 9061     |
| M2 | PAQR5    | 54852    |
| M2 | PAQR8    | 85315    |
| M2 | PARP12   | 64761    |
| M2 | PARP8    | 79668    |
| M2 | PARVG    | 64098    |
| M2 | PBK      | 55872    |
| M1 | PBLD     | 64081    |
| M1 | PCBD1    | 5092     |
| M2 | PCDH17   | 27253    |
| M3 | PCED1B   | 91523    |
| M1 | PCK1     | 5105     |
| M2 | PCNA     | 5111     |
| M1 | PCOLCE2  | 26577    |
| M2 | PCYOX1L  | 78991    |
| M2 | PDGFA    | 5154     |
| M2 | PDGFD    | 80310    |
| M1 | PDK4     | 5166     |



|    |          |        |
|----|----------|--------|
| M2 | PDP1     | 54704  |
| M4 | PDZK1IP1 | 10158  |
| M2 | PDZRN3   | 23024  |
| M3 | PEA15    | 8682   |
| M2 | PECAM1   | 5175   |
| M2 | PEG10    | 23089  |
| M3 | PFKFB3   | 5209   |
| M2 | PFKP     | 5214   |
| M1 | PFN2     | 5217   |
| M2 | PHF19    | 26147  |
| M4 | PHLDA1   | 22822  |
| M2 | PHLDA2   | 7262   |
| M1 | PHYHD1   | 254295 |
| M3 | PIGR     | 5284   |
| M1 | PIK3C2G  | 5288   |
| M2 | PIK3CG   | 5294   |
| M2 | PIK3R3   | 8503   |
| M2 | PILRA    | 29992  |
| M2 | PIM2     | 11040  |
| M4 | PIR      | 8544   |
| M2 | PIWIL4   | 143689 |
| M2 | PJA1     | 64219  |
| M2 | PKDCC    | 91461  |
| M2 | PKIB     | 5570   |
| M1 | PKLR     | 5313   |
| M2 | PKM      | 5315   |
| M2 | PLA2G2A  | 5320   |
| M2 | PLA2G4A  | 5321   |
| M2 | PLA2G7   | 7941   |
| M2 | PLAC8    | 51316  |
| M2 | PLAGL1   | 5325   |
| M2 | PLAT     | 5327   |
| M2 | PLAUR    | 5329   |
| M2 | PLBD1    | 79887  |
| M2 | PLCXD3   | 345557 |
| M2 | PLEK     | 5341   |
| M2 | PLEKHO1  | 51177  |
| M2 | PLEKHO2  | 80301  |
| M1 | PLG      | 5340   |
| M1 | PLIN1    | 5346   |
| M2 | PLIN3    | 10226  |
| M3 | PLK2     | 10769  |
| M2 | PLP2     | 5355   |
| M2 | PLSCR1   | 5359   |
| M3 | PLTP     | 5360   |
| M2 | PLXDC2   | 84898  |
| M2 | PLXNC1   | 10154  |
| M4 | PMEPA1   | 56937  |
| M2 | PNMA1    | 9240   |
| M2 | PNMA2    | 10687  |
| M2 | PNMAL1   | NA     |
| M2 | PODXL    | 5420   |
| M3 | POLA1    | 5422   |
| M2 | POLE2    | 5427   |
| M1 | PON1     | 5444   |
| M2 | POU2AF1  | 5450   |
| M2 | PPA1     | 5464   |
| M4 | PPAP2C   | NA     |

|    |            |          |
|----|------------|----------|
| M2 | PPAPDC1/NA |          |
| M1 | PPBP       | 5473     |
| M2 | PPDPF      | 79144    |
| M2 | PPIH       | 10465    |
| M1 | PPM1E      | 22843    |
| M2 | PPM1M      | 132160   |
| M3 | PPP1R12A   | 4659     |
| M2 | PPP1R14A   | 94274    |
| M2 | PPP1R16B   | 26051    |
| M2 | PPP1R18    | 170954   |
| M1 | PPP1R1A    | 5502     |
| M1 | PPP1R3C    | 5507     |
| M3 | PPP4R1     | 9989     |
| M2 | PPT1       | 5538     |
| M2 | PRC1       | 9055     |
| M2 | PREX1      | 57580    |
| M2 | PRF1       | 5551     |
| M1 | PRG4       | 10216    |
| M3 | PRKAR2B    | 5577     |
| M2 | PRKCD      | 5580     |
| M2 | PRKX       | 5613     |
| M2 | PRKY       | 5616     |
| M2 | PROCR      | 10544    |
| M2 | PROM1      | 8842     |
| M1 | PROX1      | 5629     |
| M1 | PROZ       | 8858     |
| M4 | PRR15L     | 79170    |
| M2 | PRSS23     | 11098    |
| M2 | PRTFDC1    | 56952    |
| M2 | PSMB10     | 5699     |
| M2 | PSMB8      | 5696     |
| M2 | PSMB9      | 5698     |
| M2 | PSMD14     | 10213    |
| M2 | PSME2      | 5721     |
| M3 | PSTPIP1    | 9051     |
| M3 | PSTPIP2    | 9050     |
| M2 | PTGDS      | 5730     |
| M2 | PTGER2     | 5732     |
| M2 | PTGER4     | 5734     |
| M3 | PTGFRN     | 5738     |
| M2 | PTPN22     | 26191    |
| M2 | PTPRC      | 5788     |
| M2 | PTPRCAP    | 5790     |
| M2 | PTTG1      | 9232     |
| M2 | PVRIG      | 79037    |
| M2 | PXDN       | 7837     |
| M1 | PXMP2      | 5827     |
| M2 | PYCARD     | 29108    |
| M2 | PYHIN1     | 149628   |
| M1 | PZP        | 5858     |
| M2 | QPCT       | 25797    |
| M1 | RAB11B-A   | 1.01E+08 |
| M4 | RAB25      | 57111    |
| M3 | RAB31      | 11031    |
| M2 | RAB32      | 10981    |
| M2 | RAB34      | 83871    |
| M2 | RAB38      | 23682    |
| M2 | RAB8B      | 51762    |

|    |             |          |
|----|-------------|----------|
| M2 | RAC2        | 5880     |
| M2 | RACGAP1     | 29127    |
| M2 | RAD51AP1    | 10635    |
| M3 | RAI2        | 10742    |
| M2 | RALGDS      | 5900     |
| M1 | RAMP1       | 10267    |
| M1 | RANBP3L     | 202151   |
| M1 | RAPH1       | 65059    |
| M2 | RARRES1     | 5918     |
| M2 | RARRES3     | NA       |
| M2 | RASGEF1A    | 221002   |
| M3 | RASGRP1     | 10125    |
| M2 | RASSF2      | 9770     |
| M2 | RASSF3      | 283349   |
| M2 | RBBP8       | 5932     |
| M3 | RBM3        | 5935     |
| M1 | RBP5        | 83758    |
| M2 | RCAN2       | 10231    |
| M2 | RCAN3       | 11123    |
| M2 | RCC2        | 55920    |
| M1 | RCL1        | 10171    |
| M3 | RCN2        | 5955     |
| M3 | RCSD1       | 92241    |
| M2 | RDH12       | 145226   |
| M1 | RDH16       | 8608     |
| M3 | RECQL       | 5965     |
| M2 | RELB        | 5971     |
| M2 | RERG        | 85004    |
| M2 | RFC4        | 5984     |
| M2 | RFX5        | 5993     |
| M2 | RGCC        | 28984    |
| M3 | RGL1        | 23179    |
| M2 | RGS1        | 5996     |
| M2 | RGS10       | 6001     |
| M2 | RGS18       | 64407    |
| M3 | RGS19       | 10287    |
| M2 | RGS2        | 5997     |
| M2 | RGS4        | 5999     |
| M3 | RHBDF2      | 79651    |
| M2 | RHNO1       | 83695    |
| M2 | RHOBTB1     | 9886     |
| M2 | RHOG        | 391      |
| M2 | RHOH        | 399      |
| M2 | RHOQ        | 23433    |
| M2 | RIPK2       | 8767     |
| M2 | RMI2        | 116028   |
| M2 | RNASE2      | 6036     |
| M2 | RNASE6      | 6039     |
| M2 | RNASEH2A    | 10535    |
| M1 | RND2        | 8153     |
| M2 | RND3        | 390      |
| M2 | RNF103-C    | 1.01E+08 |
| M2 | RNF135      | 84282    |
| M3 | RNF166      | 115992   |
| M2 | ROBO1       | 6091     |
| M1 | RORC        | 6097     |
| M1 | RP1-151F1NA |          |
| M1 | RP1-193H.NA |          |

|    |              |        |
|----|--------------|--------|
| M2 | RP1-93H1:NA  |        |
| M4 | RP11-11N:NA  |        |
| M1 | RP11-250E:NA |        |
| M1 | RP11-327J:NA |        |
| M1 | RP11-355E:NA |        |
| M1 | RP11-384I:NA |        |
| M3 | RP11-389C:NA |        |
| M2 | RP11-38P2:NA |        |
| M2 | RP11-401F:NA |        |
| M1 | RP11-456F:NA |        |
| M1 | RP11-458I:NA |        |
| M1 | RP11-486C:NA |        |
| M2 | RP11-488I:NA |        |
| M1 | RP11-635I:NA |        |
| M2 | RP11-642I:NA |        |
| M2 | RP11-686I:NA |        |
| M1 | RP11-740C:NA |        |
| M2 | RP11-747F:NA |        |
| M1 | RP11-863F:NA |        |
| M1 | RP11-96D:NA  |        |
| M1 | RP3-406A:NA  |        |
| M1 | RP4-680D:NA  |        |
| M1 | RP4-791M:NA  |        |
| M4 | RP5-1154I:NA |        |
| M4 | RPL22L1      | 200916 |
| M2 | RPL39L       | 116832 |
| M3 | RPS6KA1      | 6195   |
| M2 | RRAS         | 6237   |
| M2 | RRM2         | 6241   |
| M3 | RRM2B        | 50484  |
| M2 | RSAD2        | 91543  |
| M2 | RTN1         | 6252   |
| M2 | RTP4         | 64108  |
| M2 | RUNX1-IT:    | 80215  |
| M2 | RUNX3        | 864    |
| M1 | RXRA         | 6256   |
| M2 | S100A11      | 6282   |
| M2 | S100A11P:    | 729659 |
| M4 | S100A14      | 57402  |
| M2 | S100A4       | 6275   |
| M2 | S100A6       | 6277   |
| M2 | S100A8       | 6279   |
| M2 | S100A9       | 6280   |
| M2 | SACS         | 26278  |
| M2 | SAMD11       | 148398 |
| M2 | SAMD9        | 54809  |
| M2 | SAMD9L       | 219285 |
| M2 | SAMHD1       | 25939  |
| M2 | SAMSN1       | 64092  |
| M2 | SASH3        | 54440  |
| M1 | SAT2         | 112483 |
| M1 | SC5D         | 6309   |
| M1 | SCARA5       | 286133 |
| M3 | SCD          | 6319   |
| M1 | SCG5         | 6447   |
| M2 | SCGN         | 10590  |
| M2 | SCRN1        | 9805   |
| M1 | SDC2         | 6383   |

|    |          |        |
|----|----------|--------|
| M4 | SDCBP2   | 27111  |
| M2 | SECTM1   | 6398   |
| M2 | SEL1L3   | 23231  |
| M1 | SELENBP1 | 8991   |
| M2 | SELL     | 6402   |
| M2 | SELM     | NA     |
| M2 | SEMA3C   | 10512  |
| M2 | SEMA4D   | 10507  |
| M3 | 6-Sep    | NA     |
| M1 | SERPINA5 | 5104   |
| M2 | SERPINB1 | 1992   |
| M2 | SERPINB8 | 5271   |
| M2 | SERPINB9 | 5272   |
| M2 | SERPINE2 | 5270   |
| M1 | SERPINF2 | 5345   |
| M2 | SERPINH1 | 871    |
| M2 | SFRP5    | 6425   |
| M2 | SFXN3    | 81855  |
| M2 | SGCB     | 6443   |
| M3 | SGK1     | 6446   |
| M2 | SGK223   | NA     |
| M2 | SGOL2    | NA     |
| M2 | SH3BGRL  | 6451   |
| M3 | SH3BGRL3 | 83442  |
| M2 | SHCBP1   | 79801  |
| M1 | SHD      | 56961  |
| M1 | SHF      | 90525  |
| M2 | SIDT1    | 54847  |
| M1 | SIGIRR   | 59307  |
| M2 | SIGLEC1  | 6614   |
| M2 | SIGLEC10 | 89790  |
| M2 | SIRPG    | 55423  |
| M2 | SKA2     | 348235 |
| M1 | SKAP1    | 8631   |
| M1 | SKIDA1   | 387640 |
| M3 | SLA      | 6503   |
| M2 | SLAMF6   | 114836 |
| M2 | SLAMF7   | 57823  |
| M2 | SLAMF8   | 56833  |
| M2 | SLC12A2  | 6558   |
| M1 | SLC13A5  | 284111 |
| M2 | SLC15A3  | 51296  |
| M1 | SLC16A10 | 117247 |
| M2 | SLC16A7  | 9194   |
| M1 | SLC17A2  | 10246  |
| M3 | SLC18B1  | 116843 |
| M1 | SLC19A2  | 10560  |
| M1 | SLC22A1  | 6580   |
| M4 | SLC22A15 | 55356  |
| M1 | SLC22A25 | 387601 |
| M3 | SLC25A33 | 84275  |
| M2 | SLC26A2  | 1836   |
| M1 | SLC27A5  | 10998  |
| M4 | SLC28A3  | 64078  |
| M3 | SLC29A3  | 55315  |
| M2 | SLC2A3   | 6515   |
| M2 | SLC2A6   | 11182  |
| M2 | SLC35G1  | 159371 |

|    |           |          |
|----|-----------|----------|
| M1 | SLC37A4   | 2542     |
| M2 | SLC38A1   | 81539    |
| M1 | SLC38A4   | 55089    |
| M2 | SLC38A6   | 145389   |
| M3 | SLC39A10  | 57181    |
| M1 | SLC39A5   | 283375   |
| M3 | SLC44A2   | 57153    |
| M3 | SLC44A3   | 126969   |
| M1 | SLC45A3   | 85414    |
| M2 | SLC45A4   | 57210    |
| M1 | SLC47A1   | 55244    |
| M2 | SLC51A    | 200931   |
| M4 | SLC51B    | 123264   |
| M1 | SLC6A1    | 6529     |
| M1 | SLC6A13   | 6540     |
| M1 | SLC6A16   | 28968    |
| M2 | SLC7A6    | 9057     |
| M2 | SLC7A7    | 9056     |
| M1 | SLC9B2    | 133308   |
| M1 | SLCO1B1   | 10599    |
| M2 | SLFN11    | 91607    |
| M4 | SLFN12    | 55106    |
| M4 | SLFN13    | 146857   |
| M2 | SLFN5     | 162394   |
| M2 | SLIT2     | 9353     |
| M1 | SLITRK3   | 22865    |
| M2 | SMAD9     | 4093     |
| M3 | SMARCA5   | 8467     |
| M3 | SMC2      | 10592    |
| M2 | SMC4      | 10051    |
| M1 | SMIM1     | 388588   |
| M1 | SMIM14    | 201895   |
| M1 | SMIM2-AS1 | 1.02E+08 |
| M3 | SMIM3     | 85027    |
| M1 | SMOC1     | 64093    |
| M2 | SMOC2     | 64094    |
| M4 | SMPX      | 23676    |
| M3 | SMS       | 6611     |
| M2 | SNAP25    | 6616     |
| M2 | SNHG12    | 85028    |
| M2 | SNN       | 8303     |
| M2 | SNORA16/  | 692073   |
| M2 | SNORA44   | 677825   |
| M2 | SNORA61   | 677838   |
| M3 | SNX7      | 51375    |
| M1 | SORD      | 6652     |
| M1 | SORL1     | 6653     |
| M2 | SORT1     | 6272     |
| M1 | SOWAHC    | 65124    |
| M2 | SOX4      | 6659     |
| M2 | SOX9      | 6662     |
| M2 | SP110     | 3431     |
| M2 | SP140     | 11262    |
| M4 | SPA17     | 53340    |
| M3 | SPAG1     | 6674     |
| M3 | SPARC     | 6678     |
| M4 | SPATS2    | 65244    |
| M2 | SPC25     | 57405    |

|    |             |        |
|----|-------------|--------|
| M3 | SPDL1       | 54908  |
| M3 | SPIN4       | 139886 |
| M4 | SPINK1      | 6690   |
| M4 | SPINT2      | 10653  |
| M2 | SPON1       | 10418  |
| M2 | SPON2       | 10417  |
| M2 | SPP1        | 6696   |
| M3 | SPSB1       | 80176  |
| M3 | SPTSSA      | 171546 |
| M1 | SRD5A1      | 6715   |
| M1 | SRD5A2      | 6716   |
| M2 | SRGN        | 5552   |
| M2 | SRPX        | 8406   |
| M4 | SRXN1       | 140809 |
| M1 | SS18L1      | 26039  |
| M2 | SSPN        | 8082   |
| M1 | ST3GAL1     | 6482   |
| M1 | ST3GAL6     | 10402  |
| M2 | ST8SIA4     | 7903   |
| M2 | STAMBPL1    | 57559  |
| M2 | STARD3NL    | 83930  |
| M2 | STAT1       | 6772   |
| M2 | STEAP4      | 79689  |
| M2 | STIL        | 6491   |
| M3 | STK10       | 6793   |
| M3 | STK17A      | 9263   |
| M2 | STK17B      | 9262   |
| M2 | STK39       | 27347  |
| M4 | STMN2       | 11075  |
| M2 | STX11       | 8676   |
| M2 | SUCO        | 51430  |
| M3 | SULF2       | 55959  |
| M1 | SULT1E1     | 6783   |
| M2 | SUSD1       | 64420  |
| M2 | SWAP70      | 23075  |
| M2 | SYK         | 6850   |
| M1 | SYPL2       | 284612 |
| M2 | SYS1-DBN    | 767557 |
| M2 | SYT13       | 57586  |
| M1 | SYT17       | 51760  |
| M2 | SYTL1       | 84958  |
| M2 | TACC3       | 10460  |
| M2 | TAGAP       | 117289 |
| M2 | TAGLN       | 6876   |
| M2 | TAGLN2      | 8407   |
| M2 | TAP1        | 6890   |
| M2 | TAP2        | 6891   |
| M3 | TARP        | 445347 |
| M1 | TAT         | 6898   |
| M2 | TAX1BP3     | 30851  |
| M2 | TBC1D10C    | 374403 |
| M1 | TBC1D2      | 55357  |
| M2 | TC2N        | 123036 |
| M1 | TCEA3       | 6920   |
| M2 | TCEAL3      | 85012  |
| M3 | TCEAL7      | 56849  |
| M2 | TCEAL8      | 90843  |
| M1 | TCEB3-AS:NA |        |

|    |            |          |
|----|------------|----------|
| M2 | TCF19      | 6941     |
| M2 | TCF4       | 6925     |
| M2 | TCHH       | 7062     |
| M2 | TCIRG1     | 10312    |
| M2 | TCL1A      | 8115     |
| M2 | TCTEX1D2   | 255758   |
| M2 | TDGF1      | 6997     |
| M2 | TDGF1P3    | 6998     |
| M1 | TDRD6      | 221400   |
| M2 | TDRD7      | 23424    |
| M1 | TENM1      | 10178    |
| M1 | TENM2      | 57451    |
| M2 | TES        | 26136    |
| M4 | TESC       | 54997    |
| M2 | TFEC       | 22797    |
| M3 | TFPI2      | 7980     |
| M1 | TFR2       | 7036     |
| M3 | TGFB111    | 7041     |
| M2 | TGFBI      | 7045     |
| M2 | THBD       | 7056     |
| M2 | THBS1      | 7057     |
| M2 | THBS2      | 7058     |
| M2 | THEMIS     | 387357   |
| M2 | THEMIS2    | 9473     |
| M1 | THOP1      | 7064     |
| M1 | THRB-IT1   | 1.01E+08 |
| M1 | THRSP      | 7069     |
| M4 | THSD7A     | 221981   |
| M4 | THY1       | 7070     |
| M2 | TIGIT      | 201633   |
| M3 | TIMD4      | 91937    |
| M2 | TIMP1      | 7076     |
| M3 | TIMP2      | 7077     |
| M2 | TK1        | 7083     |
| M2 | TLCD1      | 116238   |
| M3 | TLR1       | 7096     |
| M2 | TLR2       | 7097     |
| M3 | TLR4       | 7099     |
| M3 | TLR5       | 7100     |
| M2 | TLR7       | 51284    |
| M2 | TLR8       | 51311    |
| M3 | TM6SF1     | 53346    |
| M1 | TM6SF2     | 53345    |
| M4 | TMC4       | 147798   |
| M2 | TMC6       | 11322    |
| M2 | TMEM100    | 55273    |
| M1 | TMEM120,   | 83862    |
| M4 | TMEM125    | 128218   |
| M2 | TMEM154    | 201799   |
| M3 | TMEM164    | 84187    |
| M2 | TMEM173 NA |          |
| M4 | TMEM200,   | 114801   |
| M1 | TMEM220    | 388335   |
| M2 | TMEM243    | 79161    |
| M4 | TMEM255,   | 55026    |
| M1 | TMEM256    | 254863   |
| M1 | TMEM44-,   | 1.01E+08 |
| M2 | TMEM45B    | 120224   |



|    |             |          |
|----|-------------|----------|
| M2 | TMEM50A     | 23585    |
| M2 | TMEM51      | 55092    |
| M1 | TMEM52      | 339456   |
| M4 | TMEM55A NA  |          |
| M1 | TMEM56 NA   |          |
| M3 | TMEM87B     | 84910    |
| M4 | TMPRSS3     | 64699    |
| M2 | TMSB10      | 9168     |
| M3 | TMSB4X      | 7114     |
| M2 | TNF         | 7124     |
| M2 | TNFAIP3     | 7128     |
| M2 | TNFAIP8     | 25816    |
| M2 | TNFAIP8L2   | 79626    |
| M2 | TNFRSF11L   | 8792     |
| M3 | TNFRSF11L   | 4982     |
| M2 | TNFRSF12L   | 51330    |
| M2 | TNFRSF17    | 608      |
| M3 | TNFRSF1B    | 7133     |
| M2 | TNFRSF21    | 27242    |
| M2 | TNFSF13B    | 10673    |
| M2 | TOMM40L     | 84134    |
| M2 | TOP2A       | 7153     |
| M2 | TOX         | 9760     |
| M3 | TOX2        | 84969    |
| M3 | TOX3        | 27324    |
| M3 | TP53BP2     | 7159     |
| M2 | TP53I3      | 9540     |
| M2 | TPM1        | 7168     |
| M1 | TPPP2       | 122664   |
| M2 | TPX2        | 22974    |
| M2 | TRAC        | 28755    |
| M2 | TRAF3IP3    | 80342    |
| M2 | TRAF5       | 7188     |
| M2 | TRAJ17      | 28738    |
| M2 | TRAPPC2P NA |          |
| M2 | TRAT1       | 50852    |
| M2 | TRBC1       | 28639    |
| M2 | TRDV2       | 28517    |
| M2 | TREM2       | 54209    |
| M2 | TRG-AS1     | 1.01E+08 |
| M3 | TRGC2       | 6967     |
| M3 | TRGV9       | 6983     |
| M2 | TRIM21      | 6737     |
| M3 | TRIM22      | 10346    |
| M4 | TRIM31      | 11074    |
| M1 | TRIM55      | 84675    |
| M2 | TRIM6       | 117854   |
| M2 | TRIM69      | 140691   |
| M2 | TRIP13      | 9319     |
| M4 | TRNP1       | 388610   |
| M1 | TSLP        | 85480    |
| M3 | TSPAN8      | 7103     |
| M2 | TSPO        | 706      |
| M2 | TSPYL5      | 85453    |
| M1 | TTC36       | 143941   |
| M2 | TTK         | 7272     |
| M1 | TTPA        | 7274     |
| M2 | TUBA1A      | 7846     |

|    |         |        |
|----|---------|--------|
| M2 | TUBA1B  | 10376  |
| M2 | TUBA1C  | 84790  |
| M2 | TUBB6   | 84617  |
| M3 | TUBG1   | 7283   |
| M2 | TUSC3   | 7991   |
| M2 | TWSG1   | 57045  |
| M2 | TYMP    | 1890   |
| M2 | TYMS    | 7298   |
| M2 | TYMSOS  | 494514 |
| M2 | TYROBP  | 7305   |
| M2 | UAP1L1  | 91373  |
| M2 | UBASH3A | 53347  |
| M3 | UBD     | 10537  |
| M2 | UBE2A   | 7319   |
| M2 | UBE2C   | 11065  |
| M2 | UBE2L6  | 9246   |
| M3 | UBE2Q2  | 92912  |
| M2 | UBE2S   | 27338  |
| M2 | UBE2T   | 29089  |
| M3 | UBLCP1  | 134510 |
| M2 | UCP2    | 7351   |
| M3 | UGCG    | 7357   |
| M3 | UGT2A3  | 79799  |
| M2 | UHRF1   | 29128  |
| M1 | UPB1    | 51733  |
| M2 | UPP2    | 151531 |
| M2 | UTS2    | 10911  |
| M2 | UXS1    | 80146  |
| M2 | VAMP5   | 10791  |
| M2 | VAV1    | 7409   |
| M4 | VCAN    | 1462   |
| M3 | VEGFC   | 7424   |
| M1 | VIL1    | 7429   |
| M2 | VIM     | 7431   |
| M2 | VMO1    | 284013 |
| M2 | VMP1    | 81671  |
| M2 | VNN2    | 8875   |
| M2 | VOPP1   | 81552  |
| M3 | VRK1    | 7443   |
| M2 | VSIG10L | 147645 |
| M2 | VSIG4   | 11326  |
| M1 | VSNL1   | 7447   |
| M4 | VTCN1   | 79679  |
| M2 | VWA5A   | 4013   |
| M2 | WARS    | NA     |
| M2 | WBP5    | NA     |
| M2 | WDR54   | 84058  |
| M3 | WDYHV1  | 55093  |
| M2 | WFDC1   | 58189  |
| M2 | WIPF1   | 7456   |
| M3 | WIP11   | 55062  |
| M2 | WISP1   | NA     |
| M3 | WLS     | 79971  |
| M2 | WSB2    | 55884  |
| M3 | WWC3    | 55841  |
| M2 | XAF1    | 54739  |
| M2 | XCL1    | 6375   |
| M2 | XCL2    | 6846   |

|    |          |        |
|----|----------|--------|
| M3 | YAP1     | 10413  |
| M3 | YWHAB    | 7529   |
| M2 | YWHAZ    | 7534   |
| M2 | ZAP70    | 7535   |
| M1 | ZBTB16   | 7704   |
| M2 | ZC3H12D  | 340152 |
| M1 | ZCCHC6   | NA     |
| M1 | ZDHHC11  | 79844  |
| M1 | ZDHHC11f | 653082 |
| M2 | ZEB2     | 9839   |
| M2 | ZFP3     | 124961 |
| M3 | ZFPM2    | 23414  |
| M1 | ZG16     | 653808 |
| M2 | ZG16B    | 124220 |
| M1 | ZGPAT    | 84619  |
| M1 | ZKSCAN1  | 7586   |
| M2 | ZMAT3    | 64393  |
| M2 | ZNF101   | 94039  |
| M2 | ZNF124   | 7678   |
| M2 | ZNF14    | 7561   |
| M4 | ZNF165   | 7718   |
| M3 | ZNF200   | 7752   |
| M2 | ZNF267   | 10308  |
| M2 | ZNF367   | 195828 |
| M1 | ZNF385B  | 151126 |
| M1 | ZNF395   | 55893  |
| M2 | ZNF430   | 80264  |
| M2 | ZNF439   | 90594  |
| M3 | ZNF468   | 90333  |
| M1 | ZNF511   | 118472 |
| M2 | ZNF532   | 55205  |
| M2 | ZNF83    | 55769  |
| M2 | ZNFX1    | 57169  |
| M2 | ZUFSP    | NA     |
| M2 | ZWILCH   | 55055  |
| M2 | ZWINT    | 11130  |

---
